# Supplementary material for: Characterization of the lncRNA-miRNA-mRNA regulatory network to reveal potential functional competing endogenous RNAs in traumatic brain injury
Source: Front Neurosci. 2023 Jan 11;16:1089857. doi: 10.3389/fnins.2022.1089857 (PMC9874919; doi:10.3389/fnins.2022.1089857)
Supplement: Supplementary file 1 [file Table_1.XLSX]

## Sheet: Sheet1
Table S1. Detail information of differentially expressed lncRNAs.
lncRNA ID	Fold change	Log2fold change	P-value	Up/down	Chrom	Start	End	Strand	Partner RNA transcript	Distance	Direction	Type	Location	Subtype	Partner gene	Dbxref	Product	GO ID	GO term	Pathway ID	Pathway description
NONRATT000016.2	0.470508	-1.08771	0.0383129	Down	Chr1	5576568	5665244	+	NM_001276762.1	5057	sense	intergenic	downstream	same_strand	Epm2a	GeneID:114005,Genbank:NM_001276762.1,RGD:71047	epilepsy, progressive myoclonus type 2A	GO:0005829,GO:0005844,GO:0005886,GO:0005977,GO:0006470,GO:0006914,GO:0035305,GO:0007399,GO:0035335,GO:0008138,GO:0042803,GO:0010923,GO:0046838,GO:0046959,GO:0046983,GO:0098556,GO:2001069,GO:0004722,GO:0004725,GO:0005634,GO:0005654,GO:0005737,GO:0016239,GO:0016311,GO:0016791,GO:0019203,GO:0030246,GO:2001070,GO:0032007	cytosol|polysome|plasma membrane|glycogen metabolic process|protein dephosphorylation|autophagy|negative regulation of dephosphorylation|nervous system development|peptidyl-tyrosine dephosphorylation|protein tyrosine/serine/threonine phosphatase activity|protein homodimerization activity|negative regulation of phosphatase activity|phosphorylated carbohydrate dephosphorylation|habituation|protein …
NONRATT000106.2	0.0908794	-3.4599	7.98912e-11	Down	Chr1	28160316	28161519	+	XM_017590417.1	0	sense	genic	exonic	nested	LOC102551716	GeneID:102551716,Genbank:XM_017590417.1,RGD:7740967	sodium/potassium-transporting ATPase subunit beta-1-interacting protein 2-like	GO:0002028,GO:0005886,GO:0016021	regulation of sodium ion transport|plasma membrane|integral component of membrane
NONRATT000112.2	0.342742	-1.54481	0.0401011	Down	Chr1	29419591	29425235	+	NM_001100825.1	0	sense	genic	exonic	overlapping	Hint3	GeneID:246769,Genbank:NM_001100825.1,RGD:621603	histidine triad nucleotide binding protein 3, transcript variant 1	GO:0005737,GO:0006796,GO:0016787,GO:0070566,GO:0000166,GO:0003824,GO:0005634	cytoplasm|phosphate-containing compound metabolic process|hydrolase activity|adenylyltransferase activity|nucleotide binding|catalytic activity|nucleus
NONRATT000135.2	0	-Inf	0.000299648	Down	Chr1	35302782	35303167	+	XM_225143.7	0	sense	genic	exonic	nested	Ice1	GeneID:306665,Genbank:XM_225143.7,RGD:1309747	interactor of little elongation complex ELL subunit 1	GO:0008023,GO:0008150,GO:0015030,GO:0016604,GO:0031334,GO:0035327,GO:0035363,GO:0042795,GO:0042796,GO:0045945,GO:0090316,GO:0003674,GO:0005575,GO:0005654	transcription elongation factor complex|biological_process|Cajal body|nuclear body|positive regulation of protein complex assembly|transcriptionally active chromatin|histone locus body|snRNA transcription by RNA polymerase II|snRNA transcription by RNA polymerase III|positive regulation of transcription by RNA polymerase III|positive regulation of intracellular protein transport|molecular_functio…
NONRATT000167.2	6.5319	2.7075	0.000882018	Up	Chr1	46978412	46984219	+	XM_006227894.2	0	sense	genic	exonic	nested	Gtf2h5	GeneID:502227,Genbank:XM_006227894.2,RGD:1560991	general transcription factor IIH subunit 5, transcript variant X1	GO:0005575,GO:0005669,GO:0005730,GO:0006289,GO:0006294,GO:0006355,GO:0006362,GO:0006364,GO:0008150,GO:0071480,GO:0000182,GO:0000439,GO:0003674	cellular_component|transcription factor TFIID complex|nucleolus|nucleotide-excision repair|nucleotide-excision repair, preincision complex assembly|regulation of transcription, DNA-templated|transcription elongation from RNA polymerase I promoter|rRNA processing|biological_process|cellular response to gamma radiation|rDNA binding|core TFIIH complex|molecular_function	rno03022,rno03420	Basal transcription factors|Nucleotide excision repair
NONRATT000193.2	3.12636	1.64448	0.00131401	Up	Chr1	48122084	48124075	-	XM_017589517.1	0	sense	genic	intronic	nested	Mas1l	GeneID:404641,Genbank:XM_017589517.1,RGD:738049	MAS1 proto-oncogene like, G protein-coupled receptor, transcript variant X3	GO:0005654,GO:0005829,GO:0005886,GO:0005887,GO:0007186,GO:0038166,GO:0001595,GO:0004930	nucleoplasm|cytosol|plasma membrane|integral component of plasma membrane|G-protein coupled receptor signaling pathway|angiotensin-activated signaling pathway|angiotensin receptor activity|G-protein coupled receptor activity
NONRATT000203.2	0.428539	-1.2225	0.0115924	Down	Chr1	51059571	51061227	+	NM_001115021.1	8880	sense	intergenic	downstream	same_strand	Qk	GeneID:499022,Genbank:NM_001115021.1,RGD:1584886	quaking	GO:0042692,GO:0005634,GO:0042759,GO:0048255,GO:0005737,GO:0006397,GO:0007286,GO:0007420,GO:0008366,GO:0048714,GO:0008380,GO:0051028,GO:0010628,GO:0061158,GO:0010667,GO:0010976,GO:0001570,GO:0017124,GO:0003674,GO:0042552,GO:0003729	muscle cell differentiation|nucleus|long-chain fatty acid biosynthetic process|mRNA stabilization|cytoplasm|mRNA processing|spermatid development|brain development|axon ensheathment|positive regulation of oligodendrocyte differentiation|RNA splicing|mRNA transport|positive regulation of gene expression|3'-UTR-mediated mRNA destabilization|negative regulation of cardiac muscle cell apoptotic proce…
NONRATT000247.2	10.9429	3.45192	0.00276863	Up	Chr1	59145190	59146455	+	NM_001009687.1	0	sense	genic	exonic	nested	Riok2	GeneID:308201,Genbank:NM_001009687.1,RGD:1311588	RIO kinase 2	GO:0046777,GO:0005524,GO:0005575,GO:2000208,GO:0005634,GO:0005737,GO:0005829,GO:0008150,GO:0030071,GO:2000234,GO:0030490,GO:0030688,GO:0003674,GO:0004672,GO:0042274,GO:0004674	protein autophosphorylation|ATP binding|cellular_component|positive regulation of ribosomal small subunit export from nucleus|nucleus|cytoplasm|cytosol|biological_process|regulation of mitotic metaphase/anaphase transition|positive regulation of rRNA processing|maturation of SSU-rRNA|preribosome, small subunit precursor|molecular_function|protein kinase activity|ribosomal small subunit biogenesis…	rno03008	Ribosome biogenesis in eukaryotes
NONRATT000255.2	20.4764	4.35589	0.0198119	Up	Chr1	59718692	59719362	+	XM_017589728.1	0	sense	genic	exonic	overlapping	LOC688452	GeneID:688452,Genbank:XM_017589728.1,RGD:1588836	hypothetical protein LOC688452, transcript variant X2	GO:0007342,GO:0016021	fusion of sperm to egg plasma membrane involved in single fertilization|integral component of membrane
NONRATT000330.2	0.0659259	-3.92301	0.000540302	Down	Chr1	74021762	74022123	-	XM_344856.6	60331	sense	intergenic	upstream	same_strand	Nlrp4b	GeneID:365184,Genbank:XM_344856.6,RGD:1559894	NLR family, pyrin domain containing 4B	GO:0010468,GO:0023052,GO:0032088,GO:0035556,GO:0043122,GO:0045087,GO:0050727,GO:0050728,GO:0050777,GO:0001817,GO:0005737,GO:0006954	regulation of gene expression|signaling|negative regulation of NF-kappaB transcription factor activity|intracellular signal transduction|regulation of I-kappaB kinase/NF-kappaB signaling|innate immune response|regulation of inflammatory response|negative regulation of inflammatory response|negative regulation of immune response|regulation of cytokine production|cytoplasm|inflammatory response
NONRATT000346.2	6.13121	2.61617	0.00127667	Up	Chr1	73393936	73396095	-	XM_006228238.3	0	sense	genic	exonic	nested	Lilrb4	GeneID:292594,Genbank:XM_006228238.3,RGD:1359090	leukocyte immunoglobulin like receptor B4, transcript variant X1	GO:0050860,GO:1900181,GO:1902894,GO:0016021,GO:0045591,GO:0045671	negative regulation of T cell receptor signaling pathway|negative regulation of protein localization to nucleus|negative regulation of pri-miRNA transcription by RNA polymerase II|integral component of membrane|positive regulation of regulatory T cell differentiation|negative regulation of osteoclast differentiation	rno04380	Osteoclast differentiation
NONRATT000382.2	0	-Inf	0.0202499	Down	Chr1	78388539	78390911	+	XM_008759031.2	0	sense	genic	exonic	overlapping	Zc3h4	GeneID:678741,Genbank:XM_008759031.2,RGD:1596943	zinc finger CCCH-type containing 4, transcript variant X9	GO:0005654,GO:0005829,GO:0006357,GO:0045892,GO:0046872,GO:0001162,GO:0003700,GO:0005634	nucleoplasm|cytosol|regulation of transcription by RNA polymerase II|negative regulation of transcription, DNA-templated|metal ion binding|RNA polymerase II intronic transcription regulatory region sequence-specific DNA binding|DNA binding transcription factor activity|nucleus
NONRATT000391.2	0	-Inf	0.0025648	Down	Chr1	78818387	78818948	+	XM_006228384.3	0	sense	genic	exonic	nested	Gng8	GeneID:245986,Genbank:XM_006228384.3,RGD:620808	G protein subunit gamma 8, transcript variant X2	GO:0007399,GO:0035176,GO:0043584,GO:0071444,GO:0004871,GO:0005834,GO:0007186	nervous system development|social behavior|nose development|cellular response to pheromone|signal transducer activity|heterotrimeric G-protein complex|G-protein coupled receptor signaling pathway	rno04014,rno04371,rno04151,rno04062,rno04926,rno04724,rno04727,rno04725,rno04728,rno04726,rno04723,rno04713,rno05200,rno05032,rno05034,rno05167	Ras signaling pathway|Apelin signaling pathway|PI3K-Akt signaling pathway|Chemokine signaling pathway|Relaxin signaling pathway|Glutamatergic synapse|GABAergic synapse|Cholinergic synapse|Dopaminergic synapse|Serotonergic synapse|Retrograde endocannabinoid signaling|Circadian entrainment|Pathways in cancer|Morphine addiction|Alcoholism|Kaposi's sarcoma-associated herpesvirus infection
NONRATT000398.2	0.351307	-1.50919	0.00132947	Down	Chr1	78893278	78894021	+	XM_017589349.1	0	sense	genic	exonic	nested	Pnmal1	GeneID:361515,Genbank:XM_017589349.1,RGD:1310803	paraneoplastic Ma antigen family-like 1, transcript variant X1
NONRATT000532.2	0.123034	-3.02287	0.0115641	Down	Chr1	85114721	85116066	+	NM_001107496.1	0	sense	genic	exonic	nested	Dyrk1b	GeneID:308468,Genbank:NM_001107496.1,RGD:1307223	dual specificity tyrosine phosphorylation regulated kinase 1B	GO:0004713,GO:0005524,GO:0005634,GO:0006468,GO:0007520,GO:0018108,GO:0045893,GO:0060612,GO:0003713,GO:0004672,GO:0004674	protein tyrosine kinase activity|ATP binding|nucleus|protein phosphorylation|myoblast fusion|peptidyl-tyrosine phosphorylation|positive regulation of transcription, DNA-templated|adipose tissue development|transcription coactivator activity|protein kinase activity|protein serine/threonine kinase activity
NONRATT000675.2	0.0247755	-5.33494	0.00196203	Down	Chr1	100846271	100850220	+	XM_006229003.3	0	sense	genic	exonic	nested	Akt1s1	GeneID:292887,Genbank:XM_006229003.3,RGD:1312049	AKT1 substrate 1, transcript variant X1	GO:0045792,GO:0005737,GO:0048011,GO:0005829,GO:0006469,GO:0008150,GO:0031931,GO:0032007,GO:0032991,GO:0038202,GO:0005515,GO:0042981,GO:0005634,GO:0043523	negative regulation of cell size|cytoplasm|neurotrophin TRK receptor signaling pathway|cytosol|negative regulation of protein kinase activity|biological_process|TORC1 complex|negative regulation of TOR signaling|protein-containing complex|TORC1 signaling|protein binding|regulation of apoptotic process|nucleus|regulation of neuron apoptotic process	rno04152,rno04150,rno04140,rno04211,rno04213,rno04714	AMPK signaling pathway|mTOR signaling pathway|Autophagy - animal|Longevity regulating pathway - mammal|Longevity regulating pathway - multiple species|Thermogenesis
NONRATT000710.2	0.220492	-2.1812	0.00117968	Down	Chr1	101688780	101690849	+	NM_012543.3	0	sense	genic	exonic	nested	Dbp	GeneID:24309,Genbank:NM_012543.3,RGD:2491	D-box binding PAR bZIP transcription factor, transcript variant 1	GO:0001077,GO:0001889,GO:0003700,GO:0005634,GO:0006357,GO:0006366,GO:0007623,GO:0000977,GO:0045944	transcriptional activator activity, RNA polymerase II proximal promoter sequence-specific DNA binding|liver development|DNA binding transcription factor activity|nucleus|regulation of transcription by RNA polymerase II|transcription by RNA polymerase II|circadian rhythm|RNA polymerase II regulatory region sequence-specific DNA binding|positive regulation of transcription by RNA polymerase II
NONRATT000801.2	0.449718	-1.15291	0.0327281	Down	Chr1	135135610	135136550	+	XM_017590163.1	0	sense	genic	intronic	nested	Fam174b	GeneID:681398,Genbank:XM_017590163.1,RGD:1596692	family with sequence similarity 174, member B, transcript variant X1	GO:0016021	integral component of membrane
NONRATT000829.2	2.35515	1.23582	0.0147546	Up	Chr1	141239603	141255647	+	XM_008759561.2	50711	antisense	intergenic	upstream	divergent	Polg	GeneID:85472,Genbank:XM_008759561.2,RGD:620057	polymerase (DNA) gamma, catalytic subunit, transcript variant X1	GO:0090305,GO:0008408,GO:0003682,GO:0009416,GO:0003887,GO:0010332,GO:0004527,GO:0005739,GO:0042645,GO:0005760,GO:0006264,GO:0043195,GO:0055093,GO:0006287,GO:0002020,GO:0071333,GO:0007568,GO:0003677,GO:0071897	nucleic acid phosphodiester bond hydrolysis|3'-5' exonuclease activity|chromatin binding|response to light stimulus|DNA-directed DNA polymerase activity|response to gamma radiation|exonuclease activity|mitochondrion|mitochondrial nucleoid|gamma DNA polymerase complex|mitochondrial DNA replication|terminal bouton|response to hyperoxia|base-excision repair, gap-filling|protease binding|cellular res…
NONRATT000830.2	2.08289	1.05859	0.0360298	Up	Chr1	141255656	141256127	+	XM_008759561.2	66764	antisense	intergenic	upstream	divergent	Polg	GeneID:85472,Genbank:XM_008759561.2,RGD:620057	polymerase (DNA) gamma, catalytic subunit, transcript variant X1	GO:0090305,GO:0008408,GO:0003682,GO:0009416,GO:0003887,GO:0010332,GO:0004527,GO:0005739,GO:0042645,GO:0005760,GO:0006264,GO:0043195,GO:0055093,GO:0006287,GO:0002020,GO:0071333,GO:0007568,GO:0003677,GO:0071897	nucleic acid phosphodiester bond hydrolysis|3'-5' exonuclease activity|chromatin binding|response to light stimulus|DNA-directed DNA polymerase activity|response to gamma radiation|exonuclease activity|mitochondrion|mitochondrial nucleoid|gamma DNA polymerase complex|mitochondrial DNA replication|terminal bouton|response to hyperoxia|base-excision repair, gap-filling|protease binding|cellular res…
NONRATT000902.2	0.00736234	-7.08562	2.99918e-18	Down	ChrX	156711188	156713812	+	XM_017601935.1	0	sense	genic	exonic	nested	Mecp2	GeneID:29386,Genbank:XM_017601935.1,RGD:3075	methyl CpG binding protein 2, transcript variant X2	GO:0090063,GO:0098794,GO:1900114,GO:1901953,GO:1901956,GO:1903860,GO:1903861,GO:1905492,GO:1905643,GO:0016358,GO:0016525,GO:0016571,GO:0000792,GO:0000930,GO:0016573,GO:0001078,GO:0021591,GO:0019230,GO:0021740,GO:0001662,GO:0021756,GO:0019233,GO:0021766,GO:0003700,GO:0001666,GO:0021772,GO:0003729,GO:0021794,GO:0001964,GO:0021987,GO:0005515,GO:0033555,GO:0030182,GO:0005634,GO:0035067,GO:0031061,GO:…	positive regulation of microtubule nucleation|postsynapse|positive regulation of histone H3-K9 trimethylation|positive regulation of anterograde dense core granule transport|positive regulation of retrograde dense core granule transport|negative regulation of dendrite extension|positive regulation of dendrite extension|positive regulation of branching morphogenesis of a nerve|positive regulation …
NONRATT000914.2	2.20743	1.14237	0.0130677	Up	ChrX	156993124	156993591	+	NM_001135836.1	0	sense	genic	exonic	nested	Pdzd4	GeneID:293856,Genbank:NM_001135836.1,RGD:1561214	PDZ domain containing 4	GO:0016567,GO:0061630,GO:0005654,GO:0005730,GO:0005739	protein ubiquitination|ubiquitin protein ligase activity|nucleoplasm|nucleolus|mitochondrion
NONRATT000964.2	0	-Inf	0.000524773	Down	Chr1	161883528	161885091	+	XM_017589182.1	0	sense	genic	exonic	nested	Tenm4	GeneID:308831,Genbank:XM_017589182.1,RGD:1304658	teneurin transmembrane protein 4, transcript variant X11	GO:0048666,GO:0005737,GO:0005886,GO:0048714,GO:0005887,GO:0007157,GO:0007165,GO:0031641,GO:0031643,GO:0050839,GO:0032289,GO:0060038,GO:0042803,GO:0060912,GO:0097264,GO:0043005,GO:0000902,GO:2000543,GO:0001702,GO:0046982,GO:0005634	neuron development|cytoplasm|plasma membrane|positive regulation of oligodendrocyte differentiation|integral component of plasma membrane|heterophilic cell-cell adhesion via plasma membrane cell adhesion molecules|signal transduction|regulation of myelination|positive regulation of myelination|cell adhesion molecule binding|central nervous system myelin formation|cardiac muscle cell proliferation…
NONRATT001033.2	0.389372	-1.36078	0.00950804	Down	Chr1	166534641	166598571	+	NM_001143847.1	0	sense	genic	exonic	overlapping	Pde2a	GeneID:81743,Genbank:NM_001143847.1,RGD:620965	phosphodiesterase 2A, transcript variant 1	GO:0071320,GO:0071321,GO:0004118,GO:0071560,GO:0097011,GO:0005515,GO:0005634,GO:0097457,GO:1904613,GO:0005794,GO:0005737,GO:0005829,GO:0005886,GO:0010821,GO:0019933,GO:0019934,GO:0030224,GO:0000122,GO:0033159,GO:0030424,GO:0035690,GO:0030425,GO:0030552,GO:0003170,GO:0003279,GO:0035904,GO:0003281,GO:0036004,GO:0004112,GO:0036006,GO:0043951,GO:0004114,GO:0045121,GO:0042734,GO:0046069,GO:0046872,GO:…	cellular response to cAMP|cellular response to cGMP|cGMP-stimulated cyclic-nucleotide phosphodiesterase activity|cellular response to transforming growth factor beta stimulus|cellular response to granulocyte macrophage colony-stimulating factor stimulus|protein binding|nucleus|hippocampal mossy fiber|cellular response to 2,3,7,8-tetrachlorodibenzodioxine|Golgi apparatus|cytoplasm|cytosol|plasma m…	rno00230,rno04022,rno04925,rno04740,rno05032	Purine metabolism|cGMP - PKG signaling pathway|Aldosterone synthesis and secretion|Olfactory transduction|Morphine addiction
NONRATT001104.2	3.52896	1.81924	0.0108655	Up	Chr1	175976694	175980552	+	NM_001017374.2	81185	antisense	intergenic	upstream	divergent	Eif4g2	GeneID:361628,Genbank:NM_001017374.2,RGD:1305294	eukaryotic translation initiation factor 4, gamma 2	GO:0045296,GO:0005737,GO:0045727,GO:0005829,GO:0045773,GO:0005913,GO:0006413,GO:0006446,GO:0007507,GO:0060999,GO:0008135,GO:0010507,GO:0016281,GO:0030307,GO:0003674,GO:0030424,GO:0003743,GO:0034645,GO:0005575	cadherin binding|cytoplasm|positive regulation of translation|cytosol|positive regulation of axon extension|cell-cell adherens junction|translational initiation|regulation of translational initiation|heart development|positive regulation of dendritic spine development|translation factor activity, RNA binding|negative regulation of autophagy|eukaryotic translation initiation factor 4F complex|posi…	rno03013,rno05416	RNA transport|Viral myocarditis
NONRATT001106.2	12.6813	3.66463	0.000822333	Up	Chr1	175981026	175981783	+	NM_001017374.2	85517	antisense	intergenic	upstream	divergent	Eif4g2	GeneID:361628,Genbank:NM_001017374.2,RGD:1305294	eukaryotic translation initiation factor 4, gamma 2	GO:0045296,GO:0005737,GO:0045727,GO:0005829,GO:0045773,GO:0005913,GO:0006413,GO:0006446,GO:0007507,GO:0060999,GO:0008135,GO:0010507,GO:0016281,GO:0030307,GO:0003674,GO:0030424,GO:0003743,GO:0034645,GO:0005575	cadherin binding|cytoplasm|positive regulation of translation|cytosol|positive regulation of axon extension|cell-cell adherens junction|translational initiation|regulation of translational initiation|heart development|positive regulation of dendritic spine development|translation factor activity, RNA binding|negative regulation of autophagy|eukaryotic translation initiation factor 4F complex|posi…	rno03013,rno05416	RNA transport|Viral myocarditis
NONRATT001235.2	4.04468	2.01603	0.0167353	Up	Chr1	199287606	199293636	+	XM_006230346.3	0	sense	genic	exonic	nested	Stx4	GeneID:81803,Genbank:XM_006230346.3,RGD:621019	syntaxin 4, transcript variant X2	GO:0005515,GO:0005615,GO:0005622,GO:0005737,GO:0005768,GO:0009986,GO:0005802,GO:0012505,GO:0016020,GO:0005886,GO:0016021,GO:0016081,GO:0016230,GO:0031201,GO:0016323,GO:0031629,GO:0033194,GO:0035493,GO:0000149,GO:0043219,GO:0035749,GO:0043311,GO:0000322,GO:0045202,GO:0045335,GO:0005484,GO:0061025,GO:0045785,GO:0065003,GO:0071346,GO:0046907,GO:1902041,GO:1903078,GO:2000010,GO:0006886,GO:0006887,GO:…	protein binding|extracellular space|intracellular|cytoplasm|endosome|cell surface|trans-Golgi network|endomembrane system|membrane|plasma membrane|integral component of membrane|synaptic vesicle docking|sphingomyelin phosphodiesterase activator activity|SNARE complex|basolateral plasma membrane|synaptic vesicle fusion to presynaptic active zone membrane|response to hydroperoxide|SNARE complex ass…	rno04130,rno04962	SNARE interactions in vesicular transport|Vasopressin-regulated water reabsorption
NONRATT001245.2	0.287807	-1.79683	0.00980403	Down	Chr1	199412836	199420832	+	XM_006230290.3	0	sense	genic	exonic	nested	Fus	GeneID:317385,Genbank:XM_006230290.3,RGD:1308864	fused in sarcoma RNA binding protein, transcript variant X1	GO:0071277,GO:0042802,GO:0005634,GO:0043025,GO:0043197,GO:0005654,GO:0005737,GO:0005844,GO:0043204,GO:0006355,GO:0044327,GO:0008150,GO:0046872,GO:0030331,GO:0046965,GO:0030425,GO:0003712,GO:0046966,GO:0031489,GO:0003713,GO:0048471,GO:0035255,GO:0003723	cellular response to calcium ion|identical protein binding|nucleus|neuronal cell body|dendritic spine|nucleoplasm|cytoplasm|polysome|perikaryon|regulation of transcription, DNA-templated|dendritic spine head|biological_process|metal ion binding|estrogen receptor binding|retinoid X receptor binding|dendrite|transcription cofactor activity|thyroid hormone receptor binding|myosin V binding|transcrip…	rno05202	Transcriptional misregulation in cancers
NONRATT001248.2	0.371629	-1.42807	0.0420539	Down	Chr1	199424723	199426705	+	XM_006230290.3	0	sense	genic	exonic	nested	Fus	GeneID:317385,Genbank:XM_006230290.3,RGD:1308864	fused in sarcoma RNA binding protein, transcript variant X1	GO:0071277,GO:0042802,GO:0005634,GO:0043025,GO:0043197,GO:0005654,GO:0005737,GO:0005844,GO:0043204,GO:0006355,GO:0044327,GO:0008150,GO:0046872,GO:0030331,GO:0046965,GO:0030425,GO:0003712,GO:0046966,GO:0031489,GO:0003713,GO:0048471,GO:0035255,GO:0003723	cellular response to calcium ion|identical protein binding|nucleus|neuronal cell body|dendritic spine|nucleoplasm|cytoplasm|polysome|perikaryon|regulation of transcription, DNA-templated|dendritic spine head|biological_process|metal ion binding|estrogen receptor binding|retinoid X receptor binding|dendrite|transcription cofactor activity|thyroid hormone receptor binding|myosin V binding|transcrip…	rno05202	Transcriptional misregulation in cancers
NONRATT001257.2	0.224823	-2.15314	0.0236443	Down	Chr1	199884329	199885349	+	XM_006230313.3	18487	antisense	intergenic	upstream	divergent	Tial1	GeneID:361655,Genbank:XM_006230313.3,RGD:1595845	Tia1 cytotoxic granule-associated RNA binding protein-like 1, transcript variant X4	GO:0005634,GO:0005737,GO:0007281,GO:0008150,GO:0008284,GO:0010494,GO:0017091,GO:0017145,GO:0003674,GO:0003677	nucleus|cytoplasm|germ cell development|biological_process|positive regulation of cell proliferation|cytoplasmic stress granule|AU-rich element binding|stem cell division|molecular_function|DNA binding
NONRATT001310.2	52.5746	5.71629	0.000299948	Up	Chr1	209768928	209785793	+	XM_017589625.1	0	sense	genic	exonic	nested	Glrx3	GeneID:58815,Genbank:XM_017589625.1,RGD:69414	glutaredoxin 3, transcript variant X1	GO:0046872,GO:0005634,GO:0051536,GO:0005829,GO:0097428,GO:0005938,GO:0009055,GO:0010614,GO:0015035,GO:0022900,GO:0030018,GO:0030425,GO:0042802,GO:0044571,GO:0002026,GO:0005080,GO:0045454,GO:0005623	metal ion binding|nucleus|iron-sulfur cluster binding|cytosol|protein maturation by iron-sulfur cluster transfer|cell cortex|electron transfer activity|negative regulation of cardiac muscle hypertrophy|protein disulfide oxidoreductase activity|electron transport chain|Z disc|dendrite|identical protein binding|[2Fe-2S] cluster assembly|regulation of the force of heart contraction|protein kinase C …
NONRATT001311.2	36.1423	5.17561	0.0483376	Up	Chr1	209796895	209799912	+	XM_017589625.1	0	sense	genic	exonic	nested	Glrx3	GeneID:58815,Genbank:XM_017589625.1,RGD:69414	glutaredoxin 3, transcript variant X1	GO:0046872,GO:0005634,GO:0051536,GO:0005829,GO:0097428,GO:0005938,GO:0009055,GO:0010614,GO:0015035,GO:0022900,GO:0030018,GO:0030425,GO:0042802,GO:0044571,GO:0002026,GO:0005080,GO:0045454,GO:0005623	metal ion binding|nucleus|iron-sulfur cluster binding|cytosol|protein maturation by iron-sulfur cluster transfer|cell cortex|electron transfer activity|negative regulation of cardiac muscle hypertrophy|protein disulfide oxidoreductase activity|electron transport chain|Z disc|dendrite|identical protein binding|[2Fe-2S] cluster assembly|regulation of the force of heart contraction|protein kinase C …
NONRATT001412.2	10.1487	3.34322	0.0104554	Up	Chr1	219468743	219469331	+	NM_207615.2	0	sense	genic	exonic	overlapping	Clcf1	GeneID:365395,Genbank:NM_207615.2,RGD:1303171	cardiotrophin-like cytokine factor 1	GO:0097059,GO:0030890,GO:0005125,GO:0042531,GO:0005127,GO:0005576,GO:0005622,GO:0043524,GO:0007166,GO:0046982,GO:0048295,GO:0007259,GO:0048711,GO:0008284,GO:0002639,GO:0097058,GO:0010469,GO:0005102,GO:0030183	CNTFR-CLCF1 complex|positive regulation of B cell proliferation|cytokine activity|positive regulation of tyrosine phosphorylation of STAT protein|ciliary neurotrophic factor receptor binding|extracellular region|intracellular|negative regulation of neuron apoptotic process|cell surface receptor signaling pathway|protein heterodimerization activity|positive regulation of isotype switching to IgE i…	rno04060	Cytokine-cytokine receptor interaction
NONRATT001430.2	Inf	Inf	2.17034e-09	Up	Chr1	220749976	220750341	+	NM_001008305.1	0	sense	genic	exonic	nested	Eif1ad	GeneID:293673,Genbank:NM_001008305.1,RGD:1304686	eukaryotic translation initiation factor 1A domain containing	GO:0003743,GO:0005634,GO:0006413	translation initiation factor activity|nucleus|translational initiation
NONRATT001432.2	5.63146	2.49351	0.0121427	Up	Chr1	220835102	220836600	+	XM_008760199.2	0	antisense	genic	exonic	containing	Ccdc85b	GeneID:309161,Genbank:XM_008760199.2,RGD:1565319	coiled-coil domain containing 85B, transcript variant X2	GO:0045599,GO:0045892,GO:0005634,GO:0005813,GO:0030308	negative regulation of fat cell differentiation|negative regulation of transcription, DNA-templated|nucleus|centrosome|negative regulation of cell growth
NONRATT001441.2	0.490456	-1.0278	0.0463602	Down	Chr1	220891628	220892374	+	XM_008760202.2	825	antisense	intergenic	upstream	divergent	Snx32	GeneID:361708,Genbank:XM_008760202.2,RGD:1560591	sorting nexin 32, transcript variant X6	GO:0016050,GO:0019898,GO:0035091,GO:0005768,GO:0006897,GO:0015031	vesicle organization|extrinsic component of membrane|phosphatidylinositol binding|endosome|endocytosis|protein transport	rno04144	Endocytosis
NONRATT001500.2	2.55828	1.35517	0.0441514	Up	Chr1	224921331	224923228	+	NM_019283.3	303	antisense	intergenic	upstream	divergent	Slc3a2	GeneID:50567,Genbank:NM_019283.3,RGD:3073	solute carrier family 3 member 2, transcript variant 1	GO:0016021,GO:0005634,GO:0016324,GO:0005829,GO:0042470,GO:0005886,GO:0005975,GO:0043330,GO:0009986,GO:0045296,GO:0015175,GO:1903801,GO:0015804,GO:0003725,GO:0015827,GO:0003824,GO:0016020	integral component of membrane|nucleus|apical plasma membrane|cytosol|melanosome|plasma membrane|carbohydrate metabolic process|response to exogenous dsRNA|cell surface|cadherin binding|neutral amino acid transmembrane transporter activity|L-leucine import across plasma membrane|neutral amino acid transport|double-stranded RNA binding|tryptophan transport|catalytic activity|membrane	rno04150,rno04216,rno04974	mTOR signaling pathway|Ferroptosis|Protein digestion and absorption
NONRATT001547.2	0.46814	-1.09499	0.0444456	Down	Chr1	226495377	226496373	+	XM_017589635.1	0	sense	genic	exonic	nested	Syt7	GeneID:59267,Genbank:XM_017589635.1,RGD:62013	synaptotagmin 7, transcript variant X3	GO:0005516,GO:0005544,GO:0005546,GO:0005764,GO:0016021,GO:0017156,GO:0005765,GO:0017158,GO:0005777,GO:0019905,GO:0030054,GO:0030276,GO:0046850,GO:0030425,GO:0030670,GO:0048791,GO:0030672,GO:0050764,GO:0050796,GO:0000149,GO:0001778,GO:0070092,GO:0001786,GO:0005509,GO:0005513,GO:0005515,GO:0005778,GO:0005829,GO:0005886,GO:0006909,GO:0031045,GO:0008021,GO:0032009,GO:0014059,GO:0036465,GO:0042734,GO:…	calmodulin binding|calcium-dependent phospholipid binding|phosphatidylinositol-4,5-bisphosphate binding|lysosome|integral component of membrane|calcium ion regulated exocytosis|lysosomal membrane|regulation of calcium ion-dependent exocytosis|peroxisome|syntaxin binding|cell junction|clathrin binding|regulation of bone remodeling|dendrite|phagocytic vesicle membrane|calcium ion-regulated exocytos…
NONRATT001590.2	0	-Inf	0.00022911	Down	Chr1	57382301	57390349	+	XM_006231141.3	0	sense	genic	exonic	nested	Fam120b	GeneID:308218,Genbank:XM_006231141.3,RGD:1310304	family with sequence similarity 120B, transcript variant X1	GO:0035357,GO:0045444,GO:0005634	peroxisome proliferator activated receptor signaling pathway|fat cell differentiation|nucleus
NONRATT001608.2	0.402796	-1.31188	0.00556016	Down	Chr1	240758929	240760598	+	NM_001191562.1	1347	sense	intergenic	downstream	same_strand	Trpm3	GeneID:309407,Genbank:NM_001191562.1,RGD:1304888	transient receptor potential cation channel, subfamily M, member 3	GO:0016021,GO:0016048,GO:0050951,GO:0051262,GO:0098655,GO:0005227,GO:0005261,GO:0006812	integral component of membrane|detection of temperature stimulus|sensory perception of temperature stimulus|protein tetramerization|cation transmembrane transport|calcium activated cation channel activity|cation channel activity|cation transport
NONRATT001609.2	0.365522	-1.45197	0.0377331	Down	Chr1	240761511	240762558	+	NM_001191562.1	3929	sense	intergenic	downstream	same_strand	Trpm3	GeneID:309407,Genbank:NM_001191562.1,RGD:1304888	transient receptor potential cation channel, subfamily M, member 3	GO:0016021,GO:0016048,GO:0050951,GO:0051262,GO:0098655,GO:0005227,GO:0005261,GO:0006812	integral component of membrane|detection of temperature stimulus|sensory perception of temperature stimulus|protein tetramerization|cation transmembrane transport|calcium activated cation channel activity|cation channel activity|cation transport
NONRATT001742.2	2.65875	1.41075	0.0255192	Up	Chr1	261434057	261435821	+	XM_006231392.3	0	sense	genic	exonic	nested	Zfyve27	GeneID:309376,Genbank:XM_006231392.3,RGD:735177	zinc finger FYVE-type containing 27, transcript variant X1	GO:0016192,GO:0030176,GO:0030424,GO:0045773,GO:0030425,GO:0046872,GO:0048011,GO:0055038,GO:0071782,GO:0071787,GO:0005654,GO:0005737,GO:0005783,GO:0005829,GO:0016021,GO:0031175,GO:0032584,GO:0043621,GO:0072659	vesicle-mediated transport|integral component of endoplasmic reticulum membrane|axon|positive regulation of axon extension|dendrite|metal ion binding|neurotrophin TRK receptor signaling pathway|recycling endosome membrane|endoplasmic reticulum tubular network|endoplasmic reticulum tubular network formation|nucleoplasm|cytoplasm|endoplasmic reticulum|cytosol|integral component of membrane|neuron p…	rno04144	Endocytosis
NONRATT001744.2	Inf	Inf	0.0255024	Up	Chr1	261502699	261509676	+	XM_006231421.2	0	sense	genic	exonic	nested	Golga7b	GeneID:309378,Genbank:XM_006231421.2,RGD:1583839	golgin A7 family, member B, transcript variant X1	GO:0018230,GO:0019706,GO:0072659,GO:0002178,GO:0005622,GO:0006612	peptidyl-L-cysteine S-palmitoylation|protein-cysteine S-palmitoyltransferase activity|protein localization to plasma membrane|palmitoyltransferase complex|intracellular|protein targeting to membrane
NONRATT001764.2	Inf	Inf	0.0186788	Up	Chr1	264721554	264733472	+	XM_006231550.3	0	sense	genic	exonic	overlapping	Slf2	GeneID:499360,Genbank:XM_006231550.3,RGD:1560300	SMC5-SMC6 complex localization factor 2, transcript variant X1	GO:0031334,GO:0031625,GO:0034184,GO:0035861,GO:0043231,GO:0044877,GO:1990166,GO:2000781,GO:0000785,GO:0005634,GO:0006974	positive regulation of protein complex assembly|ubiquitin protein ligase binding|positive regulation of maintenance of mitotic sister chromatid cohesion|site of double-strand break|intracellular membrane-bounded organelle|protein-containing complex binding|protein localization to site of double-strand break|positive regulation of double-strand break repair|chromatin|nucleus|cellular response to D…
NONRATT001917.2	0.00673265	-7.21461	2.90449e-06	Down	Chr1	237487	237792	-	XM_017589815.1	117	sense	intergenic	downstream	same_strand	LOC108349479	GeneID:108349479,Genbank:XM_017589815.1	zinc finger protein 431-like, transcript variant X1
NONRATT001938.2	0.274503	-1.86511	0.000545753	Down	Chr1	3858910	3860561	-	XM_008758628.2	0	sense	genic	exonic	overlapping	Stxbp5	GeneID:81022,Genbank:XM_008758628.2,RGD:708517	syntaxin binding protein 5, transcript variant X3	GO:0030054,GO:0005829,GO:0030141,GO:0005886,GO:0030659,GO:0005892,GO:0006887,GO:0008021,GO:0015031,GO:0017075,GO:0043547,GO:0045921,GO:0017137,GO:0017157,GO:0050708,GO:0005096,GO:0019905,GO:0005737	cell junction|cytosol|secretory granule|plasma membrane|cytoplasmic vesicle membrane|acetylcholine-gated channel complex|exocytosis|synaptic vesicle|protein transport|syntaxin-1 binding|positive regulation of GTPase activity|positive regulation of exocytosis|Rab GTPase binding|regulation of exocytosis|regulation of protein secretion|GTPase activator activity|syntaxin binding|cytoplasm
NONRATT001970.2	0	-Inf	0.000288612	Down	Chr1	13839013	13839780	-	XM_006227651.3	0	sense	genic	exonic	nested	Arfgef3	GeneID:292947,Genbank:XM_006227651.3,RGD:1309903	ARFGEF family member 3, transcript variant X1	GO:0005086,GO:0010923,GO:0032012	ARF guanyl-nucleotide exchange factor activity|negative regulation of phosphatase activity|regulation of ARF protein signal transduction
NONRATT002002.2	0.444279	-1.17046	0.0317129	Down	Chr1	21032928	21033652	-	XM_017589862.1	0	sense	genic	intronic	nested	Epb41l2	GeneID:309557,Genbank:XM_017589862.1,RGD:1563977	erythrocyte membrane protein band 4.1-like 2, transcript variant X21	GO:0099738,GO:0005634,GO:1904778,GO:0005654,GO:0005856,GO:0005886,GO:0008180,GO:0030054,GO:0030507,GO:0030866,GO:0003779,GO:0031032,GO:0005198,GO:0042731,GO:0005200	cell cortex region|nucleus|positive regulation of protein localization to cell cortex|nucleoplasm|cytoskeleton|plasma membrane|COP9 signalosome|cell junction|spectrin binding|cortical actin cytoskeleton organization|actin binding|actomyosin structure organization|structural molecule activity|PH domain binding|structural constituent of cytoskeleton
NONRATT002098.2	0.384176	-1.38016	0.00168447	Down	Chr1	41608639	41619824	-	XM_008758713.2	0	sense	genic	exonic	nested	Syne1	GeneID:499010,Genbank:XM_008758713.2,RGD:620546	spectrin repeat containing nuclear envelope protein 1, transcript variant X2	GO:0005654,GO:0005730,GO:0005737,GO:0005794,GO:0005819,GO:0007030,GO:0042803,GO:0007097,GO:0043197,GO:0007420,GO:0044327,GO:0009416,GO:0045211,GO:0048260,GO:0048471,GO:0048814,GO:0051015,GO:0051642,GO:0055007,GO:0000932,GO:0002053,GO:0003779,GO:0005102,GO:0005198,GO:0005515,GO:0005521,GO:0005635,GO:0016021,GO:0019899,GO:0030017,GO:0030496,GO:0031965,GO:0061886,GO:0034993,GO:0090286,GO:0042692,GO:…	nucleoplasm|nucleolus|cytoplasm|Golgi apparatus|spindle|Golgi organization|protein homodimerization activity|nuclear migration|dendritic spine|brain development|dendritic spine head|response to light stimulus|postsynaptic membrane|positive regulation of receptor-mediated endocytosis|perinuclear region of cytoplasm|regulation of dendrite morphogenesis|actin filament binding|centrosome localization…
NONRATT002257.2	0.415872	-1.26579	0.0072274	Down	Chr1	66701976	67110321	-	NM_001008939.1	0	sense	genic	intronic	containing	Vom1r46	GeneID:494286,Genbank:NM_001008939.1,RGD:1359306	vomeronasal 1 receptor 46	GO:0016021,GO:0016503,GO:0019236,GO:0005886,GO:0007186,GO:0007606	integral component of membrane|pheromone receptor activity|response to pheromone|plasma membrane|G-protein coupled receptor signaling pathway|sensory perception of chemical stimulus
NONRATT002270.2	0	-Inf	0.0349423	Down	Chr1	71114024	71115330	-	XM_017589551.1	0	sense	genic	exonic	nested	Smim17	GeneID:499067,Genbank:XM_017589551.1,RGD:1559613	small integral membrane protein 17, transcript variant X3	GO:0016021	integral component of membrane
NONRATT002347.2	Inf	Inf	0.0431561	Up	Chr1	79964759	79965437	-	NM_001024748.1	0	antisense	genic	intronic	nested	Rsph6a	GeneID:292684,Genbank:NM_001024748.1,RGD:1306786	radial spoke head 6 homolog A	GO:0005622	intracellular
NONRATT002354.2	3.28059	1.71395	0.0347248	Up	Chr1	80214468	80215287	-	NM_001256509.1	0	sense	genic	exonic	overlapping	Fosb	GeneID:100360880,Genbank:NM_001256509.1,RGD:1308198	FosB proto-oncogene, AP-1 transcription factor subunit	GO:0071277,GO:0032570,GO:0001077,GO:0032870,GO:0003677,GO:0042493,GO:0003690,GO:0003700,GO:0005634,GO:0043231,GO:0005654,GO:0043278,GO:0043565,GO:0006357,GO:0045944,GO:0006366,GO:0000978,GO:0051412,GO:0007565,GO:0051591,GO:0009612,GO:0000982	cellular response to calcium ion|response to progesterone|transcriptional activator activity, RNA polymerase II proximal promoter sequence-specific DNA binding|cellular response to hormone stimulus|DNA binding|response to drug|double-stranded DNA binding|DNA binding transcription factor activity|nucleus|intracellular membrane-bounded organelle|nucleoplasm|response to morphine|sequence-specific DN…	rno04657,rno04380,rno05030,rno05031,rno05034	IL-17 signaling pathway|Osteoclast differentiation|Cocaine addiction|Amphetamine addiction|Alcoholism
NONRATT002395.2	0.329287	-1.60258	0.0347556	Down	Chr1	81961992	81963702	-	XM_006228372.2	3089	sense	intergenic	downstream	same_strand	Pou2f2	GeneID:117058,Genbank:XM_006228372.2,RGD:621690	POU class 2 homeobox 2, transcript variant X11	GO:0043565,GO:0002380,GO:0003677,GO:0045893,GO:0003700,GO:0005634,GO:0005654,GO:0045944,GO:0048305,GO:0006355,GO:0048469,GO:0006366,GO:0000978,GO:0019904,GO:0001077,GO:0043231,GO:0002335	sequence-specific DNA binding|immunoglobulin secretion involved in immune response|DNA binding|positive regulation of transcription, DNA-templated|DNA binding transcription factor activity|nucleus|nucleoplasm|positive regulation of transcription by RNA polymerase II|immunoglobulin secretion|regulation of transcription, DNA-templated|cell maturation|transcription by RNA polymerase II|RNA polymeras…
NONRATT002396.2	0.197805	-2.33785	0.0261286	Down	Chr1	81964332	81964910	-	XM_006228372.2	1881	sense	intergenic	downstream	same_strand	Pou2f2	GeneID:117058,Genbank:XM_006228372.2,RGD:621690	POU class 2 homeobox 2, transcript variant X11	GO:0043565,GO:0002380,GO:0003677,GO:0045893,GO:0003700,GO:0005634,GO:0005654,GO:0045944,GO:0048305,GO:0006355,GO:0048469,GO:0006366,GO:0000978,GO:0019904,GO:0001077,GO:0043231,GO:0002335	sequence-specific DNA binding|immunoglobulin secretion involved in immune response|DNA binding|positive regulation of transcription, DNA-templated|DNA binding transcription factor activity|nucleus|nucleoplasm|positive regulation of transcription by RNA polymerase II|immunoglobulin secretion|regulation of transcription, DNA-templated|cell maturation|transcription by RNA polymerase II|RNA polymeras…
NONRATT002424.2	30.3595	4.92408	0.00559693	Up	Chr1	82595204	82596678	-	NM_001107495.1	0	sense	genic	exonic	overlapping	Cyp2s1	GeneID:308445,Genbank:NM_001107495.1,RGD:1306078	cytochrome P450, family 2, subfamily s, polypeptide 1	GO:0042738,GO:0005783,GO:0043231,GO:0006082,GO:0006805,GO:0008150,GO:0008392,GO:0008395,GO:0055114,GO:0016021,GO:0016712,GO:0019373,GO:0003674,GO:0020037,GO:0005506,GO:0005737	exogenous drug catabolic process|endoplasmic reticulum|intracellular membrane-bounded organelle|organic acid metabolic process|xenobiotic metabolic process|biological_process|arachidonic acid epoxygenase activity|steroid hydroxylase activity|oxidation-reduction process|integral component of membrane|oxidoreductase activity, acting on paired donors, with incorporation or reduction of molecular oxy…	rno00830,rno00980	Retinol metabolism|Metabolism of xenobiotics by cytochrome P450
NONRATT002433.2	6.14842	2.62022	0.0492175	Up	Chr1	84154702	84155952	-	NM_001271080.1	0	sense	genic	exonic	nested	Shkbp1	GeneID:292735,Genbank:NM_001271080.1,RGD:1309281	Sh3kbp1 binding protein 1	GO:0045742,GO:0051260,GO:0005764	positive regulation of epidermal growth factor receptor signaling pathway|protein homooligomerization|lysosome
NONRATT002507.2	0.321481	-1.6372	0.0335772	Down	Chr1	88977434	88977876	-	XM_008759253.2	0	sense	genic	exonic	overlapping	Arhgap33	GeneID:100362311,Genbank:XM_008759253.2,RGD:2318374	Rho GTPase activating protein 33, transcript variant X1	GO:0043197,GO:0005737,GO:0043547,GO:0061001,GO:0005886,GO:0005938,GO:0007264,GO:0009636,GO:0015031,GO:0015629,GO:0019901,GO:0032991,GO:0005096,GO:0035091,GO:0005515	dendritic spine|cytoplasm|positive regulation of GTPase activity|regulation of dendritic spine morphogenesis|plasma membrane|cell cortex|small GTPase mediated signal transduction|response to toxic substance|protein transport|actin cytoskeleton|protein kinase binding|protein-containing complex|GTPase activator activity|phosphatidylinositol binding|protein binding
NONRATT002532.2	0.29979	-1.73798	0.027114	Down	Chr1	89484199	89485705	-	XM_008759184.2	0	sense	genic	exonic	nested	Fxyd1	GeneID:58971,Genbank:XM_008759184.2,RGD:69306	FXYD domain-containing ion transport regulator 1, transcript variant X5	GO:2000649,GO:0051480,GO:0017080,GO:0005887,GO:0086004,GO:0005890,GO:0086036,GO:0030315,GO:0005901,GO:0006813,GO:0006814,GO:0007420,GO:0010734,GO:0032892,GO:1903278,GO:0034220,GO:0014704,GO:0042383,GO:0016021,GO:0016324,GO:0005216,GO:1903406,GO:0017022,GO:0005515,GO:1903797,GO:0051117,GO:0005886	regulation of sodium ion transmembrane transporter activity|regulation of cytosolic calcium ion concentration|sodium channel regulator activity|integral component of plasma membrane|regulation of cardiac muscle cell contraction|sodium:potassium-exchanging ATPase complex|regulation of cardiac muscle cell membrane potential|T-tubule|caveola|potassium ion transport|sodium ion transport|brain develop…	rno04024	cAMP signaling pathway
NONRATT002653.2	18.8318	4.2351	9.96833e-07	Up	Chr1	101491751	101500785	-	XM_006229163.1	0	sense	genic	exonic	nested	Nucb1	GeneID:84595,Genbank:XM_006229163.1,RGD:620030	nucleobindin 1, transcript variant X3	GO:0072718,GO:0005515,GO:0090498,GO:0005576,GO:0098547,GO:0005615,GO:0005634,GO:0005737,GO:0005769,GO:0005791,GO:1903533,GO:0005793,GO:0005794,GO:0005798,GO:0005801,GO:0001965,GO:0005802,GO:0003677,GO:0032580,GO:0005509	response to cisplatin|protein binding|extrinsic component of Golgi membrane|extracellular region|lumenal side of Golgi membrane|extracellular space|nucleus|cytoplasm|early endosome|rough endoplasmic reticulum|regulation of protein targeting|endoplasmic reticulum-Golgi intermediate compartment|Golgi apparatus|Golgi-associated vesicle|cis-Golgi network|G-protein alpha-subunit binding|trans-Golgi ne…
NONRATT002654.2	9.28828	3.21541	5.01696e-06	Up	Chr1	101511906	101512391	-	XM_006228974.3	0	sense	genic	exonic	nested	Ppp1r15a	GeneID:171071,Genbank:XM_006228974.3,RGD:621526	protein phosphatase 1, regulatory subunit 15A, transcript variant X1	GO:0005783,GO:0005789,GO:0005794,GO:0005829,GO:0006915,GO:0007568,GO:0030968,GO:0008157,GO:0032515,GO:0032516,GO:0008285,GO:0033138,GO:0034644,GO:0034976,GO:0070262,GO:0070972,GO:0071236,GO:0035308,GO:0071322,GO:0071407,GO:0072703,GO:0072732,GO:0000164,GO:0090648,GO:0090650,GO:0001934,GO:1902310,GO:0005515,GO:0005737,GO:0005739,GO:0005741,GO:0010628,GO:0010801,GO:0010955,GO:0014070,GO:0016020,GO:…	endoplasmic reticulum|endoplasmic reticulum membrane|Golgi apparatus|cytosol|apoptotic process|aging|endoplasmic reticulum unfolded protein response|protein phosphatase 1 binding|negative regulation of phosphoprotein phosphatase activity|positive regulation of phosphoprotein phosphatase activity|negative regulation of cell proliferation|positive regulation of peptidyl-serine phosphorylation|cellu…	rno04141	Protein processing in endoplasmic reticulum
NONRATT002772.2	4.20977	2.07374	0.00248712	Up	Chr1	137325458	137326247	-	XM_006229381.3	7633	sense	intergenic	downstream	same_strand	Klhl25	GeneID:293023,Genbank:XM_006229381.3,RGD:1310815	kelch-like family member 25, transcript variant X4	GO:0006446,GO:0006511,GO:0010499,GO:0016567,GO:0031463,GO:0005737	regulation of translational initiation|ubiquitin-dependent protein catabolic process|proteasomal ubiquitin-independent protein catabolic process|protein ubiquitination|Cul3-RING ubiquitin ligase complex|cytoplasm
NONRATT002805.2	4.1935	2.06815	0.00262505	Up	Chr1	142026571	142027076	-	XM_218822.8	0	antisense	genic	intronic	nested	Gdpgp1	GeneID:308763,Genbank:XM_218822.8,RGD:1560277	GDP-D-glucose phosphorylase 1, transcript variant X1	GO:0006006,GO:0080048	glucose metabolic process|GDP-D-glucose phosphorylase activity
NONRATT002830.2	0.165132	-2.59831	0.00116748	Down	Chr1	143185606	143196771	-	XM_017588941.1	0	sense	genic	exonic	nested	Cpeb1	GeneID:293056,Genbank:XM_017588941.1,RGD:1310421	cytoplasmic polyadenylation element binding protein 1, transcript variant X5	GO:0005634,GO:0005654,GO:0005737,GO:0030054,GO:0005813,GO:0030335,GO:0005829,GO:0030426,GO:0006397,GO:0032869,GO:0035925,GO:0071230,GO:0043005,GO:0043022,GO:0071456,GO:0043025,GO:0072687,GO:1990124,GO:2000766,GO:0000900,GO:0000932,GO:0003723,GO:0003729,GO:0003730,GO:0006412,GO:0006417,GO:0007130,GO:0008135,GO:0008285,GO:0010976,GO:0045182,GO:0014069,GO:0045202,GO:0016020,GO:0045211,GO:0017148,GO:…	nucleus|nucleoplasm|cytoplasm|cell junction|centrosome|positive regulation of cell migration|cytosol|growth cone|mRNA processing|cellular response to insulin stimulus|mRNA 3'-UTR AU-rich region binding|cellular response to amino acid stimulus|neuron projection|ribosome binding|cellular response to hypoxia|neuronal cell body|meiotic spindle|messenger ribonucleoprotein complex|negative regulation o…	rno04114,rno04914	Oocyte meiosis|Progesterone-mediated oocyte maturation
NONRATT002944.2	Inf	Inf	0.0463509	Up	Chr1	163163318	163169898	-	XM_017590188.1	0	sense	genic	exonic	nested	Acer3	GeneID:499210,Genbank:XM_017590188.1,RGD:1561254	alkaline ceramidase 3, transcript variant X2	GO:0008150,GO:0008284,GO:0030173,GO:0030176,GO:0046512,GO:0070774,GO:0071602,GO:0003674,GO:0005575,GO:0006672	biological_process|positive regulation of cell proliferation|integral component of Golgi membrane|integral component of endoplasmic reticulum membrane|sphingosine biosynthetic process|phytoceramidase activity|phytosphingosine biosynthetic process|molecular_function|cellular_component|ceramide metabolic process	rno00600	Sphingolipid metabolism
NONRATT003046.2	2.03299	1.02361	0.0249107	Up	Chr1	171994350	171995362	-	XM_574528.6	1044	sense	intergenic	downstream	same_strand	LOC499235	GeneID:499235,Genbank:XM_574528.6,RGD:1565730	LRRGT00141	GO:0006006,GO:0006355,GO:0008284,GO:0008285,GO:0043066,GO:0043525,GO:0043565,GO:0045595,GO:0045892,GO:0045944,GO:0046983,GO:0000122,GO:0050796,GO:0003700,GO:0005634	glucose metabolic process|regulation of transcription, DNA-templated|positive regulation of cell proliferation|negative regulation of cell proliferation|negative regulation of apoptotic process|positive regulation of neuron apoptotic process|sequence-specific DNA binding|regulation of cell differentiation|negative regulation of transcription, DNA-templated|positive regulation of transcription by …
NONRATT003093.2	0.0397796	-4.65183	0.00692622	Down	Chr1	188034613	188035471	-	NM_138849.1	0	sense	genic	exonic	overlapping	Syt17	GeneID:192189,Genbank:NM_138849.1,RGD:708576	synaptotagmin 17	GO:0005886,GO:0006887,GO:0006906,GO:0016020,GO:0016079,GO:0017158,GO:0019905,GO:0030276,GO:0030672,GO:0048488,GO:0048791,GO:0005509,GO:0098793,GO:0005544,GO:1903861,GO:0005802	plasma membrane|exocytosis|vesicle fusion|membrane|synaptic vesicle exocytosis|regulation of calcium ion-dependent exocytosis|syntaxin binding|clathrin binding|synaptic vesicle membrane|synaptic vesicle endocytosis|calcium ion-regulated exocytosis of neurotransmitter|calcium ion binding|presynapse|calcium-dependent phospholipid binding|positive regulation of dendrite extension|trans-Golgi network
NONRATT003139.2	0.0875902	-3.51309	0.0086274	Down	Chr1	195109507	195110008	-	NM_001270712.1	12814	sense	intergenic	upstream	same_strand	Snurf	GeneID:113938,Genbank:NM_001270712.1,RGD:69269	SNRPN upstream reading frame, transcript variant 1	GO:0016607,GO:0051117,GO:0005634,GO:0005654	nuclear speck|ATPase binding|nucleus|nucleoplasm
NONRATT003145.2	0.363727	-1.45907	0.00295172	Down	Chr1	197269472	197270901	-	XM_008759923.2	803	sense	intergenic	downstream	same_strand	Gsg1l	GeneID:499263,Genbank:XM_008759923.2,RGD:1562278	GSG1-like, transcript variant X1	GO:0032279,GO:0098962,GO:0099061,GO:2000311,GO:0014069,GO:0030054	asymmetric synapse|regulation of postsynaptic neurotransmitter receptor activity|integral component of postsynaptic density membrane|regulation of AMPA receptor activity|postsynaptic density|cell junction
NONRATT003193.2	4.59791	2.20098	0.000675082	Up	Chr1	198461405	198462033	-	NM_001009645.1	0	sense	genic	exonic	nested	Kif22	GeneID:293502,Genbank:NM_001009645.1,RGD:1311886	kinesin family member 22	GO:0007080,GO:0005524,GO:0008017,GO:0005819,GO:0005829,GO:0005871,GO:0005874,GO:0016607,GO:0005929,GO:0006281,GO:0016887,GO:0007018,GO:0051310,GO:0007062,GO:0000785,GO:0003677,GO:0072686,GO:0003777	mitotic metaphase plate congression|ATP binding|microtubule binding|spindle|cytosol|kinesin complex|microtubule|nuclear speck|cilium|DNA repair|ATPase activity|microtubule-based movement|metaphase plate congression|sister chromatid cohesion|chromatin|DNA binding|mitotic spindle|microtubule motor activity	rno04914	Progesterone-mediated oocyte maturation
NONRATT003225.2	2.05371	1.03823	0.0158607	Up	Chr1	199251841	199253887	-	XM_017588798.1	0	sense	genic	exonic	nested	Stx1b	GeneID:24923,Genbank:XM_017588798.1,RGD:3784	syntaxin 1B, transcript variant X1	GO:0005654,GO:0005737,GO:0005813,GO:0005886,GO:0006886,GO:0016020,GO:0006887,GO:0016021,GO:0006904,GO:0016081,GO:0016192,GO:0017157,GO:0019901,GO:0098967,GO:0019904,GO:1903422,GO:0030424,GO:1904050,GO:0031201,GO:1905302,GO:2000463,GO:0000149,GO:0001956,GO:0005102,GO:0005484,GO:0005515,GO:0005634,GO:0005652,GO:0006906,GO:0008021,GO:0010468,GO:0010807,GO:0010977,GO:0031629,GO:0012505,GO:0015031,GO:…	nucleoplasm|cytoplasm|centrosome|plasma membrane|intracellular protein transport|membrane|exocytosis|integral component of membrane|vesicle docking involved in exocytosis|synaptic vesicle docking|vesicle-mediated transport|regulation of exocytosis|protein kinase binding|exocytic insertion of neurotransmitter receptor to postsynaptic membrane|protein domain specific binding|negative regulation of …	rno04130,rno04721	SNARE interactions in vesicular transport|Synaptic vesicle cycle
NONRATT003230.2	Inf	Inf	0.0123064	Up	Chr1	199334479	199335295	-	XM_017589572.1	0	sense	genic	exonic	nested	Prss53	GeneID:499270,Genbank:XM_017589572.1,RGD:1566127	protease, serine, 53, transcript variant X3	GO:0004252,GO:0005737,GO:0006508	serine-type endopeptidase activity|cytoplasm|proteolysis
NONRATT003238.2	2.89677	1.53445	0.0391789	Up	Chr1	199687761	199691955	-	NM_001035517.1	0	sense	genic	exonic	overlapping	RGD1310127	GeneID:361654,Genbank:NM_001035517.1,RGD:1310127	similar to cDNA sequence BC017158	GO:0016021	integral component of membrane
NONRATT003349.2	2.01876	1.01347	0.0383799	Up	Chr1	214386697	214387913	-	NM_031811.3	812	antisense	intergenic	downstream	convergent	Taldo1	GeneID:83688,Genbank:NM_031811.3,RGD:620674	transaldolase 1	GO:0005654,GO:0005829,GO:0005975,GO:0006002,GO:0006098,GO:0009052,GO:0019682,GO:0030246,GO:0043231,GO:0004801,GO:0048029,GO:0005634	nucleoplasm|cytosol|carbohydrate metabolic process|fructose 6-phosphate metabolic process|pentose-phosphate shunt|pentose-phosphate shunt, non-oxidative branch|glyceraldehyde-3-phosphate metabolic process|carbohydrate binding|intracellular membrane-bounded organelle|sedoheptulose-7-phosphate:D-glyceraldehyde-3-phosphate glyceronetransferase activity|monosaccharide binding|nucleus	rno00030	Pentose phosphate pathway
NONRATT003404.2	0.0516159	-4.27604	0.0421192	Down	Chr1	219135326	219136498	-	XM_006230727.2	0	sense	genic	exonic	nested	Tcirg1	GeneID:293650,Genbank:XM_006230727.2,RGD:735136	T-cell immune regulator 1, ATPase H+ transporting V0 subunit A3, transcript variant X1	GO:0070072,GO:0005886,GO:1902600,GO:0007035,GO:0007039,GO:0015078,GO:0015986,GO:0015991,GO:0016021,GO:0016236,GO:0016324,GO:0016471,GO:0033179,GO:0000220,GO:0046961,GO:0005575,GO:0051117	vacuolar proton-transporting V-type ATPase complex assembly|plasma membrane|proton transmembrane transport|vacuolar acidification|protein catabolic process in the vacuole|proton transmembrane transporter activity|ATP synthesis coupled proton transport|ATP hydrolysis coupled proton transport|integral component of membrane|macroautophagy|apical plasma membrane|vacuolar proton-transporting V-type AT…	rno00190,rno04145,rno04142,rno04966,rno04721,rno05323,rno05152,rno05165	Oxidative phosphorylation|Phagosome|Lysosome|Collecting duct acid secretion|Synaptic vesicle cycle|Rheumatoid arthritis|Tuberculosis|Human papillomavirus infection
NONRATT003435.2	4.29746	2.10348	0.00894726	Up	Chr1	219861440	219863891	-	NM_001100585.1	0	sense	genic	exonic	nested	Rce1	GeneID:309153,Genbank:NM_001100585.1,RGD:1309261	Ras converting CAAX endopeptidase 1	GO:0004197,GO:0004222,GO:0005789,GO:0016021,GO:0030176,GO:0071586,GO:0004175	cysteine-type endopeptidase activity|metalloendopeptidase activity|endoplasmic reticulum membrane|integral component of membrane|integral component of endoplasmic reticulum membrane|CAAX-box protein processing|endopeptidase activity	rno00900	Terpenoid backbone biosynthesis
NONRATT003517.2	0	-Inf	0.0334152	Down	Chr1	222237000	222240328	-	XM_006230910.3	0	sense	genic	exonic	nested	Vegfb	GeneID:89811,Genbank:XM_006230910.3,RGD:619799	vascular endothelial growth factor B, transcript variant X1	GO:0005615,GO:0005622,GO:0006493,GO:0007507,GO:0008083,GO:0008201,GO:0010469,GO:0045766,GO:0010629,GO:0046982,GO:0016020,GO:0048010,GO:0030949,GO:0050731,GO:0050918,GO:0050930,GO:0051781,GO:0051897,GO:0060048,GO:0001525,GO:0001666,GO:0001938,GO:0003674,GO:0005575,GO:0005576,GO:0035470,GO:0042056,GO:0042493,GO:0042803,GO:0043066,GO:0043117,GO:0043183,GO:0060754,GO:0043184,GO:0060976,GO:0043524,GO:…	extracellular space|intracellular|protein O-linked glycosylation|heart development|growth factor activity|heparin binding|regulation of signaling receptor activity|positive regulation of angiogenesis|negative regulation of gene expression|protein heterodimerization activity|membrane|vascular endothelial growth factor receptor signaling pathway|positive regulation of vascular endothelial growth fa…	rno04014,rno04015,rno04010,rno04151,rno04060,rno04510,rno04926,rno05200,rno04933	Ras signaling pathway|Rap1 signaling pathway|MAPK signaling pathway|PI3K-Akt signaling pathway|Cytokine-cytokine receptor interaction|Focal adhesion|Relaxin signaling pathway|Pathways in cancer|AGE-RAGE signaling pathway in diabetic complications
NONRATT003581.2	4.7051	2.23423	0.00772433	Up	Chr1	227093976	227108467	-	XM_017590480.1	22492	sense	intergenic	upstream	same_strand	Ms4a18	GeneID:100359485,Genbank:XM_017590480.1,RGD:2323808	membrane spanning 4-domains A18	GO:0016021	integral component of membrane
NONRATT003606.2	2.3174	1.21251	0.0124587	Up	Chr1	229205583	229205976	-	XM_008760280.2	0	sense	genic	exonic	nested	RGD1305704	GeneID:307452,Genbank:XM_008760280.2,RGD:1305704	similar to c-Mpl binding protein, transcript variant X1
NONRATT003609.2	0.364022	-1.4579	0.0121613	Down	Chr1	229638964	229639205	-	NM_001169120.1	0	sense	genic	exonic	overlapping	Zfp91	GeneID:246282,Genbank:NM_001169120.1,RGD:628736	zinc finger protein 91	GO:0005634,GO:0005730,GO:0007250,GO:0070534,GO:0003676,GO:0004842,GO:0005622	nucleus|nucleolus|activation of NF-kappaB-inducing kinase activity|protein K63-linked ubiquitination|nucleic acid binding|ubiquitin-protein transferase activity|intracellular
NONRATT003687.2	0.0869411	-3.52382	0.00788335	Down	Chr1	245853326	245855267	-	XM_006231235.3	0	sense	genic	exonic	overlapping	Rfx3	GeneID:361746,Genbank:XM_006231235.3,RGD:1307779	regulatory factor X3, transcript variant X4	GO:0048469,GO:0003700,GO:0050796,GO:0060271,GO:0005634,GO:0006351,GO:0006355,GO:0006357,GO:0007368,GO:0031018,GO:0060285,GO:0043565,GO:0060287,GO:0044212,GO:0072560,GO:0045892,GO:0000790,GO:2000078,GO:0045893,GO:0000978,GO:0045944,GO:0003309	cell maturation|DNA binding transcription factor activity|regulation of insulin secretion|cilium assembly|nucleus|transcription, DNA-templated|regulation of transcription, DNA-templated|regulation of transcription by RNA polymerase II|determination of left/right symmetry|endocrine pancreas development|cilium-dependent cell motility|sequence-specific DNA binding|epithelial cilium movement involved…
NONRATT003720.2	36.8598	5.20398	0.00324359	Up	Chr1	252816535	252818575	-	XM_017588801.1	0	sense	genic	exonic	nested	Lipa	GeneID:25055,Genbank:XM_017588801.1,RGD:3008	lipase A, lysosomal acid type, transcript variant X2	GO:0048873,GO:0016125,GO:0001650,GO:0016298,GO:0001816,GO:0004771,GO:0005764,GO:0030324,GO:0006631,GO:0006954,GO:0043231,GO:0048771,GO:0008283,GO:0000902,GO:0016042	homeostasis of number of cells within a tissue|sterol metabolic process|fibrillar center|lipase activity|cytokine production|sterol esterase activity|lysosome|lung development|fatty acid metabolic process|inflammatory response|intracellular membrane-bounded organelle|tissue remodeling|cell proliferation|cell morphogenesis|lipid catabolic process	rno00100,rno04142,rno04979	Steroid biosynthesis|Lysosome|Cholesterol metabolism
NONRATT003748.2	2.26767	1.18121	0.0296971	Up	Chr1	258174007	258174526	-	NM_001271354.1	34832	antisense	intergenic	downstream	convergent	Cyp2c24	GeneID:499353,Genbank:NM_001271354.1,RGD:1563697	cytochrome P450, family 2, subfamily c, polypeptide 24	GO:0071614,GO:0006805,GO:0008392,GO:0008395,GO:0016712,GO:0019369,GO:0020037,GO:0042738,GO:0043231,GO:0043651,GO:0005506,GO:0055114,GO:0005737,GO:0006082	linoleic acid epoxygenase activity|xenobiotic metabolic process|arachidonic acid epoxygenase activity|steroid hydroxylase activity|oxidoreductase activity, acting on paired donors, with incorporation or reduction of molecular oxygen, reduced flavin or flavoprotein as one donor, and incorporation of one atom of oxygen|arachidonic acid metabolic process|heme binding|exogenous drug catabolic process…	rno00140,rno00590,rno00591,rno00830,rno04726,rno04750,rno05204	Steroid hormone biosynthesis|Arachidonic acid metabolism|Linoleic acid metabolism|Retinol metabolism|Serotonergic synapse|Inflammatory mediator regulation of TRP channels|Chemical carcinogenesis
NONRATT003750.2	0.460474	-1.11881	0.0430604	Down	Chr1	259376507	259382449	-	XM_017590355.1	0	sense	genic	exonic	nested	Sorbs1	GeneID:686098,Genbank:XM_017590355.1,RGD:1586598	sorbin and SH3 domain containing 1, transcript variant X2	GO:0005829,GO:0005856,GO:0005886,GO:0005899,GO:0005913,GO:0019901,GO:0031625,GO:0005924,GO:0031667,GO:0032868,GO:0032869,GO:0033993,GO:0042594,GO:0043149,GO:0045121,GO:0001725,GO:0005070,GO:0005158,GO:0005634,GO:0005813,GO:0005925,GO:0007015,GO:0008134,GO:0008286,GO:0009967,GO:0014823,GO:0045725,GO:0016020,GO:0046326,GO:0016363,GO:0046889,GO:0048041,GO:1903078,GO:1904608,GO:2001275	cytosol|cytoskeleton|plasma membrane|insulin receptor complex|cell-cell adherens junction|protein kinase binding|ubiquitin protein ligase binding|cell-substrate adherens junction|response to nutrient levels|response to insulin|cellular response to insulin stimulus|response to lipid|response to starvation|stress fiber assembly|membrane raft|stress fiber|SH3/SH2 adaptor activity|insulin receptor bi…	rno04520,rno04910,rno03320	Adherens junction|Insulin signaling pathway|PPAR signaling pathway
NONRATT004040.2	Inf	Inf	0.0245557	Up	Chr10	733998	750414	+	NM_001108261.1	0	sense	genic	exonic	nested	Fopnl	GeneID:360461,Genbank:NM_001108261.1,RGD:1305823	FGFR1OP N-terminal like	GO:0031514,GO:0034451,GO:0034453,GO:0036064,GO:0060271,GO:0005634,GO:0005813	motile cilium|centriolar satellite|microtubule anchoring|ciliary basal body|cilium assembly|nucleus|centrosome
NONRATT004144.2	37.3347	5.22244	0.0161178	Up	Chr10	17391588	17392432	+	XM_017597618.1	0	sense	genic	exonic	overlapping	Ubtd2	GeneID:287178,Genbank:XM_017597618.1,RGD:1305506	ubiquitin domain containing 2, transcript variant X2	GO:0043130	ubiquitin binding
NONRATT004175.2	0.0635706	-3.9755	0.00196464	Down	Chr10	28191697	28193072	+	XM_006246127.2	0	sense	genic	exonic	nested	Gabrb2	GeneID:25451,Genbank:XM_006246127.2,RGD:2650	gamma-aminobutyric acid type A receptor beta 2 subunit, transcript variant X1	GO:0005886,GO:0005887,GO:0007165,GO:0007214,GO:0007268,GO:0007605,GO:0050877,GO:0016020,GO:0051932,GO:0016917,GO:0060119,GO:0030054,GO:0060384,GO:0071420,GO:0090102,GO:1901215,GO:1902476,GO:1902710,GO:1902711,GO:0004890,GO:0005230,GO:0005237,GO:0005254,GO:0005515,GO:0005829,GO:0030659,GO:0034220,GO:0034707,GO:0042391,GO:0043005,GO:0043523,GO:0043524,GO:0045202,GO:0045211,GO:0048666	plasma membrane|integral component of plasma membrane|signal transduction|gamma-aminobutyric acid signaling pathway|chemical synaptic transmission|sensory perception of sound|nervous system process|membrane|synaptic transmission, GABAergic|GABA receptor activity|inner ear receptor cell development|cell junction|innervation|cellular response to histamine|cochlea development|negative regulation of …	rno04080,rno04727,rno04726,rno04723,rno05032,rno05033	Neuroactive ligand-receptor interaction|GABAergic synapse|Serotonergic synapse|Retrograde endocannabinoid signaling|Morphine addiction|Nicotine addiction
NONRATT004179.2	5.11396	2.35444	0.00166056	Up	Chr10	29320193	29321479	+	XM_017597248.1	0	sense	genic	exonic	nested	Pwwp2a	GeneID:303060,Genbank:XM_017597248.1,RGD:1305891	PWWP domain containing 2A, transcript variant X2	GO:0003682,GO:0005634,GO:0042393	chromatin binding|nucleus|histone binding
NONRATT004246.2	2.35738	1.23719	0.00886667	Up	Chr10	37594594	37605642	+	NM_001007608.2	0	sense	genic	exonic	nested	Skp1	GeneID:287280,Genbank:NM_001007608.2,RGD:1359648	S-phase kinase-associated protein 1	GO:0097602,GO:0031146,GO:0005737,GO:0005813,GO:0031467,GO:0005829,GO:0008013,GO:0016567,GO:0019005,GO:0031519,GO:0035518,GO:0004842,GO:0051457,GO:0019904,GO:0005515,GO:0061630,GO:0005634	cullin family protein binding|SCF-dependent proteasomal ubiquitin-dependent protein catabolic process|cytoplasm|centrosome|Cul7-RING ubiquitin ligase complex|cytosol|beta-catenin binding|protein ubiquitination|SCF ubiquitin ligase complex|PcG protein complex|histone H2A monoubiquitination|ubiquitin-protein transferase activity|maintenance of protein location in nucleus|protein domain specific bin…	rno04141,rno04120,rno04310,rno04350,rno04110,rno04114,rno04710,rno05200,rno05168	Protein processing in endoplasmic reticulum|Ubiquitin mediated proteolysis|Wnt signaling pathway|TGF-beta signaling pathway|Cell cycle|Oocyte meiosis|Circadian rhythm|Pathways in cancer|Herpes simplex infection
NONRATT004265.2	4.91374	2.29682	0.00113964	Up	Chr10	39109521	39110816	+	NM_012591.1	0	sense	genic	exonic	overlapping	Irf1	GeneID:24508,Genbank:NM_012591.1,RGD:2920	interferon regulatory factor 1	GO:0003700,GO:0005515,GO:0005634,GO:0005737,GO:0010942,GO:0006355,GO:0032481,GO:0006366,GO:0006915,GO:0032728,GO:0034124,GO:0045590,GO:0045892,GO:0035458,GO:0045893,GO:0000790,GO:0071347,GO:0045944,GO:0071356,GO:0000978,GO:0071359,GO:0071375,GO:0001077,GO:2000564,GO:0003677,GO:0007050,GO:0007249,GO:0007565,GO:0008285,GO:0042127,GO:0009408,GO:0042532,GO:0010468,GO:0043374,GO:0043565,GO:0051607,GO:…	DNA binding transcription factor activity|protein binding|nucleus|cytoplasm|positive regulation of cell death|regulation of transcription, DNA-templated|positive regulation of type I interferon production|transcription by RNA polymerase II|apoptotic process|positive regulation of interferon-beta production|regulation of MyD88-dependent toll-like receptor signaling pathway|negative regulation of r…	rno04625,rno04917,rno05133,rno05160,rno05165	C-type lectin receptor signaling pathway|Prolactin signaling pathway|Pertussis|Hepatitis C|Human papillomavirus infection
NONRATT004284.2	0.29593	-1.75667	0.0374545	Down	Chr10	40574555	40576326	+	XM_008767659.1	1252	sense	intergenic	downstream	same_strand	Slc36a1	GeneID:155205,Genbank:XM_008767659.1,RGD:619801	solute carrier family 36 member 1, transcript variant X1	GO:0015824,GO:0015187,GO:0005302,GO:0016021,GO:0005764,GO:0035524,GO:0015193,GO:0005774,GO:0005783,GO:0005886,GO:0015078,GO:1902600,GO:0015804,GO:0015171,GO:0015808,GO:0015175,GO:0003333,GO:0015816,GO:0015180,GO:0005280	proline transport|glycine transmembrane transporter activity|L-tyrosine transmembrane transporter activity|integral component of membrane|lysosome|proline transmembrane transport|L-proline transmembrane transporter activity|vacuolar membrane|endoplasmic reticulum|plasma membrane|proton transmembrane transporter activity|proton transmembrane transport|neutral amino acid transport|amino acid transm…	rno04974	Protein digestion and absorption
NONRATT004312.2	6.53599	2.7084	7.0881e-07	Up	Chr10	43511327	43511557	+	XM_017597634.1	0	antisense	genic	intronic	nested	Faxdc2	GeneID:691221,Genbank:XM_017597634.1,RGD:1586284	fatty acid hydroxylase domain containing 2	GO:0016020,GO:0016126,GO:0016491,GO:0000254,GO:0005789,GO:0006629	membrane|sterol biosynthetic process|oxidoreductase activity|C-4 methylsterol oxidase activity|endoplasmic reticulum membrane|lipid metabolic process
NONRATT004368.2	Inf	Inf	0.00177156	Up	Chr10	47983254	47984472	+	XM_002727718.5	0	sense	genic	exonic	overlapping	Fam83g	GeneID:100360307,Genbank:XM_002727718.5,RGD:2322345	family with sequence similarity 83, member G	GO:0005634,GO:0005829,GO:0030509	nucleus|cytosol|BMP signaling pathway
NONRATT004379.2	2.13209	1.09227	0.0141458	Up	Chr10	48928410	48929449	+	XM_008767891.2	70	antisense	intergenic	downstream	convergent	Lrrc75a	GeneID:691777,Genbank:XM_008767891.2,RGD:1595947	leucine rich repeat containing 75A, transcript variant X1
NONRATT004383.2	0.266402	-1.90832	0.00113075	Down	Chr10	49307129	49310400	+	NM_001107568.3	0	sense	genic	exonic	nested	Tvp23b	GeneID:687358,Genbank:NM_001107568.3,RGD:1586539	trans-golgi network vesicle protein 23 homolog B (S. cerevisiae)	GO:0009306,GO:0016192,GO:0030173	protein secretion|vesicle-mediated transport|integral component of Golgi membrane
NONRATT004455.2	0	-Inf	2.60318e-05	Down	Chr10	56385645	56388296	+	NM_001304352.1	0	sense	genic	exonic	nested	Zbtb4	GeneID:287441,Genbank:NM_001304352.1,RGD:1307184	zinc finger and BTB domain containing 4	GO:0016604,GO:0003674,GO:0019901,GO:0005575,GO:0042803,GO:0005634,GO:0005654,GO:0005694,GO:0005829,GO:0043565,GO:0006351,GO:0045892,GO:0006974,GO:0046872,GO:0008150,GO:0008327,GO:0000122,GO:0010428,GO:0000977,GO:0001227	nuclear body|molecular_function|protein kinase binding|cellular_component|protein homodimerization activity|nucleus|nucleoplasm|chromosome|cytosol|sequence-specific DNA binding|transcription, DNA-templated|negative regulation of transcription, DNA-templated|cellular response to DNA damage stimulus|metal ion binding|biological_process|methyl-CpG binding|negative regulation of transcription by RNA …
NONRATT004538.2	12.3284	3.62391	0.0311721	Up	Chr10	59603420	59608180	+	XM_006246799.3	0	sense	genic	exonic	nested	Camkk1	GeneID:60341,Genbank:XM_006246799.3,RGD:62023	calcium/calmodulin-dependent protein kinase kinase 1, transcript variant X2	GO:0045860,GO:0004683,GO:0005515,GO:0005516,GO:0005524,GO:0005634,GO:0005737,GO:0006468,GO:0018105,GO:0018107,GO:0004672,GO:0032147,GO:0035556	positive regulation of protein kinase activity|calmodulin-dependent protein kinase activity|protein binding|calmodulin binding|ATP binding|nucleus|cytoplasm|protein phosphorylation|peptidyl-serine phosphorylation|peptidyl-threonine phosphorylation|protein kinase activity|activation of protein kinase activity|intracellular signal transduction	rno05034	Alcoholism
NONRATT004547.2	Inf	Inf	0.0114448	Up	Chr10	61652795	61653469	+	XM_008767959.2	30307	sense	intergenic	upstream	same_strand	Mnt	GeneID:287521,Genbank:XM_008767959.2,RGD:1308683	MAX network transcriptional repressor, transcript variant X1	GO:0003677,GO:0003682,GO:0003700,GO:0005634,GO:0005654,GO:0006355,GO:0007569,GO:0046983,GO:0051726,GO:2001234,GO:0000122,GO:0000977,GO:0001227	DNA binding|chromatin binding|DNA binding transcription factor activity|nucleus|nucleoplasm|regulation of transcription, DNA-templated|cell aging|protein dimerization activity|regulation of cell cycle|negative regulation of apoptotic signaling pathway|negative regulation of transcription by RNA polymerase II|RNA polymerase II regulatory region sequence-specific DNA binding|transcriptional repress…
NONRATT004555.2	4.0117	2.00421	0.00614449	Up	Chr10	62015103	62015891	+	NM_001109036.1	1456	antisense	intergenic	downstream	convergent	Ovca2	GeneID:497954,Genbank:NM_001109036.1,RGD:1564623	ovarian tumor suppressor candidate 2	GO:0005737,GO:0008150,GO:0032526,GO:0003674,GO:0005575,GO:0005634	cytoplasm|biological_process|response to retinoic acid|molecular_function|cellular_component|nucleus
NONRATT004557.2	3.23109	1.69202	0.00657378	Up	Chr10	62016214	62016703	+	NM_001109036.1	644	antisense	intergenic	downstream	convergent	Ovca2	GeneID:497954,Genbank:NM_001109036.1,RGD:1564623	ovarian tumor suppressor candidate 2	GO:0005737,GO:0008150,GO:0032526,GO:0003674,GO:0005575,GO:0005634	cytoplasm|biological_process|response to retinoic acid|molecular_function|cellular_component|nucleus
NONRATT004558.2	2.04059	1.02899	0.016136	Up	Chr10	62297513	62302054	+	XM_006246869.2	1070	sense	intergenic	upstream	same_strand	Tlcd2	GeneID:497955,Genbank:XM_006246869.2,RGD:1562631	TLC domain containing 2, transcript variant X2	GO:0016021	integral component of membrane
NONRATT004578.2	Inf	Inf	0.000923497	Up	Chr10	63441164	63442293	+	XM_008768132.2	0	sense	genic	exonic	overlapping	Gosr1	GeneID:94189,Genbank:XM_008768132.2,RGD:71093	golgi SNAP receptor complex member 1, transcript variant X2	GO:0006906,GO:0005484,GO:0015031,GO:0016021,GO:0005515,GO:0005794,GO:0005797,GO:0005801,GO:0031201,GO:0042147,GO:0048209,GO:0005829,GO:0006888,GO:0000139,GO:0006891,GO:0000149	vesicle fusion|SNAP receptor activity|protein transport|integral component of membrane|protein binding|Golgi apparatus|Golgi medial cisterna|cis-Golgi network|SNARE complex|retrograde transport, endosome to Golgi|regulation of vesicle targeting, to, from or within Golgi|cytosol|ER to Golgi vesicle-mediated transport|Golgi membrane|intra-Golgi vesicle-mediated transport|SNARE binding	rno04130	SNARE interactions in vesicular transport
NONRATT004591.2	3.14384	1.65253	0.0453132	Up	Chr10	64193914	64194716	-	NM_001007611.1	1387	sense	intergenic	downstream	same_strand	Fam101b	GeneID:287534,Genbank:NM_001007611.1,RGD:1359691	family with sequence similarity 101, member B	GO:0030036,GO:0031005,GO:0032432,GO:0048705,GO:0061182,GO:0061572,GO:1900158,GO:0001837,GO:0005737,GO:0015629	actin cytoskeleton organization|filamin binding|actin filament bundle|skeletal system morphogenesis|negative regulation of chondrocyte development|actin filament bundle organization|negative regulation of bone mineralization involved in bone maturation|epithelial to mesenchymal transition|cytoplasm|actin cytoskeleton
NONRATT004732.2	9.13504	3.19141	9.18419e-06	Up	Chr10	73902836	73920810	-	XM_006247078.3	0	sense	genic	exonic	nested	Vmp1	GeneID:192129,Genbank:XM_006247078.3,RGD:70367	vacuole membrane protein 1, transcript variant X1	GO:0012505,GO:0005515,GO:0016020,GO:0005730,GO:0016021,GO:0005783,GO:0005886,GO:0016236,GO:0006887,GO:0033116,GO:0006914,GO:0034329,GO:0007029,GO:0000407,GO:0098609,GO:0007030,GO:0007566,GO:0000421	endomembrane system|protein binding|membrane|nucleolus|integral component of membrane|endoplasmic reticulum|plasma membrane|macroautophagy|exocytosis|endoplasmic reticulum-Golgi intermediate compartment membrane|autophagy|cell junction assembly|endoplasmic reticulum organization|phagophore assembly site|cell-cell adhesion|Golgi organization|embryo implantation|autophagosome membrane	rno04140	Autophagy - animal
NONRATT004734.2	7.60433	2.92682	1.00969e-08	Up	Chr10	73903211	73905142	-	XM_006247078.3	0	sense	genic	exonic	nested	Vmp1	GeneID:192129,Genbank:XM_006247078.3,RGD:70367	vacuole membrane protein 1, transcript variant X1	GO:0012505,GO:0005515,GO:0016020,GO:0005730,GO:0016021,GO:0005783,GO:0005886,GO:0016236,GO:0006887,GO:0033116,GO:0006914,GO:0034329,GO:0007029,GO:0000407,GO:0098609,GO:0007030,GO:0007566,GO:0000421	endomembrane system|protein binding|membrane|nucleolus|integral component of membrane|endoplasmic reticulum|plasma membrane|macroautophagy|exocytosis|endoplasmic reticulum-Golgi intermediate compartment membrane|autophagy|cell junction assembly|endoplasmic reticulum organization|phagophore assembly site|cell-cell adhesion|Golgi organization|embryo implantation|autophagosome membrane	rno04140	Autophagy - animal
NONRATT004783.2	4.2165	2.07604	0.00780581	Up	Chr10	83231388	83293668	+	XM_008767968.1	0	sense	genic	exonic	nested	Spop	GeneID:287643,Genbank:XM_008767968.1,RGD:1311613	speckle type BTB/POZ protein, transcript variant X1	GO:1902237,GO:0005634,GO:2000676,GO:0005737,GO:0006511,GO:0016607,GO:0019005,GO:0030162,GO:0031463,GO:0031625,GO:0042593,GO:0043161,GO:0000122,GO:0001085,GO:0043433	positive regulation of endoplasmic reticulum stress-induced intrinsic apoptotic signaling pathway|nucleus|positive regulation of type B pancreatic cell apoptotic process|cytoplasm|ubiquitin-dependent protein catabolic process|nuclear speck|SCF ubiquitin ligase complex|regulation of proteolysis|Cul3-RING ubiquitin ligase complex|ubiquitin protein ligase binding|glucose homeostasis|proteasome-media…	rno04340	Hedgehog signaling pathway
NONRATT004788.2	0.385358	-1.37573	0.0222044	Down	Chr10	83578106	83579920	+	XM_008768188.1	4709	antisense	intergenic	downstream	convergent	LOC102547047	GeneID:102547047,Genbank:XM_008768188.1,RGD:7503123	uncharacterized LOC102547047, transcript variant X3
NONRATT004835.2	3.86783	1.95152	0.000697774	Up	Chr10	86168083	86168351	+	NM_138916.2	0	sense	genic	intronic	nested	Cdk12	GeneID:192350,Genbank:NM_138916.2,RGD:621111	cyclin-dependent kinase 12, transcript variant 2	GO:0005694,GO:0006368,GO:0006397,GO:0006468,GO:0008024,GO:0008134,GO:0043405,GO:0008353,GO:0043484,GO:0044212,GO:0045944,GO:0046777,GO:0051726,GO:0070816,GO:2000737,GO:0001650,GO:0002944,GO:0004672,GO:0004693,GO:0005524,GO:0005634,GO:0008380,GO:0016607,GO:0019901,GO:0019908,GO:0030332	chromosome|transcription elongation from RNA polymerase II promoter|mRNA processing|protein phosphorylation|cyclin/CDK positive transcription elongation factor complex|transcription factor binding|regulation of MAP kinase activity|RNA polymerase II carboxy-terminal domain kinase activity|regulation of RNA splicing|transcription regulatory region DNA binding|positive regulation of transcription by…
NONRATT004918.2	Inf	Inf	0.0166873	Up	Chr10	89476806	89477199	+	XM_006247322.3	0	sense	genic	exonic	nested	Nbr1	GeneID:303554,Genbank:XM_006247322.3,RGD:69195	NBR1, autophagy cargo receptor, transcript variant X1	GO:0005770,GO:0005776,GO:0005829,GO:0043130,GO:0008270,GO:0016236,GO:0043231,GO:0045668,GO:0051019,GO:0051259,GO:0000407,GO:0005654,GO:0005739,GO:0005764,GO:0016604,GO:0030500,GO:0031430,GO:0032872	late endosome|autophagosome|cytosol|ubiquitin binding|zinc ion binding|macroautophagy|intracellular membrane-bounded organelle|negative regulation of osteoblast differentiation|mitogen-activated protein kinase binding|protein complex oligomerization|phagophore assembly site|nucleoplasm|mitochondrion|lysosome|nuclear body|regulation of bone mineralization|M band|regulation of stress-activated MAPK…	rno04137	Mitophagy - animal
NONRATT004940.2	0.0217522	-5.5227	0.0380105	Down	Chr10	90670013	90670940	+	XM_017597401.1	11773	antisense	intergenic	upstream	divergent	Ccdc43	GeneID:360637,Genbank:XM_017597401.1,RGD:1311929	coiled-coil domain containing 43, transcript variant X1	GO:0005829	cytosol
NONRATT004979.2	0.251004	-1.99422	4.1795e-05	Down	Chr10	94129771	94132418	+	XM_008768351.2	0	sense	genic	exonic	nested	Tanc2	GeneID:303599,Genbank:XM_008768351.2,RGD:1309285	tetratricopeptide repeat, ankyrin repeat and coiled-coil containing 2, transcript variant X1	GO:0001701	in utero embryonic development
NONRATT005081.2	0.327624	-1.60989	0.000995522	Down	Chr10	103831798	103832851	-	NM_001107064.1	0	sense	genic	exonic	overlapping	Fads6	GeneID:303671,Genbank:NM_001107064.1,RGD:1311950	fatty acid desaturase 6	GO:0006629,GO:0016021	lipid metabolic process|integral component of membrane
NONRATT005092.2	2.21571	1.14777	0.0167547	Up	Chr10	105645750	105649943	+	NM_001031652.1	923	antisense	intergenic	downstream	convergent	St6galnac2	GeneID:303692,Genbank:NM_001031652.1,RGD:1560747	ST6 N-acetylgalactosaminide alpha-2,6-sialyltransferase 2	GO:0006486,GO:0006493,GO:0008373,GO:0009311,GO:0016021,GO:0018279,GO:0097503,GO:1990743,GO:0000139,GO:0001665	protein glycosylation|protein O-linked glycosylation|sialyltransferase activity|oligosaccharide metabolic process|integral component of membrane|protein N-linked glycosylation via asparagine|sialylation|protein sialylation|Golgi membrane|alpha-N-acetylgalactosaminide alpha-2,6-sialyltransferase activity
NONRATT005166.2	5.00062	2.32211	0.00233368	Up	Chr10	1740701	1741172	-	XM_017597786.1	0	sense	genic	exonic	nested	LOC688708	GeneID:688708,Genbank:XM_017597786.1,RGD:1585299	similar to ATP-binding cassette, sub-family C (CFTR/MRP), member 1
NONRATT005190.2	6.91811	2.79038	0.0388757	Up	Chr10	7056135	7071555	-	NM_001106973.1	0	sense	genic	exonic	overlapping	Pmm2	GeneID:302915,Genbank:NM_001106973.1,RGD:1309366	phosphomannomutase 2	GO:0005634,GO:0005737,GO:0005829,GO:0006013,GO:0006487,GO:0008150,GO:0009298,GO:0043025,GO:0045047,GO:0003674,GO:0004615,GO:0005575	nucleus|cytoplasm|cytosol|mannose metabolic process|protein N-linked glycosylation|biological_process|GDP-mannose biosynthetic process|neuronal cell body|protein targeting to ER|molecular_function|phosphomannomutase activity|cellular_component	rno00051,rno00520	Fructose and mannose metabolism|Amino sugar and nucleotide sugar metabolism
NONRATT005218.2	0.409465	-1.28819	0.0106117	Down	Chr10	11881149	11884363	-	XM_017597418.1	0	sense	genic	exonic	overlapping	Naa60	GeneID:363545,Genbank:XM_017597418.1,RGD:1308915	N(alpha)-acetyltransferase 60, NatF catalytic subunit, transcript variant X2	GO:0043967,GO:0008283,GO:0004402,GO:0010485,GO:0004596,GO:0005575,GO:0006334,GO:0017196,GO:0006474,GO:0007059,GO:0000139,GO:0042803	histone H4 acetylation|cell proliferation|histone acetyltransferase activity|H4 histone acetyltransferase activity|peptide alpha-N-acetyltransferase activity|cellular_component|nucleosome assembly|N-terminal peptidyl-methionine acetylation|N-terminal protein amino acid acetylation|chromosome segregation|Golgi membrane|protein homodimerization activity
NONRATT005307.2	0	-Inf	1.17136e-05	Down	Chr10	15349877	15373659	-	XM_220262.7	0	sense	genic	exonic	nested	Rab11fip3	GeneID:303002,Genbank:XM_220262.7,RGD:1308952	RAB11 family interacting protein 3 (class II), transcript variant X1	GO:0061512,GO:0005815,GO:0070164,GO:0016020,GO:0017137,GO:0030306,GO:0030496,GO:0032154,GO:0032456,GO:0032465,GO:0042803,GO:0043231,GO:0045171,GO:0005654,GO:0051959,GO:0005768,GO:0055037,GO:0005813	protein localization to cilium|microtubule organizing center|negative regulation of adiponectin secretion|membrane|Rab GTPase binding|ADP-ribosylation factor binding|midbody|cleavage furrow|endocytic recycling|regulation of cytokinesis|protein homodimerization activity|intracellular membrane-bounded organelle|intercellular bridge|nucleoplasm|dynein light intermediate chain binding|endosome|recycl…	rno04144	Endocytosis
NONRATT005309.2	2.30974	1.20773	0.0285386	Up	Chr10	15417622	15431869	-	XM_220262.7	0	sense	genic	exonic	nested	Rab11fip3	GeneID:303002,Genbank:XM_220262.7,RGD:1308952	RAB11 family interacting protein 3 (class II), transcript variant X1	GO:0061512,GO:0005815,GO:0070164,GO:0016020,GO:0017137,GO:0030306,GO:0030496,GO:0032154,GO:0032456,GO:0032465,GO:0042803,GO:0043231,GO:0045171,GO:0005654,GO:0051959,GO:0005768,GO:0055037,GO:0005813	protein localization to cilium|microtubule organizing center|negative regulation of adiponectin secretion|membrane|Rab GTPase binding|ADP-ribosylation factor binding|midbody|cleavage furrow|endocytic recycling|regulation of cytokinesis|protein homodimerization activity|intracellular membrane-bounded organelle|intercellular bridge|nucleoplasm|dynein light intermediate chain binding|endosome|recycl…	rno04144	Endocytosis
NONRATT005329.2	2.08247	1.0583	0.04095	Up	Chr10	16770174	16792868	-	NM_053578.3	0	sense	genic	exonic	nested	Atp6v0e1	GeneID:94170,Genbank:NM_053578.3,RGD:621393	ATPase H+ transporting V0 subunit e1	GO:0016020,GO:0016021,GO:0033179,GO:0043200,GO:0046961,GO:0055085,GO:1902600,GO:0003674,GO:0005575,GO:0015991	membrane|integral component of membrane|proton-transporting V-type ATPase, V0 domain|response to amino acid|proton-transporting ATPase activity, rotational mechanism|transmembrane transport|proton transmembrane transport|molecular_function|cellular_component|ATP hydrolysis coupled proton transport	rno00190,rno04145,rno04966,rno04721,rno05323	Oxidative phosphorylation|Phagosome|Collecting duct acid secretion|Synaptic vesicle cycle|Rheumatoid arthritis
NONRATT005389.2	0	-Inf	0.0127212	Down	Chr10	35737593	35737885	-	XM_006246219.2	0	sense	genic	exonic	nested	Ltc4s	GeneID:114097,Genbank:XM_006246219.2,RGD:620677	leukotriene C4 synthase, transcript variant X2	GO:0071299,GO:0042493,GO:0008047,GO:0004464,GO:0098869,GO:0042802,GO:0008289,GO:0004602,GO:0043085,GO:0005635,GO:0005640,GO:0010035,GO:0005783,GO:0043231,GO:0016021,GO:0043295,GO:0019370,GO:0046982,GO:0005789,GO:0004364,GO:0048678,GO:0006691,GO:0071222,GO:0032496	cellular response to vitamin A|response to drug|enzyme activator activity|leukotriene-C4 synthase activity|cellular oxidant detoxification|identical protein binding|lipid binding|glutathione peroxidase activity|positive regulation of catalytic activity|nuclear envelope|nuclear outer membrane|response to inorganic substance|endoplasmic reticulum|intracellular membrane-bounded organelle|integral co…	rno00590	Arachidonic acid metabolism
NONRATT005390.2	0	-Inf	0.00142637	Down	Chr10	35737594	35739606	-	XM_008767655.2	0	sense	genic	exonic	nested	Ltc4s	GeneID:114097,Genbank:XM_008767655.2,RGD:620677	leukotriene C4 synthase, transcript variant X1	GO:0071299,GO:0042493,GO:0008047,GO:0004464,GO:0098869,GO:0042802,GO:0008289,GO:0004602,GO:0043085,GO:0005635,GO:0005640,GO:0010035,GO:0005783,GO:0043231,GO:0016021,GO:0043295,GO:0019370,GO:0046982,GO:0005789,GO:0004364,GO:0048678,GO:0006691,GO:0071222,GO:0032496	cellular response to vitamin A|response to drug|enzyme activator activity|leukotriene-C4 synthase activity|cellular oxidant detoxification|identical protein binding|lipid binding|glutathione peroxidase activity|positive regulation of catalytic activity|nuclear envelope|nuclear outer membrane|response to inorganic substance|endoplasmic reticulum|intracellular membrane-bounded organelle|integral co…	rno00590	Arachidonic acid metabolism
NONRATT005410.2	0.407985	-1.29341	0.0173448	Down	Chr10	37266782	37267377	-	XM_006246260.3	1755	sense	intergenic	downstream	same_strand	Jade2	GeneID:303113,Genbank:XM_006246260.3,RGD:1309152	jade family PHD finger 2, transcript variant X4	GO:0043966,GO:0043981,GO:0043982,GO:0043983,GO:0043984,GO:0046872,GO:0050767,GO:0050769,GO:0051865,GO:0060395,GO:0061630,GO:0000123,GO:1990138,GO:0000209,GO:0005654	histone H3 acetylation|histone H4-K5 acetylation|histone H4-K8 acetylation|histone H4-K12 acetylation|histone H4-K16 acetylation|metal ion binding|regulation of neurogenesis|positive regulation of neurogenesis|protein autoubiquitination|SMAD protein signal transduction|ubiquitin protein ligase activity|histone acetyltransferase complex|neuron projection extension|protein polyubiquitination|nucleo…
NONRATT005498.2	0.152279	-2.71521	0.0257962	Down	Chr10	47434594	47434935	-	NM_001191644.1	0	sense	genic	exonic	nested	Usp22	GeneID:303201,Genbank:NM_001191644.1,RGD:1310354	ubiquitin specific peptidase 22	GO:0030374,GO:0004843,GO:0043967,GO:0045893,GO:0005575,GO:0006511,GO:0008150,GO:0008270,GO:0010485,GO:0045931,GO:0016574,GO:0070461,GO:0016578,GO:0016579,GO:0016607,GO:0000124,GO:0003674,GO:0019899,GO:0003713	ligand-dependent nuclear receptor transcription coactivator activity|thiol-dependent ubiquitin-specific protease activity|histone H4 acetylation|positive regulation of transcription, DNA-templated|cellular_component|ubiquitin-dependent protein catabolic process|biological_process|zinc ion binding|H4 histone acetyltransferase activity|positive regulation of mitotic cell cycle|histone ubiquitinatio…
NONRATT005632.2	19.2284	4.26516	0.0103542	Up	Chr10	57415528	57416194	-	XM_001080739.5	0	sense	genic	exonic	overlapping	Scimp	GeneID:691993,Genbank:XM_001080739.5,RGD:1593299	SLP adaptor and CSK interacting membrane protein, transcript variant X1	GO:0007127,GO:0016020,GO:0016021,GO:0031256,GO:0031259,GO:0070374,GO:0097197,GO:0001772	meiosis I|membrane|integral component of membrane|leading edge membrane|uropod membrane|positive regulation of ERK1 and ERK2 cascade|tetraspanin-enriched microdomain|immunological synapse
NONRATT005806.2	0.0580706	-4.10605	0.0492098	Down	Chr10	72393344	72417070	-	XM_017597308.1	0	sense	genic	exonic	nested	Usp32	GeneID:303394,Genbank:XM_017597308.1,RGD:1306657	ubiquitin specific peptidase 32, transcript variant X1	GO:0005829,GO:0006511,GO:0016579,GO:0004843,GO:0005509,GO:0005794	cytosol|ubiquitin-dependent protein catabolic process|protein deubiquitination|thiol-dependent ubiquitin-specific protease activity|calcium ion binding|Golgi apparatus
NONRATT005823.2	Inf	Inf	0.00696058	Up	Chr10	76353409	76355161	+	NM_001009536.1	0	sense	genic	exonic	nested	Trim25	GeneID:494338,Genbank:NM_001009536.1,RGD:1594396	tripartite motif-containing 25	GO:1902187,GO:0043627,GO:0005654,GO:1990830,GO:0005737,GO:0045087,GO:0005829,GO:0006511,GO:0006513,GO:0008270,GO:0045296,GO:0016604,GO:0046596,GO:0046597,GO:0030433,GO:0051091,GO:0033280,GO:0003674,GO:0051092,GO:0036503,GO:0004842,GO:1902186,GO:0043123,GO:0005575	negative regulation of viral release from host cell|response to estrogen|nucleoplasm|cellular response to leukemia inhibitory factor|cytoplasm|innate immune response|cytosol|ubiquitin-dependent protein catabolic process|protein monoubiquitination|zinc ion binding|cadherin binding|nuclear body|regulation of viral entry into host cell|negative regulation of viral entry into host cell|ubiquitin-depe…	rno04064,rno04622,rno05164	NF-kappa B signaling pathway|RIG-I-like receptor signaling pathway|Influenza A
NONRATT005866.2	0.192438	-2.37753	1.09843e-06	Down	Chr10	77838375	77839511	-	XM_006247136.2	0	sense	genic	exonic	nested	Hlf	GeneID:690286,Genbank:XM_006247136.2,RGD:1582828	HLF, PAR bZIP transcription factor, transcript variant X1	GO:0001228,GO:0005634,GO:0006366,GO:0007275,GO:0035914,GO:0043565,GO:0045944,GO:0000977,GO:0001077,GO:0048511	transcriptional activator activity, RNA polymerase II transcription regulatory region sequence-specific DNA binding|nucleus|transcription by RNA polymerase II|multicellular organism development|skeletal muscle cell differentiation|sequence-specific DNA binding|positive regulation of transcription by RNA polymerase II|RNA polymerase II regulatory region sequence-specific DNA binding|transcriptiona…
NONRATT005878.2	3.13315	1.64761	0.0194203	Up	Chr10	81663800	81664281	-	NM_138548.2	0	sense	genic	exonic	nested	Nme1	GeneID:191575,Genbank:NM_138548.2,RGD:70497	NME/NM23 nucleoside diphosphate kinase 1	GO:0005524,GO:0005525,GO:0005634,GO:0005741,GO:0005813,GO:0005829,GO:0019899,GO:0005882,GO:0019901,GO:0006165,GO:0021766,GO:0006183,GO:0030879,GO:0032587,GO:0033574,GO:0035690,GO:0042493,GO:0042802,GO:0042981,GO:0000287,GO:0000977,GO:0002762,GO:0003697,GO:0004536,GO:0004550,GO:0005515,GO:0006228,GO:0006241,GO:0006259,GO:0006897,GO:0007595,GO:0010629,GO:0010976,GO:0043015,GO:0014075,GO:0043024,GO:…	ATP binding|GTP binding|nucleus|mitochondrial outer membrane|centrosome|cytosol|enzyme binding|intermediate filament|protein kinase binding|nucleoside diphosphate phosphorylation|hippocampus development|GTP biosynthetic process|mammary gland development|ruffle membrane|response to testosterone|cellular response to drug|response to drug|identical protein binding|regulation of apoptotic process|mag…	rno00230,rno00240,rno00983	Purine metabolism|Pyrimidine metabolism|Drug metabolism - other enzymes
NONRATT005988.2	16.8211	4.0722	0.000328563	Up	Chr10	87056352	87057313	-	NM_199489.4	22	sense	intergenic	downstream	same_strand	Ccr7	GeneID:287673,Genbank:NM_199489.4,RGD:735151	C-C motif chemokine receptor 7	GO:2000522,GO:0045060,GO:0032496,GO:0002922,GO:2000525,GO:0048872,GO:0032649,GO:0005622,GO:2000526,GO:0050706,GO:0032735,GO:0005739,GO:0050862,GO:0005886,GO:0006935,GO:0006954,GO:0035757,GO:0006955,GO:0071345,GO:0035758,GO:0007186,GO:0072610,GO:0038115,GO:0009897,GO:0090023,GO:0038116,GO:0009986,GO:0002408,GO:0097029,GO:0038117,GO:0016021,GO:0002606,GO:2000510,GO:0038121,GO:0016493,GO:0002885	positive regulation of immunological synapse formation|negative thymic T cell selection|response to lipopolysaccharide|positive regulation of humoral immune response|positive regulation of T cell costimulation|homeostasis of number of cells|regulation of interferon-gamma production|intracellular|positive regulation of glycoprotein biosynthetic process involved in immunological synapse formation|r…	rno04060,rno04062	Cytokine-cytokine receptor interaction|Chemokine signaling pathway
NONRATT005995.2	0.32891	-1.60424	0.00186975	Down	Chr10	87238722	87239205	-	XM_017597318.1	64	sense	intergenic	upstream	same_strand	Krt25	GeneID:303519,Genbank:XM_017597318.1,RGD:1359097	keratin 25, transcript variant X1	GO:0007010,GO:0007568,GO:0031069,GO:0042633,GO:0045109,GO:0046982,GO:0005198,GO:0005737,GO:0005882	cytoskeleton organization|aging|hair follicle morphogenesis|hair cycle|intermediate filament organization|protein heterodimerization activity|structural molecule activity|cytoplasm|intermediate filament	rno04915	Estrogen signaling pathway
NONRATT006065.2	0.324408	-1.62412	0.0174636	Down	Chr10	89908227	89909636	-	NM_001173376.2	0	sense	genic	exonic	nested	Dusp3	GeneID:498003,Genbank:NM_001173376.2,RGD:1560049	dual specificity phosphatase 3	GO:0046329,GO:0016311,GO:0003674,GO:0016791,GO:0004721,GO:0050860,GO:0019901,GO:0004725,GO:0005575,GO:0005634,GO:0005654,GO:0033549,GO:0005737,GO:0050868,GO:0005829,GO:0035335,GO:0070373,GO:0043409,GO:0006470,GO:0000188,GO:0045931,GO:0008138,GO:0001701,GO:0001772	negative regulation of JNK cascade|dephosphorylation|molecular_function|phosphatase activity|phosphoprotein phosphatase activity|negative regulation of T cell receptor signaling pathway|protein kinase binding|protein tyrosine phosphatase activity|cellular_component|nucleus|nucleoplasm|MAP kinase phosphatase activity|cytoplasm|negative regulation of T cell activation|cytosol|peptidyl-tyrosine deph…	rno04010	MAPK signaling pathway
NONRATT006082.2	3.96512	1.98737	0.00408694	Up	Chr10	90260896	90263205	-	XM_008767952.2	0	sense	genic	exonic	overlapping	Ubtf	GeneID:25574,Genbank:XM_008767952.2,RGD:3927	upstream binding transcription factor, RNA polymerase I, transcript variant X4	GO:0006355,GO:0001188,GO:0006360,GO:0001650,GO:0006362,GO:0003682,GO:0005515,GO:0045943,GO:0005634,GO:0097110,GO:1902659,GO:0005730,GO:0000183,GO:1990830,GO:0001164,GO:0006338,GO:0001165	regulation of transcription, DNA-templated|RNA polymerase I transcriptional preinitiation complex assembly|transcription by RNA polymerase I|fibrillar center|transcription elongation from RNA polymerase I promoter|chromatin binding|protein binding|positive regulation of transcription by RNA polymerase I|nucleus|scaffold protein binding|regulation of glucose mediated signaling pathway|nucleolus|ch…
NONRATT006201.2	3.7689	1.91415	4.04045e-05	Up	Chr10	95951835	95952646	-	NM_080692.1	1514	sense	intergenic	downstream	same_strand	Cacng4	GeneID:140725,Genbank:NM_080692.1,RGD:628804	calcium voltage-gated channel auxiliary subunit gamma 4	GO:2000311,GO:0019226,GO:0032281,GO:0036477,GO:0051968,GO:0070588,GO:0098839,GO:0098943,GO:0098970,GO:0005245,GO:0099590,GO:0005891,GO:0016247	regulation of AMPA receptor activity|transmission of nerve impulse|AMPA glutamate receptor complex|somatodendritic compartment|positive regulation of synaptic transmission, glutamatergic|calcium ion transmembrane transport|postsynaptic density membrane|neurotransmitter receptor transport, postsynaptic endosome to lysosome|postsynaptic neurotransmitter receptor diffusion trapping|voltage-gated cal…	rno04010,rno04921,rno04260,rno04261,rno05410,rno05412,rno05414	MAPK signaling pathway|Oxytocin signaling pathway|Cardiac muscle contraction|Adrenergic signaling in cardiomyocytes|Hypertrophic cardiomyopathy (HCM)|Arrhythmogenic right ventricular cardiomyopathy (ARVC)|Dilated cardiomyopathy (DCM)
NONRATT006252.2	3.9206	1.97108	0.0241141	Up	Chr10	104955084	105052289	+	NM_001168285.1	0	sense	genic	exonic	overlapping	RGD1559482	GeneID:498022,Genbank:NM_001168285.1,RGD:1559482	similar to immunoglobulin superfamily, member 7	GO:0016021	integral component of membrane
NONRATT006253.2	7.20129	2.84826	0.028331	Up	Chr10	104998707	104999399	+	NM_001168284.1	0	sense	genic	intronic	nested	RGD1561778	GeneID:303666,Genbank:NM_001168284.1,RGD:1561778	similar to dendritic cell-derived immunoglobulin(Ig)-like receptor 1, DIgR1 - mouse	GO:0005886,GO:0050715	plasma membrane|positive regulation of cytokine secretion
NONRATT006276.2	5.00784	2.32419	0.0317075	Up	Chr10	103946885	103948314	+	XM_017597738.1	0	sense	genic	exonic	nested	Cdr2l	GeneID:360656,Genbank:XM_017597738.1,RGD:1306881	cerebellar degeneration-related protein 2-like, transcript variant X3
NONRATT006299.2	0	-Inf	0.00170704	Down	Chr10	105747315	105748244	-	XM_006247843.3	0	sense	genic	exonic	overlapping	Mxra7	GeneID:690599,Genbank:XM_006247843.3,RGD:1594666	matrix remodeling associated 7, transcript variant X3	GO:0016021,GO:0031012	integral component of membrane|extracellular matrix
NONRATT006315.2	Inf	Inf	1.43936e-32	Up	Chr10	106973848	106974402	-	XM_008768398.1	0	sense	genic	exonic	overlapping	Socs3	GeneID:89829,Genbank:XM_008768398.1,RGD:621087	suppressor of cytokine signaling 3, transcript variant X1	GO:0007165,GO:0007259,GO:0007568,GO:0009408,GO:0034097,GO:0009617,GO:0035556,GO:0009725,GO:0042493,GO:0009968,GO:0042532,GO:0043066,GO:0043434,GO:0060674,GO:0045595,GO:0045597,GO:0060707,GO:0060708,GO:1990830,GO:0001558,GO:0001666,GO:0001784,GO:0001932,GO:0004860,GO:0005622,GO:0005737,GO:0006469,GO:0010332,GO:0014070,GO:0016567,GO:0019221,GO:0031100,GO:0032094,GO:0032355,GO:0046426,GO:0032496,GO:…	signal transduction|JAK-STAT cascade|aging|response to heat|response to cytokine|response to bacterium|intracellular signal transduction|response to hormone|response to drug|negative regulation of signal transduction|negative regulation of tyrosine phosphorylation of STAT protein|negative regulation of apoptotic process|response to peptide hormone|placenta blood vessel development|regulation of c…	rno04120,rno04630,rno04668,rno04910,rno04920,rno04917,rno04380,rno04930,rno04932,rno04931,rno05164,rno05160,rno05168	Ubiquitin mediated proteolysis|Jak-STAT signaling pathway|TNF signaling pathway|Insulin signaling pathway|Adipocytokine signaling pathway|Prolactin signaling pathway|Osteoclast differentiation|Type II diabetes mellitus|Non-alcoholic fatty liver disease (NAFLD)|Insulin resistance|Influenza A|Hepatitis C|Herpes simplex infection
NONRATT006332.2	0.473608	-1.07823	0.0112372	Down	Chr10	108682338	108683723	-	NM_153735.2	0	sense	genic	exonic	overlapping	Nptx1	GeneID:266777,Genbank:NM_153735.2,RGD:628894	neuronal pentraxin 1	GO:0005886,GO:0006839,GO:0030133,GO:0035865,GO:0043005,GO:0043653,GO:0046872,GO:0060385,GO:0005737,GO:0071333,GO:0005739	plasma membrane|mitochondrial transport|transport vesicle|cellular response to potassium ion|neuron projection|mitochondrial fragmentation involved in apoptotic process|metal ion binding|axonogenesis involved in innervation|cytoplasm|cellular response to glucose stimulus|mitochondrion
NONRATT006334.2	0.0358239	-4.80293	0.0223378	Down	Chr10	108684210	108684875	-	NM_153735.2	0	sense	genic	exonic	nested	Nptx1	GeneID:266777,Genbank:NM_153735.2,RGD:628894	neuronal pentraxin 1	GO:0005886,GO:0006839,GO:0030133,GO:0035865,GO:0043005,GO:0043653,GO:0046872,GO:0060385,GO:0005737,GO:0071333,GO:0005739	plasma membrane|mitochondrial transport|transport vesicle|cellular response to potassium ion|neuron projection|mitochondrial fragmentation involved in apoptotic process|metal ion binding|axonogenesis involved in innervation|cytoplasm|cellular response to glucose stimulus|mitochondrion
NONRATT006389.2	0.220963	-2.17813	0.000735583	Down	Chr10	112502526	112503023	-	XM_017597767.1	0	sense	genic	exonic	nested	LOC103690393	GeneID:103690393,Genbank:XM_017597767.1,RGD:9375264	zinc finger protein 431-like, transcript variant X2
NONRATT006419.2	4.92661	2.30059	1.28036e-06	Up	Chr11	27608800	27611005	+	XM_017598088.1	0	sense	genic	exonic	nested	LOC103690154	GeneID:103690154,Genbank:XM_017598088.1,RGD:9077397	transcription regulator protein BACH1-like
NONRATT006441.2	3.2094	1.68231	0.0214718	Up	Chr11	31665687	31666852	+	XM_017597943.1	0	sense	genic	exonic	overlapping	Ifnar1	GeneID:288264,Genbank:XM_017597943.1,RGD:1305399	interferon alpha and beta receptor subunit 1, transcript variant X2	GO:0042110,GO:0004905,GO:0045351,GO:0004920,GO:0045893,GO:0005575,GO:0005886,GO:0005887,GO:0008150,GO:0016021,GO:0050718,GO:0019221,GO:0050730,GO:0019962,GO:0051607,GO:0032496,GO:0060337,GO:0032728,GO:0003674,GO:0060759,GO:0032729,GO:0004896,GO:0035457,GO:0004904	T cell activation|type I interferon receptor activity|type I interferon biosynthetic process|interleukin-10 receptor activity|positive regulation of transcription, DNA-templated|cellular_component|plasma membrane|integral component of plasma membrane|biological_process|integral component of membrane|positive regulation of interleukin-1 beta secretion|cytokine-mediated signaling pathway|regulation…	rno04630,rno04151,rno04060,rno04217,rno04620,rno04621,rno04650,rno04380,rno05200,rno05162,rno05164,rno05161,rno05160,rno05168,rno05167,rno05165	Jak-STAT signaling pathway|PI3K-Akt signaling pathway|Cytokine-cytokine receptor interaction|Necroptosis|Toll-like receptor signaling pathway|NOD-like receptor signaling pathway|Natural killer cell mediated cytotoxicity|Osteoclast differentiation|Pathways in cancer|Measles|Influenza A|Hepatitis B|Hepatitis C|Herpes simplex infection|Kaposi's sarcoma-associated herpesvirus infection|Human papillom…
NONRATT006550.2	Inf	Inf	0.00523532	Up
NONRATT006570.2	0.210904	-2.24534	0.0121829	Down	Chr11	54433157	54435058	+	XM_017598154.1	0	sense	genic	exonic	nested	Dzip3	GeneID:303963,Genbank:XM_017598154.1,RGD:1563278	DAZ interacting zinc finger protein 3, transcript variant X5	GO:0003723,GO:0004842,GO:0005737,GO:0019902,GO:0030433,GO:0030968,GO:0031593,GO:0036513,GO:0044322,GO:0051082,GO:1990381,GO:0000209,GO:0000836	RNA binding|ubiquitin-protein transferase activity|cytoplasm|phosphatase binding|ubiquitin-dependent ERAD pathway|endoplasmic reticulum unfolded protein response|polyubiquitin modification-dependent protein binding|Derlin-1 retrotranslocation complex|endoplasmic reticulum quality control compartment|unfolded protein binding|ubiquitin-specific protease binding|protein polyubiquitination|Hrd1p ubiq…
NONRATT006692.2	2.1336	1.09329	0.017536	Up	Chr11	77469035	77469763	-	XM_006248504.3	0	sense	genic	intronic	nested	Il1rap	GeneID:25466,Genbank:XM_006248504.3,RGD:2893	interleukin 1 receptor accessory protein, transcript variant X2	GO:1990782,GO:0051092,GO:0032736,GO:0004908,GO:2000778,GO:0051965,GO:0032754,GO:0005149,GO:0005615,GO:0005737,GO:0032991,GO:0016021,GO:0072602,GO:0038172,GO:0019221,GO:1900006,GO:0042094,GO:0019966,GO:0002114,GO:0030674,GO:0004871	protein tyrosine kinase binding|positive regulation of NF-kappaB transcription factor activity|positive regulation of interleukin-13 production|interleukin-1 receptor activity|positive regulation of interleukin-6 secretion|positive regulation of synapse assembly|positive regulation of interleukin-5 production|interleukin-1 receptor binding|extracellular space|cytoplasm|protein-containing complex|…	rno04010,rno04060,rno04659,rno04750	MAPK signaling pathway|Cytokine-cytokine receptor interaction|Th17 cell differentiation|Inflammatory mediator regulation of TRP channels
NONRATT006707.2	4.72562	2.2405	0.0124053	Up	Chr11	82384280	82385297	+	XM_006248536.3	0	sense	genic	exonic	nested	Tra2b	GeneID:117259,Genbank:XM_006248536.3,RGD:619886	transformer 2 beta homolog (Drosophila), transcript variant X1	GO:0048471,GO:0005681,GO:0000398,GO:0051259,GO:0019904,GO:0070717,GO:0021796,GO:0003723,GO:0071333,GO:0003729,GO:0005515,GO:0036002,GO:0005634,GO:1990403,GO:0042802,GO:0043484,GO:0048025,GO:0005637,GO:0000302,GO:0048026,GO:0005654,GO:0000381	perinuclear region of cytoplasm|spliceosomal complex|mRNA splicing, via spliceosome|protein complex oligomerization|protein domain specific binding|poly-purine tract binding|cerebral cortex regionalization|RNA binding|cellular response to glucose stimulus|mRNA binding|protein binding|pre-mRNA binding|nucleus|embryonic brain development|identical protein binding|regulation of RNA splicing|negative…	rno03040	Spliceosome
NONRATT006737.2	0.348226	-1.5219	0.0348489	Down	Chr11	86517116	86517624	+	NM_053931.4	0	sense	genic	exonic	nested	Sept5	GeneID:116728,Genbank:NM_053931.4,RGD:621763	septin 5	GO:0005886,GO:0005938,GO:0005940,GO:0008021,GO:0032160,GO:0032947,GO:0034613,GO:0015630,GO:0035091,GO:0042803,GO:0043005,GO:0043195,GO:0043679,GO:0000281,GO:0000921,GO:0001725,GO:0003924,GO:0005515,GO:0005525,GO:0017157,GO:0019003,GO:0019905,GO:0031105,GO:0045202,GO:0045921,GO:0032153,GO:0051301,GO:0032154,GO:0060271	plasma membrane|cell cortex|septin ring|synaptic vesicle|septin filament array|protein-containing complex scaffold activity|cellular protein localization|microtubule cytoskeleton|phosphatidylinositol binding|protein homodimerization activity|neuron projection|terminal bouton|axon terminus|mitotic cytokinesis|septin ring assembly|stress fiber|GTPase activity|protein binding|GTP binding|regulation …	rno05012	Parkinson's disease
NONRATT006744.2	0.308455	-1.69687	0.00771954	Down	Chr11	87072456	87074050	+	XM_008768903.2	0	sense	genic	intronic	nested	Prodh1	GeneID:680409,Genbank:XM_008768903.2,RGD:1590932	proline dehydrogenase 1, transcript variant X4	GO:0005739,GO:0006562,GO:0010133,GO:0010942,GO:0016597,GO:0055114,GO:0071949,GO:0004657	mitochondrion|proline catabolic process|proline catabolic process to glutamate|positive regulation of cell death|amino acid binding|oxidation-reduction process|FAD binding|proline dehydrogenase activity	rno00330	Arginine and proline metabolism
NONRATT006762.2	Inf	Inf	0.0304886	Up	Chr11	88122318	88123020	+	NM_001109433.1	0	sense	genic	exonic	nested	Sdf2l1	GeneID:680945,Genbank:NM_001109433.1,RGD:1585844	stromal cell-derived factor 2-like 1	GO:0016020,GO:0034663,GO:0034976,GO:0035269,GO:0042981,GO:0051087,GO:0051117,GO:0051787,GO:0071218,GO:0071712,GO:0004169,GO:0005783,GO:0005789	membrane|endoplasmic reticulum chaperone complex|response to endoplasmic reticulum stress|protein O-linked mannosylation|regulation of apoptotic process|chaperone binding|ATPase binding|misfolded protein binding|cellular response to misfolded protein|ER-associated misfolded protein catabolic process|dolichyl-phosphate-mannose-protein mannosyltransferase activity|endoplasmic reticulum|endoplasmic …
NONRATT006808.2	0.263284	-1.92531	0.0202151	Down	Chr11	12101355	12102200	-	XM_008768537.2	0	sense	genic	intronic	nested	Robo2	GeneID:84409,Genbank:XM_008768537.2,RGD:620167	roundabout guidance receptor 2, transcript variant X2	GO:0032870,GO:0007156,GO:0035385,GO:0007411,GO:0042802,GO:0007420,GO:0008046,GO:0009986,GO:0050772,GO:0016021,GO:0050925,GO:0016199,GO:0061364,GO:0021510,GO:0021891,GO:0001656,GO:0030673,GO:0001657,GO:0031290,GO:0005886	cellular response to hormone stimulus|homophilic cell adhesion via plasma membrane adhesion molecules|Roundabout signaling pathway|axon guidance|identical protein binding|brain development|axon guidance receptor activity|cell surface|positive regulation of axonogenesis|integral component of membrane|negative regulation of negative chemotaxis|axon midline choice point recognition|apoptotic process…	rno04360	Axon guidance
NONRATT006820.2	0.28175	-1.82751	0.00771627	Down	Chr11	17072477	17073643	-	XM_008768531.2	0	sense	genic	exonic	overlapping	RGD1563888	GeneID:360692,Genbank:XM_008768531.2,RGD:1563888	similar to DNA segment, Chr 16, ERATO Doi 472, expressed, transcript variant X1	GO:0021895,GO:0060999	cerebral cortex neuron differentiation|positive regulation of dendritic spine development
NONRATT006864.2	0.307504	-1.70132	0.00255186	Down	Chr11	31353588	31355032	-	NM_001100557.1	34482	antisense	intergenic	upstream	divergent	Olig2	GeneID:304103,Genbank:NM_001100557.1,RGD:1307098	oligodendrocyte lineage transcription factor 2	GO:0048709,GO:0005515,GO:0048714,GO:0005634,GO:0071837,GO:0005737,GO:0006355,GO:0007399,GO:0021522,GO:0021529,GO:0021530,GO:0021794,GO:0042552,GO:0042803,GO:0000122,GO:0045665,GO:0003700,GO:0048663,GO:0003705	oligodendrocyte differentiation|protein binding|positive regulation of oligodendrocyte differentiation|nucleus|HMG box domain binding|cytoplasm|regulation of transcription, DNA-templated|nervous system development|spinal cord motor neuron differentiation|spinal cord oligodendrocyte cell differentiation|spinal cord oligodendrocyte cell fate specification|thalamus development|myelination|protein ho…
NONRATT006938.2	0.455408	-1.13477	0.0495094	Down	Chr11	44217255	44221946	-	XM_006248210.3	0	antisense	genic	intronic	nested	St3gal6	GeneID:304023,Genbank:XM_006248210.3,RGD:1303279	ST3 beta-galactoside alpha-2,3-sialyltransferase 6, transcript variant X2	GO:0052798,GO:0005794,GO:0006464,GO:0006486,GO:0006664,GO:0008373,GO:0071354,GO:0009311,GO:0097503,GO:0000139,GO:0016021,GO:0003836,GO:0018279,GO:0005575	beta-galactoside alpha-2,3-sialyltransferase activity|Golgi apparatus|cellular protein modification process|protein glycosylation|glycolipid metabolic process|sialyltransferase activity|cellular response to interleukin-6|oligosaccharide metabolic process|sialylation|Golgi membrane|integral component of membrane|beta-galactoside (CMP) alpha-2,3-sialyltransferase activity|protein N-linked glycosyla…	rno00601	Glycosphingolipid biosynthesis - lacto and neolacto series
NONRATT007009.2	5.23889	2.38926	1.5659e-07	Up	Chr11	64715678	64718103	+	NM_001105879.1	1565	sense	intergenic	downstream	same_strand	Arhgap31	GeneID:288093,Genbank:NM_001105879.1,RGD:1306093	Rho GTPase activating protein 31	GO:0007264,GO:0017124,GO:0030027,GO:0043547,GO:0005096,GO:0005622	small GTPase mediated signal transduction|SH3 domain binding|lamellipodium|positive regulation of GTPase activity|GTPase activator activity|intracellular
NONRATT007024.2	Inf	Inf	0.000434981	Up	Chr11	66857677	66878547	-	XM_006248395.3	0	sense	genic	exonic	nested	Iqcb1	GeneID:303915,Genbank:XM_006248395.3,RGD:1310069	IQ motif containing B1, transcript variant X1	GO:0072686,GO:0005575,GO:0005654,GO:0005813,GO:0008150,GO:0015630,GO:0019899,GO:0032391,GO:0045171,GO:0045494,GO:0001750,GO:0048496,GO:0003674,GO:0060271,GO:0005516	mitotic spindle|cellular_component|nucleoplasm|centrosome|biological_process|microtubule cytoskeleton|enzyme binding|photoreceptor connecting cilium|intercellular bridge|photoreceptor cell maintenance|photoreceptor outer segment|maintenance of animal organ identity|molecular_function|cilium assembly|calmodulin binding
NONRATT007065.2	Inf	Inf	0.0343903	Up	Chr11	71008949	71010905	-	XM_017598173.1	0	sense	genic	exonic	nested	Lrch3	GeneID:303883,Genbank:XM_017598173.1,RGD:1306200	leucine rich repeats and calponin homology domain containing 3, transcript variant X4	GO:0007165,GO:0005829,GO:0005886	signal transduction|cytosol|plasma membrane
NONRATT007069.2	2.18827	1.12979	0.0230926	Up	Chr11	71117911	71124139	-	XM_008768736.1	0	sense	genic	exonic	nested	Fyttd1	GeneID:360726,Genbank:XM_008768736.1,RGD:1306899	forty-two-three domain containing 1, transcript variant X1	GO:0003729,GO:0005622,GO:0005654,GO:0006406,GO:0016021,GO:0016607	mRNA binding|intracellular|nucleoplasm|mRNA export from nucleus|integral component of membrane|nuclear speck
NONRATT007163.2	Inf	Inf	0.000232129	Up	Chr11	84664062	84664687	-	NM_181473.2	20389	sense	intergenic	upstream	same_strand	Klhl24	GeneID:303803,Genbank:NM_181473.2,RGD:727971	kelch-like family member 24	GO:0051865,GO:0031463,GO:0005737,GO:2000312,GO:0005912,GO:0016567,GO:0043204,GO:0045109,GO:0030057,GO:0004842,GO:0030424	protein autoubiquitination|Cul3-RING ubiquitin ligase complex|cytoplasm|regulation of kainate selective glutamate receptor activity|adherens junction|protein ubiquitination|perikaryon|intermediate filament organization|desmosome|ubiquitin-protein transferase activity|axon
NONRATT007222.2	8.14278	3.02552	0.0125347	Up	Chr12	2213723	2217002	+	XM_017598421.1	0	sense	genic	exonic	nested	Mcemp1	GeneID:498128,Genbank:XM_017598421.1,RGD:1565374	mast cell-expressed membrane protein 1, transcript variant X3	GO:0016021	integral component of membrane
NONRATT007251.2	Inf	Inf	0.00116562	Up	Chr12	8106659	8108972	+	NM_013111.3	0	sense	genic	exonic	nested	Slc7a1	GeneID:25648,Genbank:NM_013111.3,RGD:3716	solute carrier family 7 member 1	GO:0097638,GO:0015174,GO:1903352,GO:0015181,GO:1903826,GO:0015189,GO:0015802,GO:0015809,GO:0016021,GO:0022857,GO:0000064,GO:0032006,GO:0005886,GO:0055085,GO:0006865	L-arginine import across plasma membrane|basic amino acid transmembrane transporter activity|L-ornithine transmembrane transport|arginine transmembrane transporter activity|arginine transmembrane transport|L-lysine transmembrane transporter activity|basic amino acid transport|arginine transport|integral component of membrane|transmembrane transporter activity|L-ornithine transmembrane transporter…	rno05206	MicroRNAs in cancer
NONRATT007275.2	Inf	Inf	0.0452135	Up	Chr12	12388911	12389160	+	XM_017598316.1	0	sense	genic	exonic	nested	Tecpr1	GeneID:304285,Genbank:XM_017598316.1,RGD:1306873	tectonin beta-propeller repeat containing 1, transcript variant X1	GO:0097352,GO:0005654,GO:0005765,GO:0006914,GO:0016021,GO:0031410,GO:0032266,GO:0000421,GO:0043231	autophagosome maturation|nucleoplasm|lysosomal membrane|autophagy|integral component of membrane|cytoplasmic vesicle|phosphatidylinositol-3-phosphate binding|autophagosome membrane|intracellular membrane-bounded organelle
NONRATT007427.2	0.469555	-1.09064	0.0350964	Down	Chr12	28253247	28254189	+	XM_008769175.2	496	sense	intergenic	downstream	same_strand	LOC100362819	GeneID:100362819,Genbank:XM_008769175.2,RGD:2323959	autism susceptibility candidate 2-like, transcript variant X5	GO:0010592,GO:0015629,GO:0030426,GO:0031532,GO:0035022,GO:0045944,GO:0048675,GO:0051571,GO:0060013,GO:0097484,GO:0098582,GO:0001764,GO:2000620,GO:0003682,GO:0005634	positive regulation of lamellipodium assembly|actin cytoskeleton|growth cone|actin cytoskeleton reorganization|positive regulation of Rac protein signal transduction|positive regulation of transcription by RNA polymerase II|axon extension|positive regulation of histone H3-K4 methylation|righting reflex|dendrite extension|innate vocalization behavior|neuron migration|positive regulation of histone…
NONRATT007458.2	Inf	Inf	0.0348227	Up	Chr12	36642113	36642735	+	NM_017314.1	0	sense	genic	exonic	overlapping	Ubc	GeneID:50522,Genbank:NM_017314.1,RGD:621244	ubiquitin C	GO:0005737,GO:0006511,GO:0016567,GO:0019941,GO:0031386,GO:0031625,GO:0043209,GO:0070628,GO:0002020,GO:0005634	cytoplasm|ubiquitin-dependent protein catabolic process|protein ubiquitination|modification-dependent protein catabolic process|protein tag|ubiquitin protein ligase binding|myelin sheath|proteasome binding|protease binding|nucleus	rno03320	PPAR signaling pathway
NONRATT007490.2	4.68615	2.2284	0.0324032	Up	Chr12	38274371	38279899	+	XM_006249339.2	0	sense	genic	exonic	nested	Rsrc2	GeneID:360807,Genbank:XM_006249339.2,RGD:1564882	arginine and serine rich coiled-coil 2, transcript variant X2
NONRATT007563.2	Inf	Inf	4.32759e-06	Up	Chr12	41415067	41416057	+	XM_006249412.3	0	sense	genic	exonic	overlapping	Dtx1	GeneID:687424,Genbank:XM_006249412.3,RGD:1585380	deltex E3 ubiquitin ligase 1, transcript variant X1	GO:0005829,GO:0007219,GO:0008270,GO:0008593,GO:0010001,GO:0016604,GO:0031625,GO:0045581,GO:0045665,GO:1990830,GO:0005112,GO:0005654	cytosol|Notch signaling pathway|zinc ion binding|regulation of Notch signaling pathway|glial cell differentiation|nuclear body|ubiquitin protein ligase binding|negative regulation of T cell differentiation|negative regulation of neuron differentiation|cellular response to leukemia inhibitory factor|Notch binding|nucleoplasm	rno04330	Notch signaling pathway
NONRATT007595.2	3.9415	1.97874	0.00036951	Up	Chr12	45905236	45912668	+	NM_053612.2	0	sense	genic	exonic	overlapping	Hspb8	GeneID:113906,Genbank:NM_053612.2,RGD:71003	heat shock protein family B (small) member 8	GO:0005634,GO:0005737,GO:0005829,GO:0042802,GO:0004672,GO:0005622	nucleus|cytoplasm|cytosol|identical protein binding|protein kinase activity|intracellular
NONRATT007629.2	0.255094	-1.9709	0.00937445	Down	Chr12	48578931	48579546	+	NM_001013230.1	0	sense	genic	exonic	overlapping	Selplg	GeneID:363930,Genbank:NM_001013230.1,RGD:1307971	selectin P ligand	GO:0050900,GO:0050901,GO:0050902,GO:0071354,GO:0001931,GO:0005886,GO:0044853	leukocyte migration|leukocyte tethering or rolling|leukocyte adhesive activation|cellular response to interleukin-6|uropod|plasma membrane|plasma membrane raft	rno04514,rno05150	Cell adhesion molecules (CAMs)|Staphylococcus aureus infection
NONRATT007713.2	Inf	Inf	0.000215967	Up	Chr12	6711737	6715484	-	XM_341029.7	0	sense	genic	exonic	overlapping	Medag	GeneID:360757,Genbank:XM_341029.7,RGD:1307396	mesenteric estrogen-dependent adipogenesis	GO:0005737,GO:0045600	cytoplasm|positive regulation of fat cell differentiation
NONRATT007757.2	0.168372	-2.57028	0.0118597	Down	Chr12	12409870	12411750	-	NM_001137641.1	0	sense	genic	exonic	overlapping	Lmtk2	GeneID:304286,Genbank:NM_001137641.1,RGD:1598332	lemur tyrosine kinase 2	GO:0055037,GO:0033572,GO:0009968,GO:0004713,GO:0070374,GO:0033674,GO:0016021,GO:0004714,GO:0070853,GO:0043025,GO:0018105,GO:0004864,GO:0043066,GO:0004871,GO:0004888,GO:0005524,GO:0005737,GO:0018107,GO:0005769,GO:0043235,GO:0030154,GO:0005794,GO:0043410,GO:0030426,GO:0005829,GO:0045022,GO:0031434,GO:0005887,GO:0001881,GO:0046777,GO:0032456,GO:0006468,GO:0004674,GO:0048471,GO:0032515,GO:0007275,GO:…	recycling endosome|transferrin transport|negative regulation of signal transduction|protein tyrosine kinase activity|positive regulation of ERK1 and ERK2 cascade|positive regulation of kinase activity|integral component of membrane|transmembrane receptor protein tyrosine kinase activity|myosin VI binding|neuronal cell body|peptidyl-serine phosphorylation|protein phosphatase inhibitor activity|neg…
NONRATT007816.2	0.112975	-3.14592	2.53168e-05	Down	Chr12	19162180	19163267	-	XM_221997.8	2807	sense	intergenic	downstream	same_strand	Gjc3	GeneID:288529,Genbank:XM_221997.8,RGD:727930	gap junction protein, gamma 3	GO:0016021,GO:0042552,GO:0042803,GO:0043209,GO:0005922,GO:0007154,GO:0007605	integral component of membrane|myelination|protein homodimerization activity|myelin sheath|connexin complex|cell communication|sensory perception of sound
NONRATT007931.2	0.125724	-2.99167	2.08823e-08	Down	Chr12	36235585	36235806	-	NM_001134536.1	0	sense	genic	intronic	nested	Tmem132b	GeneID:304458,Genbank:NM_001134536.1,RGD:1566191	transmembrane protein 132B	GO:0003674,GO:0005575,GO:0008150	molecular_function|cellular_component|biological_process
NONRATT007948.2	Inf	Inf	0.000215281	Up	Chr12	37782930	37784043	-	NM_001170554.1	16444	antisense	intergenic	downstream	convergent	Mphosph9	GeneID:288654,Genbank:NM_001170554.1,RGD:1598368	M-phase phosphoprotein 9	GO:0005814,GO:0008150,GO:0003674,GO:0005575,GO:0005794	centriole|biological_process|molecular_function|cellular_component|Golgi apparatus
NONRATT008043.2	0.0793449	-3.65572	0.00710577	Down
NONRATT008045.2	0.336099	-1.57304	0.00259474	Down	Chr12	46331529	46361441	-	NM_001029911.1	0	sense	genic	exonic	overlapping	Cit	GeneID:83620,Genbank:NM_001029911.1,RGD:70878	citron rho-interacting serine/threonine kinase	GO:0032467,GO:0008064,GO:0000278,GO:0035556,GO:0015629,GO:0000281,GO:0043025,GO:0016301,GO:0001726,GO:0046872,GO:0004674,GO:0005515,GO:0005524,GO:0005737,GO:0016358,GO:0005773,GO:0048699,GO:0017048,GO:0005886,GO:0050774,GO:0030165,GO:0006468,GO:0051402,GO:0030496,GO:0007030,GO:0000070,GO:0051726,GO:0031985,GO:0007091,GO:0000086,GO:0097110,GO:0032154,GO:0007283	positive regulation of cytokinesis|regulation of actin polymerization or depolymerization|mitotic cell cycle|intracellular signal transduction|actin cytoskeleton|mitotic cytokinesis|neuronal cell body|kinase activity|ruffle|metal ion binding|protein serine/threonine kinase activity|protein binding|ATP binding|cytoplasm|dendrite development|vacuole|generation of neurons|Rho GTPase binding|plasma m…
NONRATT008046.2	0.405949	-1.30063	0.0104685	Down	Chr12	46413980	46432237	-	NM_001029911.1	0	sense	genic	exonic	nested	Cit	GeneID:83620,Genbank:NM_001029911.1,RGD:70878	citron rho-interacting serine/threonine kinase	GO:0032467,GO:0008064,GO:0000278,GO:0035556,GO:0015629,GO:0000281,GO:0043025,GO:0016301,GO:0001726,GO:0046872,GO:0004674,GO:0005515,GO:0005524,GO:0005737,GO:0016358,GO:0005773,GO:0048699,GO:0017048,GO:0005886,GO:0050774,GO:0030165,GO:0006468,GO:0051402,GO:0030496,GO:0007030,GO:0000070,GO:0051726,GO:0031985,GO:0007091,GO:0000086,GO:0097110,GO:0032154,GO:0007283	positive regulation of cytokinesis|regulation of actin polymerization or depolymerization|mitotic cell cycle|intracellular signal transduction|actin cytoskeleton|mitotic cytokinesis|neuronal cell body|kinase activity|ruffle|metal ion binding|protein serine/threonine kinase activity|protein binding|ATP binding|cytoplasm|dendrite development|vacuole|generation of neurons|Rho GTPase binding|plasma m…
NONRATT008144.2	0.181731	-2.46012	0.0307859	Down
NONRATT008214.2	0.442179	-1.1773	0.033143	Down	Chr13	50202769	50214825	+	XM_008769514.2	0	sense	genic	exonic	overlapping	Zbed6	GeneID:103693666,Genbank:XM_008769514.2,RGD:9238526	zinc finger, BED-type containing 6, transcript variant X1	GO:0000122	negative regulation of transcription by RNA polymerase II
NONRATT008218.2	Inf	Inf	0.0298924	Up	Chr13	50252709	50258947	+	NM_001271237.1	0	sense	genic	exonic	nested	Snrpe	GeneID:100360682,Genbank:NM_001271237.1,RGD:2321675	small nuclear ribonucleoprotein polypeptide E	GO:0071013,GO:0005683,GO:1990446,GO:0005685,GO:0005687,GO:0005689,GO:0005697,GO:0005829,GO:0008150,GO:0034709,GO:0034715,GO:0034719,GO:0000387,GO:0042633,GO:0005634,GO:0071007	catalytic step 2 spliceosome|U7 snRNP|U1 snRNP binding|U1 snRNP|U4 snRNP|U12-type spliceosomal complex|telomerase holoenzyme complex|cytosol|biological_process|methylosome|pICln-Sm protein complex|SMN-Sm protein complex|spliceosomal snRNP assembly|hair cycle|nucleus|U2-type catalytic step 2 spliceosome	rno03040	Spliceosome
NONRATT008294.2	5.73361	2.51944	7.93034e-09	Up	Chr13	67358261	67359342	+	NM_017232.3	1342	sense	intergenic	downstream	same_strand	Ptgs2	GeneID:29527,Genbank:NM_017232.3,RGD:620349	prostaglandin-endoperoxide synthase 2	GO:0005737,GO:0005783,GO:0005789,GO:0005901,GO:0006954,GO:0006979,GO:0010226,GO:0007566,GO:0010243,GO:0010575,GO:0007568,GO:0010942,GO:0014070,GO:0016702,GO:0019233,GO:0032355,GO:0019371,GO:0032496,GO:0032991,GO:0019899,GO:0033138,GO:0033280,GO:0034097,GO:0034605,GO:0001516,GO:0045786,GO:0034612,GO:0045907,GO:0034644,GO:0001525,GO:0045986,GO:0035633,GO:0004601,GO:0045987,GO:0004666,GO:0046697,GO:…	cytoplasm|endoplasmic reticulum|endoplasmic reticulum membrane|caveola|inflammatory response|response to oxidative stress|response to lithium ion|embryo implantation|response to organonitrogen compound|positive regulation of vascular endothelial growth factor production|aging|positive regulation of cell death|response to organic cyclic compound|oxidoreductase activity, acting on single donors wit…	rno00590,rno04370,rno04064,rno04668,rno04625,rno04657,rno04923,rno04913,rno04921,rno04726,rno04723,rno05200,rno05206,rno05204,rno05222,rno05167,rno05165,rno05140	Arachidonic acid metabolism|VEGF signaling pathway|NF-kappa B signaling pathway|TNF signaling pathway|C-type lectin receptor signaling pathway|IL-17 signaling pathway|Regulation of lipolysis in adipocyte|Ovarian Steroidogenesis|Oxytocin signaling pathway|Serotonergic synapse|Retrograde endocannabinoid signaling|Pathways in cancer|MicroRNAs in cancer|Chemical carcinogenesis|Small cell lung cancer|…
NONRATT008372.2	2.23314	1.15907	0.00773466	Up	Chr13	78852522	78855844	+	XM_006250110.3	299	antisense	intergenic	upstream	divergent	Zbtb37	GeneID:304918,Genbank:XM_006250110.3,RGD:1308731	zinc finger and BTB domain containing 37, transcript variant X4	GO:0003676	nucleic acid binding
NONRATT008373.2	24.3668	4.60685	0.00143665	Up	Chr13	78853131	78854210	+	XM_006250110.3	908	antisense	intergenic	upstream	divergent	Zbtb37	GeneID:304918,Genbank:XM_006250110.3,RGD:1308731	zinc finger and BTB domain containing 37, transcript variant X4	GO:0003676	nucleic acid binding
NONRATT008386.2	0.402087	-1.31442	0.00857605	Down	Chr13	78973627	78979300	+	XM_006250122.3	0	sense	genic	exonic	nested	Ankrd45	GeneID:289152,Genbank:XM_006250122.3,RGD:1311153	ankyrin repeat domain 45, transcript variant X3
NONRATT008406.2	18.3904	4.20088	0.0247874	Up	Chr13	82298566	82301357	+	NM_001025668.1	0	sense	genic	exonic	overlapping	Mettl18	GeneID:304928,Genbank:NM_001025668.1,RGD:1306783	methyltransferase like 18	GO:0032991,GO:0008168,GO:0031072,GO:0032259	protein-containing complex|methyltransferase activity|heat shock protein binding|methylation
NONRATT008471.2	0	#NAME?	2.19457e-07	Down	Chr13	90752841	90753344	+	XM_017598774.1	0	sense	genic	exonic	overlapping	Kcnj10	GeneID:29718,Genbank:XM_017598774.1,RGD:61822	potassium voltage-gated channel subfamily J member 10, transcript variant X1	GO:0006813,GO:0006954,GO:0007601,GO:0007628,GO:0009637,GO:0010107,GO:0051384,GO:0014003,GO:0051385,GO:0015272,GO:0051930,GO:0016323,GO:0051935,GO:0051938,GO:0055075,GO:0060075,GO:0060081,GO:0071805,GO:0097449,GO:0005102,GO:0005242,GO:0005267,GO:0005515,GO:0005524,GO:0005886,GO:0005887,GO:0005902,GO:0016324,GO:0021554,GO:0022010,GO:0034765,GO:0042391,GO:0098793,GO:0042802,GO:0048169,GO:0051289	potassium ion transport|inflammatory response|visual perception|adult walking behavior|response to blue light|potassium ion import|response to glucocorticoid|oligodendrocyte development|response to mineralocorticoid|ATP-activated inward rectifier potassium channel activity|regulation of sensory perception of pain|basolateral plasma membrane|glutamate reuptake|L-glutamate import|potassium ion home…	rno04971	Gastric acid secretion
NONRATT008472.2	0.200237	-2.32022	1.64493e-07	Down	Chr13	90753434	90756314	+	XM_017598775.1	97	sense	intergenic	downstream	same_strand	Kcnj10	GeneID:29718,Genbank:XM_017598775.1,RGD:61822	potassium voltage-gated channel subfamily J member 10, transcript variant X2	GO:0006813,GO:0006954,GO:0007601,GO:0007628,GO:0009637,GO:0010107,GO:0051384,GO:0014003,GO:0051385,GO:0015272,GO:0051930,GO:0016323,GO:0051935,GO:0051938,GO:0055075,GO:0060075,GO:0060081,GO:0071805,GO:0097449,GO:0005102,GO:0005242,GO:0005267,GO:0005515,GO:0005524,GO:0005886,GO:0005887,GO:0005902,GO:0016324,GO:0021554,GO:0022010,GO:0034765,GO:0042391,GO:0098793,GO:0042802,GO:0048169,GO:0051289	potassium ion transport|inflammatory response|visual perception|adult walking behavior|response to blue light|potassium ion import|response to glucocorticoid|oligodendrocyte development|response to mineralocorticoid|ATP-activated inward rectifier potassium channel activity|regulation of sensory perception of pain|basolateral plasma membrane|glutamate reuptake|L-glutamate import|potassium ion home…	rno04971	Gastric acid secretion
NONRATT008484.2	Inf	Inf	0.00341424	Up	Chr13	92559485	92559772	+	XM_017599005.1	9484	sense	intergenic	upstream	same_strand	Fmn2	GeneID:100360457,Genbank:XM_017599005.1,RGD:2322099	formin 2, transcript variant X1	GO:0046907,GO:0005789,GO:0048477,GO:0005819,GO:0051017,GO:0005829,GO:0005902,GO:0005938,GO:0006974,GO:0015629,GO:0051295,GO:0016192,GO:0051758,GO:0016344,GO:0070649,GO:0030659,GO:0071456,GO:0040038,GO:0003779,GO:0042177,GO:0005730,GO:0043066,GO:0005783	intracellular transport|endoplasmic reticulum membrane|oogenesis|spindle|actin filament bundle assembly|cytosol|microvillus|cell cortex|cellular response to DNA damage stimulus|actin cytoskeleton|establishment of meiotic spindle localization|vesicle-mediated transport|homologous chromosome movement towards spindle pole involved in homologous chromosome segregation|meiotic chromosome movement towa…
NONRATT008542.2	Inf	Inf	0.000925671	Up	Chr13	103371228	103371650	+	XM_006250426.3	0	sense	genic	exonic	nested	Eprs	GeneID:289352,Genbank:XM_006250426.3,RGD:1310952	glutamyl-prolyl-tRNA synthetase, transcript variant X2	GO:0042803,GO:0005524,GO:0051020,GO:0005737,GO:0071346,GO:0005829,GO:0006424,GO:0006433,GO:0097452,GO:0008270,GO:0017101,GO:0017148,GO:0004818,GO:0035613,GO:0004827,GO:0042802	protein homodimerization activity|ATP binding|GTPase binding|cytoplasm|cellular response to interferon-gamma|cytosol|glutamyl-tRNA aminoacylation|prolyl-tRNA aminoacylation|GAIT complex|zinc ion binding|aminoacyl-tRNA synthetase multienzyme complex|negative regulation of translation|glutamate-tRNA ligase activity|RNA stem-loop binding|proline-tRNA ligase activity|identical protein binding	rno00860,rno00970	Porphyrin and chlorophyll metabolism|Aminoacyl-tRNA biosynthesis
NONRATT008629.2	0.323529	-1.62804	0.00345355	Down	Chr13	25183295	25184928	-	XM_017598770.1	0	sense	genic	exonic	nested	Rnf152	GeneID:293561,Genbank:XM_017598770.1,RGD:1305251	ring finger protein 152, transcript variant X5	GO:1904262,GO:0034198,GO:0005764,GO:0046872,GO:0005765,GO:0061630,GO:0006915,GO:0010508,GO:0070534,GO:0031267,GO:0031301,GO:0070936,GO:0004842	negative regulation of TORC1 signaling|cellular response to amino acid starvation|lysosome|metal ion binding|lysosomal membrane|ubiquitin protein ligase activity|apoptotic process|positive regulation of autophagy|protein K63-linked ubiquitination|small GTPase binding|integral component of organelle membrane|protein K48-linked ubiquitination|ubiquitin-protein transferase activity	rno04150	mTOR signaling pathway
NONRATT008708.2	0.499277	-1.00209	0.0231581	Down	Chr13	50555453	50564219	-	XM_341118.8	0	sense	genic	exonic	nested	Plekha6	GeneID:360842,Genbank:XM_341118.8,RGD:1564395	pleckstrin homology domain containing A6, transcript variant X1
NONRATT008985.2	0.194468	-2.36239	0.0419228	Down	Chr13	90657562	90658652	-	NM_012505.2	0	sense	genic	exonic	nested	Atp1a2	GeneID:24212,Genbank:NM_012505.2,RGD:2168	ATPase Na+/K+ transporting subunit alpha 2	GO:0005524,GO:0005737,GO:0005768,GO:0005886,GO:0005890,GO:0005901,GO:0010248,GO:0006813,GO:0010882,GO:0006814,GO:0014704,GO:0006883,GO:0015988,GO:0015991,GO:0016020,GO:0042383,GO:0016887,GO:0019229,GO:0043005,GO:0019829,GO:0043197,GO:0043209,GO:0045202,GO:0045822,GO:0001504,GO:1903280,GO:0045988,GO:0002026,GO:1903416,GO:0046034,GO:0002087,GO:0051087,GO:0005391,GO:1990239,GO:0005515,GO:0006937,GO:…	ATP binding|cytoplasm|endosome|plasma membrane|sodium:potassium-exchanging ATPase complex|caveola|establishment or maintenance of transmembrane electrochemical gradient|potassium ion transport|regulation of cardiac muscle contraction by calcium ion signaling|sodium ion transport|intercalated disc|cellular sodium ion homeostasis|energy coupled proton transmembrane transport, against electrochemica…	rno04024,rno04022,rno04911,rno04918,rno04919,rno04925,rno04260,rno04261,rno04970,rno04971,rno04972,rno04976,rno04973,rno04974,rno04978,rno04960,rno04961,rno04964	cAMP signaling pathway|cGMP - PKG signaling pathway|Insulin secretion|Thyroid hormone synthesis|Thyroid hormone signaling pathway|Aldosterone synthesis and secretion|Cardiac muscle contraction|Adrenergic signaling in cardiomyocytes|Salivary secretion|Gastric acid secretion|Pancreatic secretion|Bile secretion|Carbohydrate digestion and absorption|Protein digestion and absorption|Mineral absorption…
NONRATT009049.2	0.388474	-1.36411	0.00500973	Down	Chr13	98718329	98719008	-	XM_001067525.5	3839	sense	intergenic	downstream	same_strand	Stum	GeneID:689499,Genbank:XM_001067525.5,RGD:1592263	stum, mechanosensory transduction mediator homolog, transcript variant X1	GO:0016021	integral component of membrane
NONRATT009063.2	3.09712	1.63093	0.00864021	Up	Chr13	99471867	99472457	-	XM_008769819.2	0	antisense	genic	intronic	nested	Cnih4	GeneID:289324,Genbank:XM_008769819.2,RGD:1559740	cornichon family AMPA receptor auxiliary protein 4, transcript variant X1	GO:0016021,GO:0031730,GO:0005783,GO:0005793,GO:0006888	integral component of membrane|CCR5 chemokine receptor binding|endoplasmic reticulum|endoplasmic reticulum-Golgi intermediate compartment|ER to Golgi vesicle-mediated transport
NONRATT009065.2	Inf	Inf	3.63422e-05	Up	Chr13	99509698	99522200	-	XM_017598903.1	0	sense	genic	exonic	nested	Wdr26	GeneID:498301,Genbank:XM_017598903.1,RGD:1565589	WD repeat domain 26, transcript variant X3	GO:0005739,GO:0005829,GO:0005654,GO:0005737	mitochondrion|cytosol|nucleoplasm|cytoplasm
NONRATT009159.2	0.110712	-3.17511	0.0487291	Down	Chr14	1357691	1358261	+	XM_017599404.1	0	sense	genic	exonic	nested	LOC102554605	GeneID:102554605,Genbank:XM_017599404.1,RGD:7616873	zinc finger protein 844-like, transcript variant X1
NONRATT009177.2	0.0140799	-6.15022	0.022485	Down	Chr14	2898240	2944544	+	XM_006250529.3	0	sense	genic	exonic	nested	Evi5	GeneID:100360066,Genbank:XM_006250529.3,RGD:2322879	ecotropic viral integration site 5, transcript variant X6	GO:0005794,GO:0005829,GO:0006886,GO:0012505,GO:0017137,GO:0031338,GO:0042147,GO:0043231,GO:0043547,GO:0005096,GO:0090630,GO:1902017,GO:0005622	Golgi apparatus|cytosol|intracellular protein transport|endomembrane system|Rab GTPase binding|regulation of vesicle fusion|retrograde transport, endosome to Golgi|intracellular membrane-bounded organelle|positive regulation of GTPase activity|GTPase activator activity|activation of GTPase activity|regulation of cilium assembly|intracellular
NONRATT009220.2	2.2601	1.17639	0.0448053	Up	Chr14	10842111	10850538	+	XM_006250677.2	4175	sense	intergenic	upstream	same_strand	Sec31a	GeneID:93646,Genbank:XM_006250677.2,RGD:620233	SEC31 homolog A, COPII coat complex component, transcript variant X2	GO:0051592,GO:0030127,GO:0005768,GO:0070971,GO:0030134,GO:0005783,GO:0005789,GO:0005829,GO:0006886,GO:0006888,GO:0043231,GO:0007029,GO:0090110,GO:0048306,GO:0015031,GO:0030120,GO:0048471,GO:0000139,GO:0090114,GO:0005198,GO:0005737	response to calcium ion|COPII vesicle coat|endosome|endoplasmic reticulum exit site|COPII-coated ER to Golgi transport vesicle|endoplasmic reticulum|endoplasmic reticulum membrane|cytosol|intracellular protein transport|ER to Golgi vesicle-mediated transport|intracellular membrane-bounded organelle|endoplasmic reticulum organization|cargo loading into COPII-coated vesicle|calcium-dependent protei…	rno04141	Protein processing in endoplasmic reticulum
NONRATT009221.2	4.55045	2.18601	0.0357057	Up	Chr14	10842287	10849190	+	XM_006250690.2	5523	sense	intergenic	upstream	same_strand	Sec31a	GeneID:93646,Genbank:XM_006250690.2,RGD:620233	SEC31 homolog A, COPII coat complex component, transcript variant X15	GO:0051592,GO:0030127,GO:0005768,GO:0070971,GO:0030134,GO:0005783,GO:0005789,GO:0005829,GO:0006886,GO:0006888,GO:0043231,GO:0007029,GO:0090110,GO:0048306,GO:0015031,GO:0030120,GO:0048471,GO:0000139,GO:0090114,GO:0005198,GO:0005737	response to calcium ion|COPII vesicle coat|endosome|endoplasmic reticulum exit site|COPII-coated ER to Golgi transport vesicle|endoplasmic reticulum|endoplasmic reticulum membrane|cytosol|intracellular protein transport|ER to Golgi vesicle-mediated transport|intracellular membrane-bounded organelle|endoplasmic reticulum organization|cargo loading into COPII-coated vesicle|calcium-dependent protei…	rno04141	Protein processing in endoplasmic reticulum
NONRATT009244.2	0.372785	-1.42359	0.00465947	Down	Chr14	16362868	16364325	+	NM_001105998.1	0	sense	genic	exonic	nested	Ccni	GeneID:289500,Genbank:NM_001105998.1,RGD:1309209	cyclin I	GO:0051726	regulation of cell cycle
NONRATT009300.2	2.36591	1.2424	0.0109773	Up	Chr14	33335610	33362193	+	NM_133621.2	0	sense	genic	exonic	overlapping	Hopx	GeneID:171160,Genbank:NM_133621.2,RGD:621841	HOP homeobox	GO:0005634,GO:0006351,GO:0006357,GO:0007507,GO:0008016,GO:0016575,GO:0043393,GO:0043415,GO:0045596,GO:0048286,GO:0000122,GO:0051131,GO:0001829,GO:0051155,GO:0003677	nucleus|transcription, DNA-templated|regulation of transcription by RNA polymerase II|heart development|regulation of heart contraction|histone deacetylation|regulation of protein binding|positive regulation of skeletal muscle tissue regeneration|negative regulation of cell differentiation|lung alveolus development|negative regulation of transcription by RNA polymerase II|chaperone-mediated prote…
NONRATT009316.2	0	-Inf	0.00571437	Down	Chr14	36071349	36118818	+	XM_006250903.3	0	sense	genic	exonic	nested	Lnx1	GeneID:360926,Genbank:XM_006250903.3,RGD:1308159	ligand of numb-protein X 1, transcript variant X3	GO:0016567,GO:0030165,GO:0051260,GO:0004842,GO:0005737,GO:0006511	protein ubiquitination|PDZ domain binding|protein homooligomerization|ubiquitin-protein transferase activity|cytoplasm|ubiquitin-dependent protein catabolic process
NONRATT009339.2	0	-Inf	0.031917	Down	Chr14	39797992	39798928	+	XM_017599106.1	0	sense	genic	exonic	nested	Gabra2	GeneID:289606,Genbank:XM_017599106.1,RGD:61856	gamma-aminobutyric acid type A receptor alpha2 subunit, transcript variant X1	GO:0005887,GO:0006821,GO:0006836,GO:0007165,GO:0007214,GO:0032590,GO:0007268,GO:0034220,GO:0008503,GO:0034707,GO:0042391,GO:0043005,GO:0043025,GO:1902476,GO:1902711,GO:0045202,GO:0045211,GO:1904315,GO:0001505,GO:0004890,GO:0005230,GO:0005237,GO:0005254,GO:0005886,GO:0016021,GO:0022851,GO:0030054,GO:0030285,GO:0030424,GO:0050877,GO:0030425,GO:0051932,GO:0060077,GO:0060078,GO:0098794,GO:0099565	integral component of plasma membrane|chloride transport|neurotransmitter transport|signal transduction|gamma-aminobutyric acid signaling pathway|dendrite membrane|chemical synaptic transmission|ion transmembrane transport|benzodiazepine receptor activity|chloride channel complex|regulation of membrane potential|neuron projection|neuronal cell body|chloride transmembrane transport|GABA-A receptor…	rno04080,rno04727,rno04723,rno04742,rno05032,rno05033	Neuroactive ligand-receptor interaction|GABAergic synapse|Retrograde endocannabinoid signaling|Taste transduction|Morphine addiction|Nicotine addiction
NONRATT009382.2	0.407942	-1.29356	0.00517505	Down	Chr14	48921147	48922983	+	XM_008770184.1	0	sense	genic	exonic	overlapping	Arap2	GeneID:305367,Genbank:XM_008770184.1,RGD:1306452	ArfGAP with RhoGAP domain, ankyrin repeat and PH domain 2, transcript variant X1	GO:0005737,GO:0005829,GO:0007165,GO:0016020,GO:0016192,GO:0031267,GO:0032012,GO:0035023,GO:0043231,GO:0043547,GO:0005096,GO:0005547	cytoplasm|cytosol|signal transduction|membrane|vesicle-mediated transport|small GTPase binding|regulation of ARF protein signal transduction|regulation of Rho protein signal transduction|intracellular membrane-bounded organelle|positive regulation of GTPase activity|GTPase activator activity|phosphatidylinositol-3,4,5-trisphosphate binding	rno04144	Endocytosis
NONRATT009455.2	2.30436	1.20437	0.0389693	Up	Chr14	86676283	86677441	+	NM_017101.1	0	sense	genic	exonic	nested	Ppia	GeneID:25518,Genbank:NM_017101.1,RGD:3372	peptidylprolyl isomerase A (cyclophilin A)	GO:0032991,GO:0000413,GO:0034389,GO:0003755,GO:0043209,GO:0005615,GO:0005634,GO:0045069,GO:0005829,GO:0006457,GO:0045070,GO:0016018,GO:0050714,GO:0030182,GO:0032515	protein-containing complex|protein peptidyl-prolyl isomerization|lipid particle organization|peptidyl-prolyl cis-trans isomerase activity|myelin sheath|extracellular space|nucleus|regulation of viral genome replication|cytosol|protein folding|positive regulation of viral genome replication|cyclosporin A binding|positive regulation of protein secretion|neuron differentiation|negative regulation of…	rno04217	Necroptosis
NONRATT009471.2	3.94906	1.98151	0.00217288	Up	Chr14	81428174	81428511	+	XM_006251164.2	1565	antisense	intergenic	upstream	divergent	Add1	GeneID:24170,Genbank:XM_006251164.2,RGD:2041	adducin 1, transcript variant X8	GO:0005654,GO:0005737,GO:0005856,GO:0005886,GO:0016604,GO:0005913,GO:0020027,GO:0030218,GO:0030425,GO:0045296,GO:0030507,GO:0045766,GO:0045807,GO:0030837,GO:0046982,GO:0048471,GO:0048873,GO:0000902,GO:1903393,GO:0051015,GO:0001701,GO:0005198,GO:0005515,GO:0005516,GO:0005634,GO:0006811,GO:0006884,GO:0007010,GO:0008134,GO:0008290,GO:0032092,GO:0014069,GO:0035264,GO:0016020,GO:0042608,GO:0042803,GO:…	nucleoplasm|cytoplasm|cytoskeleton|plasma membrane|nuclear body|cell-cell adherens junction|hemoglobin metabolic process|erythrocyte differentiation|dendrite|cadherin binding|spectrin binding|positive regulation of angiogenesis|positive regulation of endocytosis|negative regulation of actin filament polymerization|protein heterodimerization activity|perinuclear region of cytoplasm|homeostasis of …
NONRATT009508.2	2.54174	1.34582	0.0457434	Up	Chr14	83338019	83343386	+	XM_006251426.3	0	sense	genic	exonic	nested	Pisd	GeneID:681361,Genbank:XM_006251426.3,RGD:1596729	phosphatidylserine decarboxylase, transcript variant X3	GO:0005622,GO:0005634,GO:0005739,GO:0005743,GO:0006646,GO:0008654,GO:0016021,GO:0004609	intracellular|nucleus|mitochondrion|mitochondrial inner membrane|phosphatidylethanolamine biosynthetic process|phospholipid biosynthetic process|integral component of membrane|phosphatidylserine decarboxylase activity	rno00564	Glycerophospholipid metabolism
NONRATT009530.2	5.22399	2.38515	1.04344e-05	Up	Chr14	84501194	84502293	+	XM_006251364.3	621	sense	intergenic	downstream	same_strand	Lif	GeneID:60584,Genbank:XM_006251364.3,RGD:620865	leukemia inhibitory factor, transcript variant X1	GO:0005615,GO:0005622,GO:0005829,GO:0006955,GO:0007260,GO:0019827,GO:0007566,GO:0030324,GO:0031100,GO:0033138,GO:0033141,GO:0046697,GO:0046888,GO:0042531,GO:0048286,GO:0048644,GO:0001974,GO:0060290,GO:0048666,GO:0060426,GO:0005102,GO:0048708,GO:0005125,GO:0060463,GO:0005146,GO:0060707,GO:1903025,GO:0060708,GO:0070373,GO:0008083,GO:0008284,GO:0008285,GO:0010469,GO:0043410,GO:0010628,GO:0010976,GO:…	extracellular space|intracellular|cytosol|immune response|tyrosine phosphorylation of STAT protein|stem cell population maintenance|embryo implantation|lung development|animal organ regeneration|positive regulation of peptidyl-serine phosphorylation|positive regulation of peptidyl-serine phosphorylation of STAT protein|decidualization|negative regulation of hormone secretion|positive regulation o…	rno04630,rno04668,rno04060,rno04550	Jak-STAT signaling pathway|TNF signaling pathway|Cytokine-cytokine receptor interaction|Signaling pathways regulating pluripotency of stem cells
NONRATT009573.2	0.390147	-1.35791	0.0119784	Down	Chr14	94374800	94518480	+	XM_017599514.1	0	sense	genic	exonic	nested	LOC501396	GeneID:501396,Genbank:XM_017599514.1,RGD:1566206	hypothetical protein LOC501396, transcript variant X1
NONRATT009659.2	7.15231	2.83841	0.0327155	Up	Chr14	114079577	114080088	+	XM_006251605.3	46843	sense	intergenic	upstream	same_strand	Rtn4	GeneID:83765,Genbank:XM_006251605.3,RGD:620989	reticulon 4, transcript variant X1	GO:0005783,GO:0005789,GO:0005886,GO:0007399,GO:0007409,GO:0007413,GO:0021801,GO:0030176,GO:0030308,GO:0043005,GO:0030334,GO:0043025,GO:0030424,GO:0030517,GO:0043209,GO:0044294,GO:0001525,GO:0051292,GO:0044877,GO:0045296,GO:0005515,GO:0051897,GO:0005622,GO:0051930,GO:0005635,GO:0051960,GO:0060317,GO:1905552,GO:0005737,GO:0070571,GO:1905580,GO:0071782,GO:1905943,GO:1990809,GO:2000172,GO:0007568,GO:…	endoplasmic reticulum|endoplasmic reticulum membrane|plasma membrane|nervous system development|axonogenesis|axonal fasciculation|cerebral cortex radial glia guided migration|integral component of endoplasmic reticulum membrane|negative regulation of cell growth|neuron projection|regulation of cell migration|neuronal cell body|axon|negative regulation of axon extension|myelin sheath|dendritic gro…	rno05010	Alzheimer's disease
NONRATT009723.2	11.1153	3.47448	8.72503e-11	Up	Chr14	7222882	7226321	-	XM_006250632.3	0	sense	genic	exonic	nested	Aff1	GeneID:305152,Genbank:XM_006250632.3,RGD:1307940	AF4/FMR2 family, member 1, transcript variant X1	GO:0005575,GO:0005634,GO:0008023,GO:0008150,GO:0032783,GO:0045893,GO:0003674,GO:0003690,GO:0003700	cellular_component|nucleus|transcription elongation factor complex|biological_process|ELL-EAF complex|positive regulation of transcription, DNA-templated|molecular_function|double-stranded DNA binding|DNA binding transcription factor activity	rno05202	Transcriptional misregulation in cancers
NONRATT009739.2	Inf	Inf	6.52773e-14	Up	Chr14	10343289	10344206	-	XM_008770019.2	0	sense	genic	exonic	nested	Gpat3	GeneID:305166,Genbank:XM_008770019.2,RGD:1565703	glycerol-3-phosphate acyltransferase 3, transcript variant X1	GO:0005783,GO:0005789,GO:0016021,GO:0016024,GO:0019432,GO:0032006,GO:0102420,GO:0003841,GO:0004366	endoplasmic reticulum|endoplasmic reticulum membrane|integral component of membrane|CDP-diacylglycerol biosynthetic process|triglyceride biosynthetic process|regulation of TOR signaling|sn-1-glycerol-3-phosphate C16:0-DCA-CoA acyl transferase activity|1-acylglycerol-3-phosphate O-acyltransferase activity|glycerol-3-phosphate O-acyltransferase activity	rno00561,rno00564	Glycerolipid metabolism|Glycerophospholipid metabolism
NONRATT009743.2	0.366728	-1.44722	0.0176639	Down	Chr14	10652177	10652654	-	XM_002728074.5	26265	antisense	intergenic	downstream	convergent	LOC100363472	GeneID:100363472,Genbank:XM_002728074.5,RGD:2322973	nuclear receptor-binding factor 2-like, transcript variant X1
NONRATT009750.2	0	-Inf	0.000453093	Down	Chr14	11178827	11198276	-	XM_008770023.1	0	sense	genic	exonic	overlapping	Enoph1	GeneID:305177,Genbank:XM_008770023.1,RGD:1309016	enolase-phosphatase 1, transcript variant X2	GO:0016311,GO:0019509,GO:0043874,GO:0000287,GO:0005634,GO:0005737	dephosphorylation|L-methionine salvage from methylthioadenosine|acireductone synthase activity|magnesium ion binding|nucleus|cytoplasm	rno00270	Cysteine and methionine metabolism
NONRATT009827.2	47.6234	5.5736	0.00280335	Up	Chr14	33131982	33134321	-	XM_006250849.3	0	sense	genic	exonic	overlapping	Rest	GeneID:83618,Genbank:XM_006250849.3,RGD:621069	RE1-silencing transcription factor, transcript variant X2	GO:0001078,GO:0001228,GO:0002244,GO:0003676,GO:0003677,GO:0006357,GO:0006366,GO:0003682,GO:0008134,GO:0008285,GO:0032991,GO:0035690,GO:0010629,GO:0043065,GO:0000122,GO:0045892,GO:0043280,GO:0045893,GO:0000785,GO:0000981,GO:0045944,GO:0001046,GO:0045955,GO:0046676,GO:0001047,GO:0071385,GO:0046872,GO:0071805,GO:2000065,GO:2000706,GO:2000740,GO:2000798,GO:0003700,GO:0005515,GO:0005634,GO:0015271,GO:…	transcriptional repressor activity, RNA polymerase II proximal promoter sequence-specific DNA binding|transcriptional activator activity, RNA polymerase II transcription regulatory region sequence-specific DNA binding|hematopoietic progenitor cell differentiation|nucleic acid binding|DNA binding|regulation of transcription by RNA polymerase II|transcription by RNA polymerase II|chromatin binding|…	rno04550,rno05016	Signaling pathways regulating pluripotency of stem cells|Huntington's disease
NONRATT009875.2	Inf	Inf	0.0245586	Up	Chr14	42476229	42491422	-	XM_006250963.2	0	sense	genic	exonic	nested	Slc30a9	GeneID:498358,Genbank:XM_006250963.2,RGD:1593180	solute carrier family 30 member 9, transcript variant X1	GO:0005856,GO:0006829,GO:0006882,GO:0008324,GO:0016021,GO:0016922,GO:0030374,GO:0031410,GO:0045944,GO:0098655,GO:0003682,GO:0005634,GO:0005783	cytoskeleton|zinc ion transport|cellular zinc ion homeostasis|cation transmembrane transporter activity|integral component of membrane|ligand-dependent nuclear receptor binding|ligand-dependent nuclear receptor transcription coactivator activity|cytoplasmic vesicle|positive regulation of transcription by RNA polymerase II|cation transmembrane transport|chromatin binding|nucleus|endoplasmic reticu…
NONRATT009877.2	Inf	Inf	0.0271773	Up	Chr14	42489228	42489579	-	XM_006250965.3	0	sense	genic	exonic	nested	Slc30a9	GeneID:498358,Genbank:XM_006250965.3,RGD:1593180	solute carrier family 30 member 9, transcript variant X2	GO:0005856,GO:0006829,GO:0006882,GO:0008324,GO:0016021,GO:0016922,GO:0030374,GO:0031410,GO:0045944,GO:0098655,GO:0003682,GO:0005634,GO:0005783	cytoskeleton|zinc ion transport|cellular zinc ion homeostasis|cation transmembrane transporter activity|integral component of membrane|ligand-dependent nuclear receptor binding|ligand-dependent nuclear receptor transcription coactivator activity|cytoplasmic vesicle|positive regulation of transcription by RNA polymerase II|cation transmembrane transport|chromatin binding|nucleus|endoplasmic reticu…
NONRATT009905.2	Inf	Inf	0.0384443	Up	Chr14	44748678	44750430	-	NM_001191679.2	0	sense	genic	exonic	nested	Wdr19	GeneID:305349,Genbank:NM_001191679.2,RGD:1306997	WD repeat domain 19	GO:0060271,GO:0031514,GO:0005575,GO:0060830,GO:0032391,GO:0005654,GO:0060831,GO:0035721,GO:0005929,GO:0061055,GO:0007224,GO:0008150,GO:0008406,GO:0016604,GO:0097730,GO:0042471,GO:0048701,GO:0030326,GO:0050877,GO:0030991,GO:0000902,GO:0055123,GO:0001701,GO:0031076,GO:0003674	cilium assembly|motile cilium|cellular_component|ciliary receptor clustering involved in smoothened signaling pathway|photoreceptor connecting cilium|nucleoplasm|smoothened signaling pathway involved in dorsal/ventral neural tube patterning|intraciliary retrograde transport|cilium|myotome development|smoothened signaling pathway|biological_process|gonad development|nuclear body|non-motile cilium|…
NONRATT009916.2	2.96558	1.56832	0.0221269	Up	Chr18	43857375	43945241	-	XM_006251008.2	0	sense	genic	exonic	nested	Dtwd2	GeneID:361326,Genbank:XM_006251008.2,RGD:1306423	DTW domain containing 2, transcript variant X1	GO:1903955	positive regulation of protein targeting to mitochondrion
NONRATT009951.2	Inf	Inf	0.0115068	Up	Chr14	66762709	66771692	-	XM_006251057.3	0	sense	genic	exonic	nested	Pacrgl	GeneID:360947,Genbank:XM_006251057.3,RGD:1311045	PARK2 co-regulated-like, transcript variant X2
NONRATT010014.2	3.25578	1.70301	0.000449906	Up	Chr14	86800339	86803328	-	XM_006251218.3	3947	sense	intergenic	upstream	same_strand	Myo1g	GeneID:289785,Genbank:XM_006251218.3,RGD:1306016	myosin IG, transcript variant X1	GO:0031256,GO:0003779,GO:0031589,GO:0005524,GO:0038096,GO:0005546,GO:0005547,GO:0005886,GO:0005902,GO:0006887,GO:0043325,GO:0006909,GO:0071976,GO:0007018,GO:0120117,GO:0008017,GO:0016459,GO:0001891,GO:0030027,GO:0002456,GO:0030175,GO:0003777	leading edge membrane|actin binding|cell-substrate adhesion|ATP binding|Fc-gamma receptor signaling pathway involved in phagocytosis|phosphatidylinositol-4,5-bisphosphate binding|phosphatidylinositol-3,4,5-trisphosphate binding|plasma membrane|microvillus|exocytosis|phosphatidylinositol-3,4-bisphosphate binding|phagocytosis|cell gliding|microtubule-based movement|T cell meandering migration|micro…
NONRATT010021.2	6.20856	2.63426	0.0268888	Up	Chr14	86883089	86883338	-	XM_006251342.3	0	sense	genic	exonic	nested	Tbrg4	GeneID:360977,Genbank:XM_006251342.3,RGD:1309737	transforming growth factor beta regulator 4, transcript variant X1	GO:0005759,GO:0006468,GO:0016071,GO:0044528,GO:0045333,GO:0090615,GO:0004672,GO:0005739	mitochondrial matrix|protein phosphorylation|mRNA metabolic process|regulation of mitochondrial mRNA stability|cellular respiration|mitochondrial mRNA processing|protein kinase activity|mitochondrion
NONRATT010089.2	0.0913291	-3.45278	0.0331942	Down	Chr14	83950892	83951740	-	XM_017599221.1	0	sense	genic	exonic	nested	Osbp2	GeneID:305475,Genbank:XM_017599221.1,RGD:1310505	oxysterol binding protein 2, transcript variant X1	GO:0097440,GO:0006869,GO:0007286,GO:0015485	apical dendrite|lipid transport|spermatid development|cholesterol binding
NONRATT010091.2	4.08273	2.02953	0.00014778	Up	Chr14	84163970	84164965	-	NM_153316.2	0	sense	genic	exonic	nested	Slc35e4	GeneID:266687,Genbank:NM_153316.2,RGD:708484	solute carrier family 35, member E4	GO:0016021	integral component of membrane
NONRATT010111.2	3.07161	1.61899	0.000757792	Up	Chr14	85439806	85446379	-	NM_053649.1	0	sense	genic	exonic	overlapping	Kremen1	GeneID:114107,Genbank:NM_053649.1,RGD:620789	kringle containing transmembrane protein 1	GO:0006915,GO:0007154,GO:0007399,GO:0007517,GO:0016020,GO:0016021,GO:0016055,GO:0030279,GO:0060173,GO:0003674,GO:0090090,GO:0005886	apoptotic process|cell communication|nervous system development|muscle organ development|membrane|integral component of membrane|Wnt signaling pathway|negative regulation of ossification|limb development|molecular_function|negative regulation of canonical Wnt signaling pathway|plasma membrane
NONRATT010217.2	0	-Inf	0.00701436	Down	Chr14	115006910	115052456	-	XM_017599325.1	0	sense	genic	exonic	nested	Acyp2	GeneID:364224,Genbank:XM_017599325.1,RGD:1595836	acylphosphatase 2, transcript variant X1	GO:0003998,GO:0042802	acylphosphatase activity|identical protein binding	rno00620	Pyruvate metabolism
NONRATT010285.2	5.07001	2.34199	0.00423387	Up	Chr15	11915865	11916261	+	XM_008770482.2	2943	antisense	intergenic	upstream	divergent	Slc4a7	GeneID:117955,Genbank:XM_008770482.2,RGD:621208	solute carrier family 4 member 7, transcript variant X7	GO:0061299,GO:0021747,GO:0005886,GO:0098656,GO:0031410,GO:0005887,GO:0032420,GO:0006814,GO:0007601,GO:0008509,GO:0008510,GO:0015698,GO:0045202,GO:0015701,GO:0046666,GO:0051453,GO:0016323,GO:0060117,GO:0005452,GO:0016324,GO:0005737,GO:0060219	retina vasculature morphogenesis in camera-type eye|cochlear nucleus development|plasma membrane|anion transmembrane transport|cytoplasmic vesicle|integral component of plasma membrane|stereocilium|sodium ion transport|visual perception|anion transmembrane transporter activity|sodium:bicarbonate symporter activity|inorganic anion transport|synapse|bicarbonate transport|retinal cell programmed cel…
NONRATT010286.2	27.5108	4.78193	0.00843121	Up	Chr15	11916603	11916897	+	XM_008770482.2	3681	antisense	intergenic	upstream	divergent	Slc4a7	GeneID:117955,Genbank:XM_008770482.2,RGD:621208	solute carrier family 4 member 7, transcript variant X7	GO:0061299,GO:0021747,GO:0005886,GO:0098656,GO:0031410,GO:0005887,GO:0032420,GO:0006814,GO:0007601,GO:0008509,GO:0008510,GO:0015698,GO:0045202,GO:0015701,GO:0046666,GO:0051453,GO:0016323,GO:0060117,GO:0005452,GO:0016324,GO:0005737,GO:0060219	retina vasculature morphogenesis in camera-type eye|cochlear nucleus development|plasma membrane|anion transmembrane transport|cytoplasmic vesicle|integral component of plasma membrane|stereocilium|sodium ion transport|visual perception|anion transmembrane transporter activity|sodium:bicarbonate symporter activity|inorganic anion transport|synapse|bicarbonate transport|retinal cell programmed cel…
NONRATT010312.2	10.5402	3.39783	0.00448724	Up	Chr15	19688315	19688870	+	NM_001100509.1	0	sense	genic	exonic	nested	Psmc6	GeneID:289990,Genbank:NM_001100509.1,RGD:1308825	proteasome 26S subunit, ATPase 6	GO:0008540,GO:0016234,GO:0017025,GO:0022624,GO:0030433,GO:0031595,GO:0031597,GO:0036402,GO:0042802,GO:0045899,GO:0000502,GO:0090261,GO:0005524,GO:1901800,GO:0005634	proteasome regulatory particle, base subcomplex|inclusion body|TBP-class protein binding|proteasome accessory complex|ubiquitin-dependent ERAD pathway|nuclear proteasome complex|cytosolic proteasome complex|proteasome-activating ATPase activity|identical protein binding|positive regulation of RNA polymerase II transcriptional preinitiation complex assembly|proteasome complex|positive regulation o…	rno03050,rno05169	Proteasome|Epstein-Barr virus infection
NONRATT010333.2	4.7507	2.24814	0.000168729	Up	Chr15	24160089	24160774	+	NM_031832.1	0	sense	genic	exonic	nested	Lgals3	GeneID:83781,Genbank:NM_031832.1,RGD:69356	lectin, galactoside-binding, soluble, 3	GO:0005634,GO:0005681,GO:0005737,GO:0005743,GO:0030198,GO:0030246,GO:0005886,GO:0030593,GO:0006397,GO:0030855,GO:0031012,GO:0045806,GO:0048029,GO:0034988,GO:0048030,GO:0048245,GO:0048246,GO:0001501,GO:1902041,GO:0001772,GO:0050785,GO:1903769,GO:0050860,GO:0002548,GO:2000521,GO:2001189,GO:0005576,GO:2001200,GO:0005578,GO:2001237,GO:0005615,GO:0007165,GO:0008284,GO:0008380,GO:0009897,GO:0009986,GO:…	nucleus|spliceosomal complex|cytoplasm|mitochondrial inner membrane|extracellular matrix organization|carbohydrate binding|plasma membrane|neutrophil chemotaxis|mRNA processing|epithelial cell differentiation|extracellular matrix|negative regulation of endocytosis|monosaccharide binding|Fc-gamma receptor I complex binding|disaccharide binding|eosinophil chemotaxis|macrophage chemotaxis|skeletal s…
NONRATT010334.2	7.776	2.95903	0.00189932	Up	Chr15	24163040	24165538	+	NM_031832.1	0	sense	genic	exonic	overlapping	Lgals3	GeneID:83781,Genbank:NM_031832.1,RGD:69356	lectin, galactoside-binding, soluble, 3	GO:0005634,GO:0005681,GO:0005737,GO:0005743,GO:0030198,GO:0030246,GO:0005886,GO:0030593,GO:0006397,GO:0030855,GO:0031012,GO:0045806,GO:0048029,GO:0034988,GO:0048030,GO:0048245,GO:0048246,GO:0001501,GO:1902041,GO:0001772,GO:0050785,GO:1903769,GO:0050860,GO:0002548,GO:2000521,GO:2001189,GO:0005576,GO:2001200,GO:0005578,GO:2001237,GO:0005615,GO:0007165,GO:0008284,GO:0008380,GO:0009897,GO:0009986,GO:…	nucleus|spliceosomal complex|cytoplasm|mitochondrial inner membrane|extracellular matrix organization|carbohydrate binding|plasma membrane|neutrophil chemotaxis|mRNA processing|epithelial cell differentiation|extracellular matrix|negative regulation of endocytosis|monosaccharide binding|Fc-gamma receptor I complex binding|disaccharide binding|eosinophil chemotaxis|macrophage chemotaxis|skeletal s…
NONRATT010346.2	0.0370608	-4.75396	8.4078e-07	Down	Chr15	25085686	25086566	+	XM_017599664.1	0	sense	genic	exonic	overlapping	Peli2	GeneID:305835,Genbank:XM_017599664.1,RGD:1565884	pellino E3 ubiquitin protein ligase family member 2, transcript variant X1	GO:0005575,GO:0005829,GO:0006955,GO:0008063,GO:0008150,GO:0016020,GO:0032991,GO:0043410,GO:0061630,GO:0000209,GO:0001934,GO:0003674	cellular_component|cytosol|immune response|Toll signaling pathway|biological_process|membrane|protein-containing complex|positive regulation of MAPK cascade|ubiquitin protein ligase activity|protein polyubiquitination|positive regulation of protein phosphorylation|molecular_function
NONRATT010357.2	2.48777	1.31485	0.0399771	Up	Chr15	27230305	27231061	+	XM_006251847.3	2210	sense	intergenic	upstream	same_strand	Olr1615	GeneID:405371,Genbank:XM_006251847.3,RGD:1333946	olfactory receptor 1615, transcript variant X1	GO:0007186,GO:0016021,GO:0050911,GO:0004930,GO:0004984,GO:0005886	G-protein coupled receptor signaling pathway|integral component of membrane|detection of chemical stimulus involved in sensory perception of smell|G-protein coupled receptor activity|olfactory receptor activity|plasma membrane	rno04740	Olfactory transduction
NONRATT010360.2	3.49193	1.80402	0.0493369	Up	Chr15	27875918	27879677	+	XM_006251857.3	0	sense	genic	exonic	nested	Pnp	GeneID:290029,Genbank:XM_006251857.3,RGD:1597189	purine nucleoside phosphorylase, transcript variant X1	GO:0043101,GO:0006738,GO:0004731,GO:0046638,GO:0006955,GO:0070970,GO:0008144,GO:0005576,GO:0005622,GO:0005634,GO:0005737,GO:0034356,GO:0034418,GO:0005829,GO:0042102,GO:0042278,GO:0005856,GO:0001882,GO:0042301,GO:0006139,GO:0002060,GO:0042493,GO:0006148	purine-containing compound salvage|nicotinamide riboside catabolic process|purine-nucleoside phosphorylase activity|positive regulation of alpha-beta T cell differentiation|immune response|interleukin-2 secretion|drug binding|extracellular region|intracellular|nucleus|cytoplasm|NAD biosynthesis via nicotinamide riboside salvage pathway|urate biosynthetic process|cytosol|positive regulation of T c…	rno00230,rno00240,rno00760	Purine metabolism|Pyrimidine metabolism|Nicotinate and nicotinamide metabolism
NONRATT010372.2	13.8588	3.79273	0.0200158	Up	Chr15	28400550	28401795	+	NM_001271313.1	0	sense	genic	exonic	nested	Arhgef40	GeneID:361034,Genbank:NM_001271313.1,RGD:1308093	Rho guanine nucleotide exchange factor 40	GO:0005089,GO:0035023	Rho guanyl-nucleotide exchange factor activity|regulation of Rho protein signal transduction
NONRATT010518.2	41.9682	5.39123	0.0189138	Up	Chr15	44449085	44452259	-	XM_003751494.4	0	sense	genic	exonic	overlapping	Dock5	GeneID:305987,Genbank:XM_003751494.4,RGD:1306872	dedicator of cytokinesis 5, transcript variant X1	GO:0005829,GO:0005886,GO:0007264,GO:0010634,GO:1900026,GO:1904694,GO:1904754,GO:0005085,GO:0005737	cytosol|plasma membrane|small GTPase mediated signal transduction|positive regulation of epithelial cell migration|positive regulation of substrate adhesion-dependent cell spreading|negative regulation of vascular smooth muscle contraction|positive regulation of vascular associated smooth muscle cell migration|guanyl-nucleotide exchange factor activity|cytoplasm
NONRATT010539.2	7.99962	2.99993	0.00174614	Up	Chr15	46333304	46336194	+	XM_017599796.1	0	sense	genic	exonic	nested	Ctsb	GeneID:64529,Genbank:XM_017599796.1,RGD:621509	cathepsin B, transcript variant X1	GO:0005576,GO:0005615,GO:0005730,GO:0006914,GO:0005737,GO:0007283,GO:0005739,GO:0007519,GO:0008233,GO:0008234,GO:0009611,GO:0009612,GO:0042383,GO:0009749,GO:0042470,GO:0009897,GO:0043231,GO:0009986,GO:0043394,GO:0043434,GO:0043621,GO:0004175,GO:0060548,GO:0044877,GO:0070670,GO:0045471,GO:0004197,GO:0071260,GO:0046697,GO:0097067,GO:0005515,GO:0005518,GO:0005764,GO:0005901,GO:0006508,GO:0014070,GO:…	extracellular region|extracellular space|nucleolus|autophagy|cytoplasm|spermatogenesis|mitochondrion|skeletal muscle tissue development|peptidase activity|cysteine-type peptidase activity|response to wounding|response to mechanical stimulus|sarcolemma|response to glucose|melanosome|external side of plasma membrane|intracellular membrane-bounded organelle|cell surface|proteoglycan binding|response…	rno04142,rno04140,rno04210,rno04621,rno04612,rno04924	Lysosome|Autophagy - animal|Apoptosis|NOD-like receptor signaling pathway|Antigen processing and presentation|Renin secretion
NONRATT010559.2	2.58694	1.37125	0.016746	Up	Chr15	50901966	50903131	+	NM_031123.2	176	sense	intergenic	downstream	same_strand	Stc1	GeneID:81801,Genbank:NM_031123.2,RGD:621776	stanniocalcin 1	GO:0071456,GO:0030336,GO:0003674,GO:0086004,GO:0033280,GO:0005179,GO:0090280,GO:0035988,GO:0005615,GO:1903403,GO:0005634,GO:0005737,GO:0006874,GO:0044070,GO:0046697,GO:0007566,GO:0051926,GO:0010469,GO:0060348,GO:0010596,GO:0001503,GO:0071320,GO:0014070,GO:0001886,GO:0071385,GO:0016324,GO:0003421	cellular response to hypoxia|negative regulation of cell migration|molecular_function|regulation of cardiac muscle cell contraction|response to vitamin D|hormone activity|positive regulation of calcium ion import|chondrocyte proliferation|extracellular space|negative regulation of renal phosphate excretion|nucleus|cytoplasm|cellular calcium ion homeostasis|regulation of anion transport|decidualiz…
NONRATT010606.2	64.1662	6.00374	1.14277e-05	Up	Chr15	58577913	58579500	+	XM_006252340.3	0	sense	genic	exonic	nested	Tsc22d1	GeneID:498545,Genbank:XM_006252340.3,RGD:3850	TSC22 domain family, member 1, transcript variant X2	GO:0005634,GO:0005737,GO:0006355,GO:0006366,GO:0008284,GO:0043065,GO:0043066,GO:0045944,GO:0000978,GO:0001077,GO:0003700	nucleus|cytoplasm|regulation of transcription, DNA-templated|transcription by RNA polymerase II|positive regulation of cell proliferation|positive regulation of apoptotic process|negative regulation of apoptotic process|positive regulation of transcription by RNA polymerase II|RNA polymerase II proximal promoter sequence-specific DNA binding|transcriptional activator activity, RNA polymerase II p…
NONRATT010721.2	46.2929	5.53272	0.0284198	Up	Chr15	2686885	2688524	-	XM_006251640.1	0	sense	genic	exonic	nested	Samd8	GeneID:305684,Genbank:XM_006251640.1,RGD:1306447	sterile alpha motif domain containing 8, transcript variant X1	GO:0005829,GO:0005887,GO:0030148,GO:0030173,GO:0030176,GO:0033188,GO:0046513,GO:0047493,GO:1905373,GO:0002950,GO:2000303,GO:0005783	cytosol|integral component of plasma membrane|sphingolipid biosynthetic process|integral component of Golgi membrane|integral component of endoplasmic reticulum membrane|sphingomyelin synthase activity|ceramide biosynthetic process|ceramide cholinephosphotransferase activity|ceramide phosphoethanolamine biosynthetic process|ceramide phosphoethanolamine synthase activity|regulation of ceramide bio…
NONRATT010729.2	2.80442	1.4877	0.0133458	Up	Chr15	4025456	4026625	-	NM_001108369.1	0	sense	genic	exonic	nested	Chchd1	GeneID:361005,Genbank:NM_001108369.1,RGD:1307134	coiled-coil-helix-coiled-coil-helix domain containing 1	GO:0005654,GO:0005739,GO:0005761,GO:0005829,GO:0032543,GO:0001650	nucleoplasm|mitochondrion|mitochondrial ribosome|cytosol|mitochondrial translation|fibrillar center
NONRATT010761.2	Inf	Inf	2.05209e-07	Up	Chr15	12872409	12887889	-	XM_006251733.2	0	sense	genic	exonic	nested	RGD1306063	GeneID:289928,Genbank:XM_006251733.2,RGD:1306063	similar to HT021, transcript variant X4
NONRATT010829.2	0.382247	-1.38742	0.0217005	Down	Chr15	28115121	28115786	-	XM_006251898.3	0	sense	genic	intronic	nested	Ang2	GeneID:497229,Genbank:XM_006251898.3,RGD:1359373	angiogenin, ribonuclease A family, member 2, transcript variant X1	GO:0004540,GO:0005623,GO:0071333,GO:0090501,GO:0003676,GO:0004519	ribonuclease activity|cell|cellular response to glucose stimulus|RNA phosphodiester bond hydrolysis|nucleic acid binding|endonuclease activity
NONRATT010854.2	0	-Inf	0.0139017	Down	Chr15	33192796	33193544	-	XM_006251955.2	0	sense	genic	exonic	nested	Haus4	GeneID:305882,Genbank:XM_006251955.2,RGD:1305288	HAUS augmin-like complex, subunit 4, transcript variant X1	GO:0070652,GO:0005813,GO:0007098,GO:0051225	HAUS complex|centrosome|centrosome cycle|spindle assembly
NONRATT010887.2	0.0821316	-3.60592	0.0102141	Down	Chr15	34177303	34177837	-	XM_017599741.1	0	antisense	genic	intronic	nested	Carmil3	GeneID:361041,Genbank:XM_017599741.1,RGD:1359120	capping protein regulator and myosin 1 linker 3, transcript variant X9	GO:0005886,GO:0005737	plasma membrane|cytoplasm
NONRATT010938.2	0	-Inf	0.00135964	Down	Chr15	37402215	37409702	-	XM_006252080.3	0	sense	genic	exonic	nested	Gjb6	GeneID:84403,Genbank:XM_006252080.3,RGD:621830	gap junction protein, beta 6, transcript variant X2	GO:0051602,GO:0005921,GO:0071333,GO:0005922,GO:0006915,GO:0007154,GO:0007568,GO:0007605,GO:0008285,GO:0016021,GO:0016324,GO:0030054,GO:0032496,GO:0003674,GO:0042471,GO:0005829,GO:0048839	response to electrical stimulus|gap junction|cellular response to glucose stimulus|connexin complex|apoptotic process|cell communication|aging|sensory perception of sound|negative regulation of cell proliferation|integral component of membrane|apical plasma membrane|cell junction|response to lipopolysaccharide|molecular_function|ear morphogenesis|cytosol|inner ear development
NONRATT010963.2	0.452453	-1.14416	0.0484031	Down	Chr15	39691799	39692575	-	XM_017599890.1	0	sense	genic	intronic	nested	Setdb2	GeneID:100361710,Genbank:XM_017599890.1,RGD:2319564	SET domain, bifurcated 2, transcript variant X7	GO:0005654,GO:0005694,GO:0005829,GO:0007059,GO:0008270,GO:0046872,GO:0046974,GO:0051567,GO:0000278,GO:0003677,GO:0005634	nucleoplasm|chromosome|cytosol|chromosome segregation|zinc ion binding|metal ion binding|histone methyltransferase activity (H3-K9 specific)|histone H3-K9 methylation|mitotic cell cycle|DNA binding|nucleus	rno00310	Lysine degradation
NONRATT011036.2	0.156925	-2.67185	0.0415808	Down	Chr15	51196315	51207114	-	XM_008770835.2	0	antisense	genic	exonic	overlapping	LOC367277	GeneID:367277,Genbank:XM_008770835.2,RGD:1590801	similar to SET protein (Phosphatase 2A inhibitor I2PP2A) (I-2PP2A) (Template-activating factor I) (TAF-I) (Liver regeneration-related protein LRRGR00002), transcript variant X1
NONRATT011105.2	6.66946	2.73757	0.000522811	Up	Chr15	59764527	59765835	-	XM_017599960.1	0	antisense	genic	intronic	nested	Enox1	GeneID:306038,Genbank:XM_017599960.1,RGD:1306118	ecto-NOX disulfide-thiol exchanger 1, transcript variant X5	GO:0005886,GO:0008150,GO:0003674,GO:0003723,GO:0005575	plasma membrane|biological_process|molecular_function|RNA binding|cellular_component
NONRATT011117.2	0.319149	-1.6477	0.000424369	Down	Chr15	61551863	61552353	-	NM_054008.1	0	sense	genic	exonic	nested	Rgcc	GeneID:117183,Genbank:NM_054008.1,RGD:619721	regulator of cell cycle	GO:0005737,GO:0005813,GO:0006956,GO:0008285,GO:0010628,GO:0010718,GO:0016525,GO:0050715,GO:0019901,GO:0051091,GO:0051496,GO:0070412,GO:0071158,GO:0071456,GO:0071850,GO:0072537,GO:0090272,GO:0000079,GO:0001100,GO:0001937,GO:0003331,GO:0005634,GO:0005730,GO:0030295,GO:0031659,GO:0032147,GO:0032967,GO:0043537,GO:1901203,GO:0045840,GO:1901991,GO:0045944,GO:2000048,GO:0050710,GO:2000353,GO:2000573	cytoplasm|centrosome|complement activation|negative regulation of cell proliferation|positive regulation of gene expression|positive regulation of epithelial to mesenchymal transition|negative regulation of angiogenesis|positive regulation of cytokine secretion|protein kinase binding|positive regulation of DNA binding transcription factor activity|positive regulation of stress fiber assembly|R-SM…
NONRATT011215.2	0.053369	-4.22785	0.0464562	Down	Chr15	108800373	108801052	-	XM_017599721.1	0	antisense	genic	intronic	nested	Clybl	GeneID:306198,Genbank:XM_017599721.1,RGD:1304615	citrate lyase beta like, transcript variant X1	GO:0004474,GO:0047777,GO:0070207,GO:0106064,GO:0000287	malate synthase activity|(3S)-citramalyl-CoA lyase activity|protein homotrimerization|regulation of cobalamin metabolic process|magnesium ion binding
NONRATT011231.2	66.7889	6.06154	0.00143227	Up	Chr16	1782899	1864190	+	XM_006252538.3	0	sense	genic	exonic	nested	Zmiz1	GeneID:361103,Genbank:XM_006252538.3,RGD:1311620	zinc finger, MIZ-type containing 1, transcript variant X2	GO:0005654,GO:0007296,GO:0007569,GO:0008270,GO:0043231,GO:0045582,GO:0045747,GO:0045944,GO:0048146,GO:0048589,GO:0001570,GO:0048844,GO:0001701,GO:0003007	nucleoplasm|vitellogenesis|cell aging|zinc ion binding|intracellular membrane-bounded organelle|positive regulation of T cell differentiation|positive regulation of Notch signaling pathway|positive regulation of transcription by RNA polymerase II|positive regulation of fibroblast proliferation|developmental growth|vasculogenesis|artery morphogenesis|in utero embryonic development|heart morphogene…
NONRATT011233.2	3.25616	1.70317	0.00448108	Up	Chr16	1950294	1954629	+	NM_001108393.1	0	sense	genic	exonic	nested	Zmiz1	GeneID:361103,Genbank:NM_001108393.1,RGD:1311620	zinc finger, MIZ-type containing 1	GO:0005654,GO:0007296,GO:0007569,GO:0008270,GO:0043231,GO:0045582,GO:0045747,GO:0045944,GO:0048146,GO:0048589,GO:0001570,GO:0048844,GO:0001701,GO:0003007	nucleoplasm|vitellogenesis|cell aging|zinc ion binding|intracellular membrane-bounded organelle|positive regulation of T cell differentiation|positive regulation of Notch signaling pathway|positive regulation of transcription by RNA polymerase II|positive regulation of fibroblast proliferation|developmental growth|vasculogenesis|artery morphogenesis|in utero embryonic development|heart morphogene…
NONRATT011286.2	11.2834	3.49613	0.0153546	Up	Chr16	7343793	7344386	+	NM_001107292.1	0	sense	genic	exonic	nested	Bap1	GeneID:306257,Genbank:NM_001107292.1,RGD:1311938	Brca1 associated protein 1	GO:0004843,GO:0005634,GO:0005654,GO:0005737,GO:0035520,GO:0035522,GO:0005829,GO:0036459,GO:0050727,GO:0051726,GO:0001558,GO:0003682,GO:0006511,GO:0010035,GO:0016579,GO:0035517,GO:0061519,GO:0071108,GO:1900015,GO:1903955	thiol-dependent ubiquitin-specific protease activity|nucleus|nucleoplasm|cytoplasm|monoubiquitinated protein deubiquitination|monoubiquitinated histone H2A deubiquitination|cytosol|thiol-dependent ubiquitinyl hydrolase activity|regulation of inflammatory response|regulation of cell cycle|regulation of cell growth|chromatin binding|ubiquitin-dependent protein catabolic process|response to inorgani…
NONRATT011353.2	5.27695	2.3997	0.0267775	Up	Chr16	19172703	19202988	+	XM_017600167.1	0	sense	genic	exonic	nested	Eps15l1	GeneID:361120,Genbank:XM_017600167.1,RGD:1565708	epidermal growth factor receptor pathway substrate 15-like 1, transcript variant X4	GO:0005509,GO:0030132,GO:0045296	calcium ion binding|clathrin coat of coated pit|cadherin binding	rno04144	Endocytosis
NONRATT011365.2	2.51494	1.33052	0.0369932	Up	Chr16	19728287	19734370	+	NM_001271066.1	0	sense	genic	exonic	nested	Myo9b	GeneID:25486,Genbank:NM_001271066.1,RGD:3146	myosin IXb, transcript variant 1	GO:0003779,GO:0005096,GO:0005515,GO:0005516,GO:0005938,GO:0005524,GO:0007018,GO:0007266,GO:0008017,GO:0008270,GO:0030898,GO:0016459,GO:0016887,GO:0032011,GO:0032433,GO:0035023,GO:0000146,GO:0048246,GO:0035385,GO:0048471,GO:0001726,GO:0048495,GO:0002548,GO:0003777,GO:0051015,GO:0072673,GO:0005737,GO:0005829,GO:0005884,GO:0017048,GO:0030010,GO:0030027,GO:0035556,GO:0030048,GO:0042803,GO:0043008,GO:…	actin binding|GTPase activator activity|protein binding|calmodulin binding|cell cortex|ATP binding|microtubule-based movement|Rho protein signal transduction|microtubule binding|zinc ion binding|actin-dependent ATPase activity|myosin complex|ATPase activity|ARF protein signal transduction|filopodium tip|regulation of Rho protein signal transduction|microfilament motor activity|macrophage chemotax…
NONRATT011466.2	9.11121	3.18764	5.82263e-08	Up	Chr16	27597398	27598027	+	NM_001106081.1	159	sense	intergenic	downstream	same_strand	Tll1	GeneID:678743,Genbank:NM_001106081.1,RGD:1306120	tolloid-like 1	GO:0006508,GO:0008270,GO:0004222,GO:0005509,GO:0005518	proteolysis|zinc ion binding|metalloendopeptidase activity|calcium ion binding|collagen binding
NONRATT011512.2	Inf	Inf	6.59731e-29	Up	Chr16	49187205	49187480	+	XM_008771272.1	0	sense	genic	exonic	overlapping	Helt	GeneID:498633,Genbank:XM_008771272.1,RGD:1564073	helt bHLH transcription factor, transcript variant X2	GO:0042803,GO:0001967,GO:0045944,GO:0003677,GO:0003700,GO:0005634,GO:0005667,GO:0006351,GO:0007417,GO:0009791,GO:0010259,GO:0010467,GO:0021858,GO:0000122,GO:0030182,GO:0000978,GO:0035264,GO:0001078	protein homodimerization activity|suckling behavior|positive regulation of transcription by RNA polymerase II|DNA binding|DNA binding transcription factor activity|nucleus|transcription factor complex|transcription, DNA-templated|central nervous system development|post-embryonic development|multicellular organism aging|gene expression|GABAergic neuron differentiation in basal ganglia|negative reg…
NONRATT011603.2	0.324661	-1.62299	0.00174481	Down	Chr16	71784842	71786805	+	XM_017600147.1	0	sense	genic	exonic	nested	Htra4	GeneID:306564,Genbank:XM_017600147.1,RGD:1306242	HtrA serine peptidase 4, transcript variant X1	GO:0005520,GO:0005576,GO:0006508,GO:0001558,GO:0004175,GO:0004252	insulin-like growth factor binding|extracellular region|proteolysis|regulation of cell growth|endopeptidase activity|serine-type endopeptidase activity
NONRATT011683.2	0.458225	-1.12587	0.0117025	Down	Chr16	86672538	86675075	+	NM_001107328.2	489	sense	intergenic	downstream	same_strand	Efnb2	GeneID:306636,Genbank:NM_001107328.2,RGD:1309497	ephrin B2	GO:2000727,GO:0048013,GO:0005886,GO:0048514,GO:0007155,GO:0007411,GO:0008284,GO:0009887,GO:0010839,GO:0010977,GO:0048845,GO:0016021,GO:0050920,GO:0016477,GO:0072178,GO:0031295,GO:0001945,GO:1901216,GO:0046875,GO:0002042,GO:1903849,GO:0005102	positive regulation of cardiac muscle cell differentiation|ephrin receptor signaling pathway|plasma membrane|blood vessel morphogenesis|cell adhesion|axon guidance|positive regulation of cell proliferation|animal organ morphogenesis|negative regulation of keratinocyte proliferation|negative regulation of neuron projection development|venous blood vessel morphogenesis|integral component of membran…	rno04360	Axon guidance
NONRATT011734.2	0.265138	-1.91518	0.00348296	Down	Chr16	7000981	7001675	-	XM_006252649.1	0	sense	genic	exonic	nested	Itih3	GeneID:50693,Genbank:XM_006252649.1,RGD:620633	inter-alpha trypsin inhibitor, heavy chain 3, transcript variant X1	GO:0030212,GO:0004867,GO:0005576,GO:0010951	hyaluronan metabolic process|serine-type endopeptidase inhibitor activity|extracellular region|negative regulation of endopeptidase activity
NONRATT011739.2	2.18672	1.12877	0.0204468	Up	Chr16	7097579	7103524	-	NM_175580.2	0	sense	genic	exonic	containing	Gnl3	GeneID:290556,Genbank:NM_175580.2,RGD:631354	G protein nucleolar 3	GO:0042127,GO:0005525,GO:0042254,GO:0005634,GO:0048027,GO:0005654,GO:0005730,GO:0008283,GO:1902895,GO:0016604,GO:1904816,GO:0017145,GO:0019827,GO:0003924,GO:0032206,GO:0005515,GO:0033235	regulation of cell proliferation|GTP binding|ribosome biogenesis|nucleus|mRNA 5'-UTR binding|nucleoplasm|nucleolus|cell proliferation|positive regulation of pri-miRNA transcription by RNA polymerase II|nuclear body|positive regulation of protein localization to chromosome, telomeric region|stem cell division|stem cell population maintenance|GTPase activity|positive regulation of telomere maintena…	rno03008	Ribosome biogenesis in eukaryotes
NONRATT011742.2	5.9505	2.57301	0.00560013	Up	Chr16	7097581	7098064	-	NM_175580.2	0	sense	genic	exonic	nested	Gnl3	GeneID:290556,Genbank:NM_175580.2,RGD:631354	G protein nucleolar 3	GO:0042127,GO:0005525,GO:0042254,GO:0005634,GO:0048027,GO:0005654,GO:0005730,GO:0008283,GO:1902895,GO:0016604,GO:1904816,GO:0017145,GO:0019827,GO:0003924,GO:0032206,GO:0005515,GO:0033235	regulation of cell proliferation|GTP binding|ribosome biogenesis|nucleus|mRNA 5'-UTR binding|nucleoplasm|nucleolus|cell proliferation|positive regulation of pri-miRNA transcription by RNA polymerase II|nuclear body|positive regulation of protein localization to chromosome, telomeric region|stem cell division|stem cell population maintenance|GTPase activity|positive regulation of telomere maintena…	rno03008	Ribosome biogenesis in eukaryotes
NONRATT011767.2	2.1541	1.10708	0.0414087	Up	Chr16	8204620	8207144	-	NM_001134850.1	0	sense	genic	exonic	nested	Dph3	GeneID:680594,Genbank:NM_001134850.1,RGD:1590566	diphthamide biosynthesis 3	GO:0005654,GO:0005737,GO:0005829,GO:0009055,GO:0017183,GO:0046872,GO:0050709,GO:0051099,GO:0005634	nucleoplasm|cytoplasm|cytosol|electron transfer activity|peptidyl-diphthamide biosynthetic process from peptidyl-histidine|metal ion binding|negative regulation of protein secretion|positive regulation of binding|nucleus
NONRATT011768.2	4.46141	2.1575	0.0101596	Up	Chr16	8204620	8207412	-	NM_001134850.1	0	sense	genic	exonic	nested	Dph3	GeneID:680594,Genbank:NM_001134850.1,RGD:1590566	diphthamide biosynthesis 3	GO:0005654,GO:0005737,GO:0005829,GO:0009055,GO:0017183,GO:0046872,GO:0050709,GO:0051099,GO:0005634	nucleoplasm|cytoplasm|cytosol|electron transfer activity|peptidyl-diphthamide biosynthetic process from peptidyl-histidine|metal ion binding|negative regulation of protein secretion|positive regulation of binding|nucleus
NONRATT011819.2	4.12191	2.04331	0.0269421	Up	Chr16	19046025	19052027	-	NM_001107300.2	0	antisense	genic	intronic	overlapping	Med26	GeneID:306328,Genbank:NM_001107300.2,RGD:1309524	mediator complex subunit 26	GO:0005575,GO:0006357,GO:0008150,GO:0016592,GO:0001104,GO:0003674	cellular_component|regulation of transcription by RNA polymerase II|biological_process|mediator complex|RNA polymerase II transcription cofactor activity|molecular_function
NONRATT011877.2	2.81629	1.4938	0.00415878	Up	Chr16	20880452	20881000	-	NM_001115023.1	0	antisense	genic	exonic	nested	Ddx49	GeneID:290660,Genbank:NM_001115023.1,RGD:1311124	DEAD-box helicase 49	GO:0005737,GO:0010501,GO:0004004,GO:0005524,GO:0005730	cytoplasm|RNA secondary structure unwinding|ATP-dependent RNA helicase activity|ATP binding|nucleolus
NONRATT011880.2	5.15062	2.36475	0.0109729	Up	Chr16	20886500	20887545	-	NM_053310.1	0	sense	genic	intronic	nested	Homer3	GeneID:29548,Genbank:NM_053310.1,RGD:620706	homer scaffolding protein 3	GO:0007216,GO:0008022,GO:0014069,GO:0019904,GO:0030054,GO:0030425,GO:0035256,GO:0042802,GO:0043005,GO:0045178,GO:0005737,GO:0045211,GO:0005829,GO:2001256,GO:0005886	G-protein coupled glutamate receptor signaling pathway|protein C-terminus binding|postsynaptic density|protein domain specific binding|cell junction|dendrite|G-protein coupled glutamate receptor binding|identical protein binding|neuron projection|basal part of cell|cytoplasm|postsynaptic membrane|cytosol|regulation of store-operated calcium entry|plasma membrane	rno04068,rno04724	FoxO signaling pathway|Glutamatergic synapse
NONRATT011889.2	2.83971	1.50574	0.0459491	Up	Chr16	21037089	21038895	-	NM_001047104.1	0	sense	genic	exonic	overlapping	Nr2c2ap	GeneID:361128,Genbank:NM_001047104.1,RGD:1561190	nuclear receptor 2C2-associated protein	GO:0005654	nucleoplasm
NONRATT011917.2	0	-Inf	0.00154576	Down	Chr16	24998706	24999344	-	XM_017600176.1	0	sense	genic	exonic	overlapping	2019-03-01	GeneID:361135,Genbank:XM_017600176.1,RGD:1305148	membrane associated ring-CH-type finger 1, transcript variant X2	GO:0061630,GO:0005764,GO:0005765,GO:0005768,GO:0005789,GO:0005886,GO:0006955,GO:0008270,GO:0016021,GO:0016567,GO:0031901,GO:0031902,GO:0000209,GO:0032588,GO:0002495,GO:0042287,GO:0004842	ubiquitin protein ligase activity|lysosome|lysosomal membrane|endosome|endoplasmic reticulum membrane|plasma membrane|immune response|zinc ion binding|integral component of membrane|protein ubiquitination|early endosome membrane|late endosome membrane|protein polyubiquitination|trans-Golgi network membrane|antigen processing and presentation of peptide antigen via MHC class II|MHC protein binding…
NONRATT012033.2	0.145971	-2.77625	0.0325178	Down	Chr16	59364459	59366772	-	NM_001107314.1	0	sense	genic	exonic	nested	RGD1304810	GeneID:306504,Genbank:NM_001107314.1,RGD:1304810	similar to 6430573F11Rik protein	GO:0005737,GO:0008175,GO:0008198,GO:0016300,GO:0016706,GO:0030488,GO:0055114,GO:0000049,GO:0002098,GO:0005634	cytoplasm|tRNA methyltransferase activity|ferrous iron binding|tRNA (uracil) methyltransferase activity|oxidoreductase activity, acting on paired donors, with incorporation or reduction of molecular oxygen, 2-oxoglutarate as one donor, and incorporation of one atom each of oxygen into both donors|tRNA methylation|oxidation-reduction process|tRNA binding|tRNA wobble uridine modification|nucleus
NONRATT012064.2	2.33477	1.22328	0.0211126	Up	Chr16	71121607	71125272	-	NM_001109411.1	0	sense	genic	exonic	nested	Plpp5	GeneID:680466,Genbank:NM_001109411.1,RGD:1591734	phospholipid phosphatase 5	GO:0007165,GO:0008195,GO:0016791,GO:0046839,GO:0005575,GO:0005887,GO:0006644	signal transduction|phosphatidate phosphatase activity|phosphatase activity|phospholipid dephosphorylation|cellular_component|integral component of plasma membrane|phospholipid metabolic process	rno00561,rno00564	Glycerolipid metabolism|Glycerophospholipid metabolism
NONRATT012083.2	0.399025	-1.32545	0.0225207	Down	Chr16	73675064	73682643	-	NM_001107322.2	0	sense	genic	exonic	overlapping	Ank1	GeneID:306570,Genbank:NM_001107322.2,RGD:1309620	ankyrin 1	GO:0055072,GO:0030673,GO:0005886,GO:0072659,GO:0030863,GO:0031430,GO:0006779,GO:0006888,GO:0008093,GO:0010638,GO:0014731,GO:0031672,GO:0015672,GO:0042383,GO:0016020,GO:0043005,GO:0016529,GO:0045211,GO:0019899,GO:0005515,GO:0048821,GO:0030018,GO:0005622,GO:0051117,GO:0030507,GO:0005634	iron ion homeostasis|axolemma|plasma membrane|protein localization to plasma membrane|cortical cytoskeleton|M band|porphyrin-containing compound biosynthetic process|ER to Golgi vesicle-mediated transport|cytoskeletal adaptor activity|positive regulation of organelle organization|spectrin-associated cytoskeleton|A band|monovalent inorganic cation transport|sarcolemma|membrane|neuron projection|sa…	rno05205	Proteoglycans in cancer
NONRATT012153.2	4.77041	2.25411	0.0424753	Up	Chr16	83040451	83043088	-	XM_008771379.1	0	sense	genic	exonic	nested	Arhgef7	GeneID:114559,Genbank:XM_008771379.1,RGD:620624	Rho guanine nucleotide exchange factor 7, transcript variant X4	GO:0005737,GO:0005829,GO:0005886,GO:0005925,GO:0005938,GO:0032092,GO:0007030,GO:0032991,GO:0007264,GO:0035023,GO:0035556,GO:1904424,GO:0043005,GO:0043025,GO:0000322,GO:0001726,GO:0002244,GO:0005085,GO:0005089,GO:0005515,GO:0019901,GO:0030027,GO:0030032,GO:0043065,GO:0030426,GO:0043547,GO:0043615,GO:0048365,GO:0060124	cytoplasm|cytosol|plasma membrane|focal adhesion|cell cortex|positive regulation of protein binding|Golgi organization|protein-containing complex|small GTPase mediated signal transduction|regulation of Rho protein signal transduction|intracellular signal transduction|regulation of GTP binding|neuron projection|neuronal cell body|storage vacuole|ruffle|hematopoietic progenitor cell differentiation…	rno04810	Regulation of actin cytoskeleton
NONRATT012177.2	3.19281	1.67483	0.00116745	Up	Chr17	795752	825062	+	XM_017600473.1	0	sense	genic	exonic	nested	Npepo	GeneID:290963,Genbank:XM_017600473.1,RGD:1309592	aminopeptidase O, transcript variant X7	GO:0043171,GO:0005730,GO:0044255,GO:0070006,GO:0005737,GO:0006508,GO:0008237,GO:0008270,GO:0004177,GO:0042277,GO:0004301	peptide catabolic process|nucleolus|cellular lipid metabolic process|metalloaminopeptidase activity|cytoplasm|proteolysis|metallopeptidase activity|zinc ion binding|aminopeptidase activity|peptide binding|epoxide hydrolase activity
NONRATT012181.2	5.90316	2.56149	0.000819906	Up	Chr17	823958	825066	+	XM_008771431.2	0	sense	genic	exonic	overlapping	Npepo	GeneID:290963,Genbank:XM_008771431.2,RGD:1309592	aminopeptidase O, transcript variant X5	GO:0043171,GO:0005730,GO:0044255,GO:0070006,GO:0005737,GO:0006508,GO:0008237,GO:0008270,GO:0004177,GO:0042277,GO:0004301	peptide catabolic process|nucleolus|cellular lipid metabolic process|metalloaminopeptidase activity|cytoplasm|proteolysis|metallopeptidase activity|zinc ion binding|aminopeptidase activity|peptide binding|epoxide hydrolase activity
NONRATT012182.2	10.692	3.41845	2.10564e-07	Up	Chr17	824043	825078	+	XM_008771431.2	0	sense	genic	exonic	overlapping	Npepo	GeneID:290963,Genbank:XM_008771431.2,RGD:1309592	aminopeptidase O, transcript variant X5	GO:0043171,GO:0005730,GO:0044255,GO:0070006,GO:0005737,GO:0006508,GO:0008237,GO:0008270,GO:0004177,GO:0042277,GO:0004301	peptide catabolic process|nucleolus|cellular lipid metabolic process|metalloaminopeptidase activity|cytoplasm|proteolysis|metallopeptidase activity|zinc ion binding|aminopeptidase activity|peptide binding|epoxide hydrolase activity
NONRATT012375.2	0.292441	-1.77378	0.0376684	Down	Chr17	23337553	23338068	+	NM_214457.2	0	sense	genic	intronic	nested	Phactr1	GeneID:306844,Genbank:NM_214457.2,RGD:1303187	phosphatase and actin regulator 1	GO:0031532,GO:0003779,GO:0032515,GO:0004864,GO:0042325,GO:0005634,GO:0005829,GO:0008157,GO:0043149,GO:0030054,GO:0031032,GO:0045202,GO:0048870	actin cytoskeleton reorganization|actin binding|negative regulation of phosphoprotein phosphatase activity|protein phosphatase inhibitor activity|regulation of phosphorylation|nucleus|cytosol|protein phosphatase 1 binding|stress fiber assembly|cell junction|actomyosin structure organization|synapse|cell motility
NONRATT012497.2	Inf	Inf	0.00505314	Up	Chr17	49834497	49959750	+	NM_001271295.1	0	sense	genic	exonic	overlapping	Cdk13	GeneID:306998,Genbank:NM_001271295.1,RGD:1311226	cyclin-dependent kinase 13, transcript variant 1	GO:0030097,GO:0005634,GO:0030332,GO:0005694,GO:0005794,GO:0005829,GO:0006368,GO:0006468,GO:0008024,GO:0044212,GO:0008134,GO:0045944,GO:0008353,GO:0070816,GO:0016607,GO:0000380,GO:2000737,GO:0019901,GO:0002945,GO:0019908,GO:0004693	hemopoiesis|nucleus|cyclin binding|chromosome|Golgi apparatus|cytosol|transcription elongation from RNA polymerase II promoter|protein phosphorylation|cyclin/CDK positive transcription elongation factor complex|transcription regulatory region DNA binding|transcription factor binding|positive regulation of transcription by RNA polymerase II|RNA polymerase II carboxy-terminal domain kinase activity…
NONRATT012600.2	6.53536	2.70827	9.53906e-08	Up	Chr17	70712375	70713734	+	XM_006254193.3	0	sense	genic	exonic	nested	Pfkfb3	GeneID:117276,Genbank:XM_006254193.3,RGD:619776	6-phosphofructo-2-kinase/fructose-2,6-biphosphatase 3, transcript variant X2	GO:0004331,GO:0005524,GO:0005654,GO:0006000,GO:0006003,GO:0006110,GO:0007420,GO:0016311,GO:0046835,GO:0003873	fructose-2,6-bisphosphate 2-phosphatase activity|ATP binding|nucleoplasm|fructose metabolic process|fructose 2,6-bisphosphate metabolic process|regulation of glycolytic process|brain development|dephosphorylation|carbohydrate phosphorylation|6-phosphofructo-2-kinase activity	rno00051,rno04066,rno04152	Fructose and mannose metabolism|HIF-1 signaling pathway|AMPK signaling pathway
NONRATT012705.2	0.365943	-1.45031	0.00395128	Down	Chr17	1029241	1031079	-	NM_053566.1	1163	sense	intergenic	downstream	same_strand	Ptch1	GeneID:89830,Genbank:NM_053566.1,RGD:621425	patched 1	GO:0005119,GO:0005634,GO:0005794,GO:0005886,GO:0005901,GO:0005929,GO:0007165,GO:0009887,GO:0007224,GO:0009953,GO:0007346,GO:0009957,GO:0010157,GO:0010875,GO:0014069,GO:0030850,GO:0014070,GO:0030879,GO:0015485,GO:0032355,GO:0016021,GO:0032526,GO:0032880,GO:0035108,GO:0035137,GO:0000122,GO:0045606,GO:0040008,GO:0001658,GO:0045668,GO:0040015,GO:0001701,GO:0045879,GO:0001709,GO:0045892,GO:0001841,GO:…	smoothened binding|nucleus|Golgi apparatus|plasma membrane|caveola|cilium|signal transduction|animal organ morphogenesis|smoothened signaling pathway|dorsal/ventral pattern formation|regulation of mitotic cell cycle|epidermal cell fate specification|response to chlorate|positive regulation of cholesterol efflux|postsynaptic density|prostate gland development|response to organic cyclic compound|ma…	rno04340,rno04024,rno04360,rno05200,rno05205,rno05217	Hedgehog signaling pathway|cAMP signaling pathway|Axon guidance|Pathways in cancer|Proteoglycans in cancer|Basal cell carcinoma
NONRATT012861.2	4.14135	2.0501	0.00827759	Up	Chr17	20278174	20365695	-	XM_017600710.1	0	sense	genic	exonic	overlapping	Jarid2	GeneID:681740,Genbank:XM_017600710.1,RGD:1591663	jumonji and AT-rich interaction domain containing 2, transcript variant X4	GO:1990830,GO:0035098,GO:0001889,GO:0042127,GO:0003677,GO:0045892,GO:0003682,GO:0005634,GO:0005739,GO:0008134,GO:0048536,GO:0008285,GO:0048538,GO:0010614,GO:0048863,GO:0051574,GO:0031061,GO:0000122,GO:0060044,GO:0032452,GO:0000977,GO:0035097,GO:0001227	cellular response to leukemia inhibitory factor|ESC/E(Z) complex|liver development|regulation of cell proliferation|DNA binding|negative regulation of transcription, DNA-templated|chromatin binding|nucleus|mitochondrion|transcription factor binding|spleen development|negative regulation of cell proliferation|thymus development|negative regulation of cardiac muscle hypertrophy|stem cell differenti…	rno04550	Signaling pathways regulating pluripotency of stem cells
NONRATT012942.2	0.384503	-1.37893	0.0209864	Down	Chr17	37526920	37542020	-	NM_001271205.1	73002	antisense	intergenic	upstream	divergent	Sox4	GeneID:364712,Genbank:NM_001271205.1,RGD:1309488	SRY box 4	GO:0003183,GO:0003211,GO:0003215,GO:0003289,GO:0003357,GO:0003700,GO:0005634,GO:0030217,GO:0005654,GO:0031018,GO:0005737,GO:0031397,GO:0005739,GO:0031647,GO:0032024,GO:0035019,GO:0035910,GO:0060412,GO:0042593,GO:0060548,GO:0042769,GO:0060563,GO:0043065,GO:0060993,GO:0071333,GO:0090263,GO:2000761,GO:0000976,GO:0000981,GO:0001046,GO:0001077,GO:0001105,GO:0001501,GO:0001666,GO:0001841,GO:0002328,GO:…	mitral valve morphogenesis|cardiac ventricle formation|cardiac right ventricle morphogenesis|atrial septum primum morphogenesis|noradrenergic neuron differentiation|DNA binding transcription factor activity|nucleus|T cell differentiation|nucleoplasm|endocrine pancreas development|cytoplasm|negative regulation of protein ubiquitination|mitochondrion|regulation of protein stability|positive regulat…
NONRATT012957.2	3.44905	1.7862	0.0197071	Up	Chr17	42257840	42260611	-	NM_001305277.1	0	sense	genic	exonic	nested	LOC100911664	GeneID:100911664,Genbank:NM_001305277.1,RGD:6491729	uncharacterized LOC100911664	GO:0005622	intracellular
NONRATT013051.2	0.385557	-1.37498	0.00376905	Down	Chr17	59976439	59979246	-	XM_017600561.1	77831	antisense	intergenic	upstream	divergent	Mpp7	GeneID:307035,Genbank:XM_017600561.1,RGD:1305675	membrane palmitoylated protein 7, transcript variant X2	GO:0005923,GO:0019904,GO:0030054,GO:0031334,GO:0032947,GO:0045296,GO:0046982,GO:0070830,GO:0071896,GO:0097025,GO:0005654,GO:0005912	bicellular tight junction|protein domain specific binding|cell junction|positive regulation of protein complex assembly|protein-containing complex scaffold activity|cadherin binding|protein heterodimerization activity|bicellular tight junction assembly|protein localization to adherens junction|MPP7-DLG1-LIN7 complex|nucleoplasm|adherens junction
NONRATT013097.2	0.307932	-1.69932	0.0103353	Down	Chr17	72026745	72027532	-	XM_017600779.1	8267	sense	intergenic	downstream	same_strand	LOC684327	GeneID:684327,Genbank:XM_017600779.1,RGD:1591485	similar to inter-alpha (globulin) inhibitor H5, transcript variant X2
NONRATT013104.2	0.392945	-1.3476	0.0344765	Down
NONRATT013118.2	2.86288	1.51747	0.0161704	Up	Chr17	77446361	77447296	-	NM_001191834.1	1134	sense	intergenic	downstream	same_strand	Bend7	GeneID:361275,Genbank:NM_001191834.1,RGD:1305898	BEN domain containing 7
NONRATT013156.2	0.27563	-1.8592	0.0155197	Down	Chr17	84826185	84826549	-	XM_008771903.2	540	sense	intergenic	downstream	same_strand	Skida1	GeneID:680770,Genbank:XM_008771903.2,RGD:1588196	SKI/DACH domain containing 1, transcript variant X1
NONRATT013162.2	4.33177	2.11496	0.0348124	Up	Chr17	85009957	85046407	-	XM_002728514.4	0	sense	genic	exonic	nested	Dnajc1	GeneID:100360412,Genbank:XM_002728514.4,RGD:2322144	DnaJ heat shock protein family (Hsp40) member C1, transcript variant X1	GO:0005886,GO:0006417,GO:0006457,GO:0016021,GO:0050708,GO:0051087,GO:0003677,GO:0005634,GO:0005783	plasma membrane|regulation of translation|protein folding|integral component of membrane|regulation of protein secretion|chaperone binding|DNA binding|nucleus|endoplasmic reticulum	rno04141	Protein processing in endoplasmic reticulum
NONRATT013191.2	0.401288	-1.31729	0.033204	Down	Chr18	402485	407952	+	XM_017600984.1	0	sense	genic	exonic	overlapping	Fundc2	GeneID:361288,Genbank:XM_017600984.1,RGD:1560916	FUN14 domain containing 2, transcript variant X2	GO:0000422,GO:0005739,GO:0031307	autophagy of mitochondrion|mitochondrion|integral component of mitochondrial outer membrane
NONRATT013246.2	0.327045	-1.61244	0.00456355	Down	Chr18	14634529	14654836	+	XM_017601078.1	0	sense	genic	exonic	nested	Dtna	GeneID:307548,Genbank:XM_017601078.1,RGD:1561985	dystrobrevin, alpha, transcript variant X1	GO:0030165,GO:0030424,GO:0031234,GO:0042383,GO:0042995,GO:0045202,GO:0005515,GO:0005737,GO:0008270	PDZ domain binding|axon|extrinsic component of cytoplasmic side of plasma membrane|sarcolemma|cell projection|synapse|protein binding|cytoplasm|zinc ion binding
NONRATT013248.2	Inf	Inf	0.00240763	Up	Chr18	15372928	15374455	+	NM_001106160.1	0	sense	genic	exonic	nested	Trappc8	GeneID:291750,Genbank:NM_001106160.1,RGD:1309102	trafficking protein particle complex 8	GO:0007030,GO:0030008,GO:0030242,GO:0031410,GO:0032258,GO:0034497,GO:0044804,GO:1990072,GO:0000045,GO:0000407,GO:0006888	Golgi organization|TRAPP complex|autophagy of peroxisome|cytoplasmic vesicle|protein localization by the Cvt pathway|protein localization to phagophore assembly site|autophagy of nucleus|TRAPPIII protein complex|autophagosome assembly|phagophore assembly site|ER to Golgi vesicle-mediated transport
NONRATT013308.2	8.62022	3.10772	0.025461	Up	Chr18	26568721	26569662	+	XM_006254582.3	389	antisense	intergenic	downstream	convergent	Epb41l4a	GeneID:307514,Genbank:XM_006254582.3,RGD:1306034	erythrocyte membrane protein band 4.1 like 4A, transcript variant X5	GO:0031032,GO:0005200,GO:0005856	actomyosin structure organization|structural constituent of cytoskeleton|cytoskeleton
NONRATT013351.2	0.00290451	-8.42749	0.000110444	Down	Chr18	29118552	29120383	+	XM_006254619.3	0	sense	genic	exonic	nested	Igip	GeneID:100363266,Genbank:XM_006254619.3,RGD:2323374	IgA-inducing protein
NONRATT013354.2	2.29135	1.19619	0.00580357	Up	Chr18	29170700	29233776	+	XM_006254622.2	0	sense	genic	exonic	overlapping	Cystm1	GeneID:100363310,Genbank:XM_006254622.2,RGD:2323233	cysteine-rich transmembrane module containing 1, transcript variant X2
NONRATT013355.2	2.04801	1.03422	0.0234613	Up	Chr18	29171008	29222047	+	XM_006254621.3	0	sense	genic	exonic	nested	Cystm1	GeneID:100363310,Genbank:XM_006254621.3,RGD:2323233	cysteine-rich transmembrane module containing 1, transcript variant X1
NONRATT013374.2	0.382465	-1.3866	0.00375854	Down	Chr18	30446634	30446889	+	NM_001014779.1	9177	sense	intergenic	downstream	same_strand	Pcdhb8	GeneID:680020,Genbank:NM_001014779.1,RGD:1309895	protocadherin beta 8	GO:0005887,GO:0007155,GO:0007156,GO:0007267,GO:0007268,GO:0007416,GO:0008150,GO:0042802,GO:0003674,GO:0005509,GO:0005575	integral component of plasma membrane|cell adhesion|homophilic cell adhesion via plasma membrane adhesion molecules|cell-cell signaling|chemical synaptic transmission|synapse assembly|biological_process|identical protein binding|molecular_function|calcium ion binding|cellular_component
NONRATT013394.2	Inf	Inf	0.0241692	Up	Chr18	32283652	32340732	+	XM_006254650.3	0	sense	genic	exonic	nested	Fgf1	GeneID:25317,Genbank:XM_006254650.3,RGD:2605	fibroblast growth factor 1, transcript variant X1	GO:0005576,GO:0005578,GO:0005615,GO:0005634,GO:0005730,GO:0010469,GO:0005737,GO:0010595,GO:0005829,GO:0030154,GO:0030324,GO:0030335,GO:0045944,GO:0030544,GO:0050679,GO:0032148,GO:0051781,GO:0060681,GO:0072163,GO:0000187,GO:1901509,GO:0001525,GO:0001759,GO:0001934,GO:0005104,GO:0005178,GO:0005938,GO:0008083,GO:0008201,GO:0008283,GO:0008284,GO:0034605,GO:0008543,GO:0043406,GO:0044548,GO:0045542,GO:…	extracellular region|proteinaceous extracellular matrix|extracellular space|nucleus|nucleolus|regulation of signaling receptor activity|cytoplasm|positive regulation of endothelial cell migration|cytosol|cell differentiation|lung development|positive regulation of cell migration|positive regulation of transcription by RNA polymerase II|Hsp70 protein binding|positive regulation of epithelial cell …	rno04014,rno04015,rno04010,rno04390,rno04151,rno04810,rno05200,rno05226,rno05218,rno05224	Ras signaling pathway|Rap1 signaling pathway|MAPK signaling pathway|Hippo signaling pathway|PI3K-Akt signaling pathway|Regulation of actin cytoskeleton|Pathways in cancer|Gastric cancer|Melanoma|Breast cancer
NONRATT013426.2	0.138956	-2.8473	0.0298367	Down
NONRATT013487.2	0.23255	-2.10438	0.00300858	Down	Chr18	56284885	56285958	+	NM_012920.1	0	sense	genic	intronic	nested	Camk2a	GeneID:25400,Genbank:NM_012920.1,RGD:2261	calcium/calmodulin-dependent protein kinase II alpha	GO:0004683,GO:0005515,GO:0005516,GO:0006816,GO:0007399,GO:0005524,GO:0009931,GO:0005634,GO:0010666,GO:0032839,GO:0014069,GO:0035235,GO:0035254,GO:0035556,GO:0038166,GO:0000082,GO:0046928,GO:0042734,GO:0048168,GO:0042802,GO:0002931,GO:0048813,GO:0004674,GO:1902108,GO:0051092,GO:1903076,GO:0051928,GO:0005737,GO:0005739,GO:0006468,GO:0016301,GO:0018105,GO:0018107,GO:0030054,GO:0030154,GO:0042803,GO:…	calmodulin-dependent protein kinase activity|protein binding|calmodulin binding|calcium ion transport|nervous system development|ATP binding|calcium-dependent protein serine/threonine kinase activity|nucleus|positive regulation of cardiac muscle cell apoptotic process|dendrite cytoplasm|postsynaptic density|ionotropic glutamate receptor signaling pathway|glutamate receptor binding|intracellular s…	rno04012,rno04310,rno04066,rno04020,rno04024,rno04114,rno04217,rno04911,rno04922,rno04912,rno04921,rno04916,rno04925,rno04261,rno04971,rno04725,rno04728,rno04720,rno04722,rno04740,rno04750,rno04360,rno04713,rno05200,rno05205,rno05214,rno05031,rno04934,rno05152	ErbB signaling pathway|Wnt signaling pathway|HIF-1 signaling pathway|Calcium signaling pathway|cAMP signaling pathway|Oocyte meiosis|Necroptosis|Insulin secretion|Glucagon signaling pathway|GnRH signaling pathway|Oxytocin signaling pathway|Melanogenesis|Aldosterone synthesis and secretion|Adrenergic signaling in cardiomyocytes|Gastric acid secretion|Cholinergic synapse|Dopaminergic synapse|Long-t…
NONRATT013488.2	0.177487	-2.49422	0.0344492	Down	Chr18	56288382	56288613	+	NM_012920.1	0	sense	genic	exonic	nested	Camk2a	GeneID:25400,Genbank:NM_012920.1,RGD:2261	calcium/calmodulin-dependent protein kinase II alpha	GO:0004683,GO:0005515,GO:0005516,GO:0006816,GO:0007399,GO:0005524,GO:0009931,GO:0005634,GO:0010666,GO:0032839,GO:0014069,GO:0035235,GO:0035254,GO:0035556,GO:0038166,GO:0000082,GO:0046928,GO:0042734,GO:0048168,GO:0042802,GO:0002931,GO:0048813,GO:0004674,GO:1902108,GO:0051092,GO:1903076,GO:0051928,GO:0005737,GO:0005739,GO:0006468,GO:0016301,GO:0018105,GO:0018107,GO:0030054,GO:0030154,GO:0042803,GO:…	calmodulin-dependent protein kinase activity|protein binding|calmodulin binding|calcium ion transport|nervous system development|ATP binding|calcium-dependent protein serine/threonine kinase activity|nucleus|positive regulation of cardiac muscle cell apoptotic process|dendrite cytoplasm|postsynaptic density|ionotropic glutamate receptor signaling pathway|glutamate receptor binding|intracellular s…	rno04012,rno04310,rno04066,rno04020,rno04024,rno04114,rno04217,rno04911,rno04922,rno04912,rno04921,rno04916,rno04925,rno04261,rno04971,rno04725,rno04728,rno04720,rno04722,rno04740,rno04750,rno04360,rno04713,rno05200,rno05205,rno05214,rno05031,rno04934,rno05152	ErbB signaling pathway|Wnt signaling pathway|HIF-1 signaling pathway|Calcium signaling pathway|cAMP signaling pathway|Oocyte meiosis|Necroptosis|Insulin secretion|Glucagon signaling pathway|GnRH signaling pathway|Oxytocin signaling pathway|Melanogenesis|Aldosterone synthesis and secretion|Adrenergic signaling in cardiomyocytes|Gastric acid secretion|Cholinergic synapse|Dopaminergic synapse|Long-t…
NONRATT013504.2	2.90813	1.54009	0.0261229	Up	Chr18	58300433	58300982	+	XM_001071384.4	0	sense	genic	exonic	nested	Apcdd1	GeneID:689616,Genbank:XM_001071384.4,RGD:1589962	APC down-regulated 1	GO:0030178,GO:0042802,GO:0043615,GO:0001942,GO:0005887,GO:0017147	negative regulation of Wnt signaling pathway|identical protein binding|astrocyte cell migration|hair follicle development|integral component of plasma membrane|Wnt-protein binding
NONRATT013572.2	0	-Inf	3.68525e-23	Down	Chr18	70726936	70727462	+	XM_006254908.3	0	sense	genic	exonic	nested	Myo5b	GeneID:25132,Genbank:XM_006254908.3,RGD:621347	myosin Vb, transcript variant X8	GO:0050775,GO:0032991,GO:0005524,GO:0051015,GO:0035255,GO:0005903,GO:0043005,GO:0007018,GO:0055037,GO:0008017,GO:0015031,GO:0016192,GO:0016197,GO:0043025,GO:0060997,GO:0043197,GO:0016459,GO:1903078,GO:0045179,GO:0016887,GO:1903543,GO:0017137,GO:0003777,GO:1905430,GO:0045773,GO:0005515,GO:0048471,GO:0032880,GO:0005516	positive regulation of dendrite morphogenesis|protein-containing complex|ATP binding|actin filament binding|ionotropic glutamate receptor binding|brush border|neuron projection|microtubule-based movement|recycling endosome|microtubule binding|protein transport|vesicle-mediated transport|endosomal transport|neuronal cell body|dendritic spine morphogenesis|dendritic spine|myosin complex|positive re…
NONRATT013625.2	0.445971	-1.16498	0.0260722	Down	Chr18	79434340	79435400	+	XM_017600845.1	0	sense	genic	intronic	nested	Mbp	GeneID:24547,Genbank:XM_017600845.1,RGD:3054	myelin basic protein, transcript variant X1	GO:0007417,GO:0007568,GO:0007605,GO:0009636,GO:0019911,GO:0042552,GO:0042995,GO:0032570,GO:0043025,GO:0032991,GO:0043209,GO:1904685,GO:2000778,GO:0043218,GO:0000165,GO:0002020,GO:0005515,GO:0005516,GO:0005622,GO:0005886,GO:0033269,GO:0034115,GO:0034612,GO:0035633,GO:0046689,GO:0050771,GO:0061024,GO:0070542,GO:0071944,GO:1904209	central nervous system development|aging|sensory perception of sound|response to toxic substance|structural constituent of myelin sheath|myelination|cell projection|response to progesterone|neuronal cell body|protein-containing complex|myelin sheath|positive regulation of metalloendopeptidase activity|positive regulation of interleukin-6 secretion|compact myelin|MAPK cascade|protease binding|prot…
NONRATT013640.2	0.241141	-2.05205	0.0493569	Down	Chr18	83581368	83587982	+	NM_001107371.1	0	sense	genic	exonic	overlapping	Neto1	GeneID:307206,Genbank:NM_001107371.1,RGD:1566269	neuropilin and tolloid like 1	GO:0016021,GO:0035255,GO:0045202,GO:0048169,GO:0060076,GO:0097120,GO:0098839,GO:2000312,GO:2000463,GO:0007613,GO:0008542,GO:0014069	integral component of membrane|ionotropic glutamate receptor binding|synapse|regulation of long-term neuronal synaptic plasticity|excitatory synapse|receptor localization to synapse|postsynaptic density membrane|regulation of kainate selective glutamate receptor activity|positive regulation of excitatory postsynaptic potential|memory|visual learning|postsynaptic density
NONRATT013695.2	0.00296751	-8.39653	0.0460223	Down	Chr18	16450159	16453163	-	NM_001305179.1	0	sense	genic	exonic	nested	Rprd1a	GeneID:291736,Genbank:NM_001305179.1,RGD:1307374	regulation of nuclear pre-mRNA domain containing 1A	GO:0016591,GO:0042802,GO:0070940,GO:0003674,GO:0005575,GO:0008150	DNA-directed RNA polymerase II, holoenzyme|identical protein binding|dephosphorylation of RNA polymerase II C-terminal domain|molecular_function|cellular_component|biological_process
NONRATT013714.2	0.340493	-1.5543	0.00306941	Down	Chr18	24731029	24731898	-	XM_008772043.2	0	antisense	genic	exonic	nested	Lims2	GeneID:361303,Genbank:XM_008772043.2,RGD:1305273	LIM zinc finger domain containing 2, transcript variant X6	GO:0045216,GO:0046872,GO:0050680,GO:0098609,GO:2000178,GO:2000346,GO:2001046,GO:0005886,GO:0005925,GO:0043066	cell-cell junction organization|metal ion binding|negative regulation of epithelial cell proliferation|cell-cell adhesion|negative regulation of neural precursor cell proliferation|negative regulation of hepatocyte proliferation|positive regulation of integrin-mediated signaling pathway|plasma membrane|focal adhesion|negative regulation of apoptotic process
NONRATT013753.2	4.51676	2.17529	2.87836e-05	Up	Chr18	29330301	29332084	-	NM_012945.1	0	sense	genic	exonic	nested	Hbegf	GeneID:25433,Genbank:NM_012945.1,RGD:2526	heparin-binding EGF-like growth factor	GO:0035313,GO:0008201,GO:0005615,GO:0048661,GO:0050731,GO:0008284,GO:0005887,GO:0051545,GO:0007173,GO:0051549,GO:0009986,GO:0007399,GO:0051897,GO:0010469,GO:0008016,GO:0060326,GO:0016477,GO:0008083,GO:0005154,GO:0090303,GO:0030307,GO:0030335	wound healing, spreading of epidermal cells|heparin binding|extracellular space|positive regulation of smooth muscle cell proliferation|positive regulation of peptidyl-tyrosine phosphorylation|positive regulation of cell proliferation|integral component of plasma membrane|negative regulation of elastin biosynthetic process|epidermal growth factor receptor signaling pathway|positive regulation of …	rno04012,rno04912,rno04915,rno05205,rno05219,rno01522	ErbB signaling pathway|GnRH signaling pathway|Estrogen signaling pathway|Proteoglycans in cancer|Bladder cancer|Endocrine resistance
NONRATT013881.2	5.23048	2.38694	0.0139543	Up	Chr18	61685184	61689941	-	XM_017600812.1	0	sense	genic	exonic	nested	Lman1	GeneID:116666,Genbank:XM_017600812.1,RGD:71020	lectin, mannose-binding, 1, transcript variant X1	GO:0005789,GO:0005793,GO:0010638,GO:0005794,GO:0016021,GO:0030017,GO:0030134,GO:0032527,GO:0000139,GO:0005509,GO:0005537,GO:0005737,GO:0005783,GO:0006888,GO:0007029,GO:0033116,GO:0007030,GO:0034498,GO:0042802,GO:0043231,GO:0044220	endoplasmic reticulum membrane|endoplasmic reticulum-Golgi intermediate compartment|positive regulation of organelle organization|Golgi apparatus|integral component of membrane|sarcomere|COPII-coated ER to Golgi transport vesicle|protein exit from endoplasmic reticulum|Golgi membrane|calcium ion binding|mannose binding|cytoplasm|endoplasmic reticulum|ER to Golgi vesicle-mediated transport|endopla…	rno04141	Protein processing in endoplasmic reticulum
NONRATT013946.2	0.41189	-1.27967	0.0391056	Down	Chr18	73826161	73826696	-	NM_001164505.2	4593	sense	intergenic	downstream	same_strand	Rnf165	GeneID:307251,Genbank:NM_001164505.2,RGD:1560744	ring finger protein 165	GO:0043161,GO:0005634,GO:0060173,GO:0005737,GO:0060384,GO:0007409,GO:0008045,GO:0008270,GO:0010259,GO:0061061,GO:0016567,GO:0061630,GO:0030163,GO:0030513,GO:0000209,GO:0032991,GO:0035136	proteasome-mediated ubiquitin-dependent protein catabolic process|nucleus|limb development|cytoplasm|innervation|axonogenesis|motor neuron axon guidance|zinc ion binding|multicellular organism aging|muscle structure development|protein ubiquitination|ubiquitin protein ligase activity|protein catabolic process|positive regulation of BMP signaling pathway|protein polyubiquitination|protein-containi…
NONRATT013960.2	17.3862	4.11987	0.00263262	Up	Chr18	79237664	79238517	-	NM_012958.2	4492	sense	intergenic	downstream	same_strand	Galr1	GeneID:50577,Genbank:NM_012958.2,RGD:2656	galanin receptor 1	GO:0017046,GO:0005622,GO:0042923,GO:0005886,GO:0005887,GO:0007186,GO:0007189,GO:0007194,GO:0007200,GO:0045944,GO:0007204,GO:0007218,GO:0051464,GO:0008528,GO:0004966,GO:0016021	peptide hormone binding|intracellular|neuropeptide binding|plasma membrane|integral component of plasma membrane|G-protein coupled receptor signaling pathway|adenylate cyclase-activating G-protein coupled receptor signaling pathway|negative regulation of adenylate cyclase activity|phospholipase C-activating G-protein coupled receptor signaling pathway|positive regulation of transcription by RNA p…	rno04080	Neuroactive ligand-receptor interaction
NONRATT014093.2	2.06873	1.04875	0.0209396	Up	Chr19	23843602	23843936	+	NM_001108443.1	92586	antisense	intergenic	downstream	convergent	Zfp330	GeneID:361387,Genbank:NM_001108443.1,RGD:1307510	zinc finger protein 330	GO:0030496,GO:0000775,GO:0005730,GO:0008270	midbody|chromosome, centromeric region|nucleolus|zinc ion binding
NONRATT014170.2	0	-Inf	0.00622507	Down	Chr19	31611279	31614488	+	NM_001191817.1	0	sense	genic	exonic	overlapping	Hhip	GeneID:291936,Genbank:NM_001191817.1,RGD:1564108	Hedgehog-interacting protein	GO:0045879,GO:0005737,GO:0005886,GO:0048705,GO:0005887,GO:0007165,GO:0007224,GO:0007405,GO:0008270,GO:0060441,GO:0009887,GO:0097108,GO:0009953,GO:0009968,GO:0009986,GO:0003674,GO:0040036,GO:0003824,GO:0043066,GO:0005634	negative regulation of smoothened signaling pathway|cytoplasm|plasma membrane|skeletal system morphogenesis|integral component of plasma membrane|signal transduction|smoothened signaling pathway|neuroblast proliferation|zinc ion binding|epithelial tube branching involved in lung morphogenesis|animal organ morphogenesis|hedgehog family protein binding|dorsal/ventral pattern formation|negative regu…	rno04340,rno04024,rno05200,rno05217	Hedgehog signaling pathway|cAMP signaling pathway|Pathways in cancer|Basal cell carcinoma
NONRATT014171.2	0.438141	-1.19053	0.0312492	Down	Chr19	31618709	31621135	+	NM_001014271.1	0	antisense	genic	intronic	nested	LOC367515	GeneID:367515,Genbank:NM_001014271.1,RGD:1359286	similar to RIKEN cDNA 1700081O22
NONRATT014248.2	8.20674	3.03681	0.0410792	Up	Chr19	39610684	39612009	+	NM_001106184.1	0	sense	genic	exonic	nested	Wwp2	GeneID:291999,Genbank:NM_001106184.1,RGD:1310091	WW domain containing E3 ubiquitin protein ligase 2	GO:0051224,GO:0034765,GO:0001085,GO:0051865,GO:0001190,GO:0061630,GO:0042391,GO:0004842,GO:0005634,GO:0005737,GO:0006366,GO:0043161,GO:0006858,GO:0070534,GO:0008134,GO:0043433,GO:0010629,GO:1901016,GO:0045732,GO:0016567,GO:0000122,GO:0045892,GO:0045944,GO:0032410,GO:0000209	negative regulation of protein transport|regulation of ion transmembrane transport|RNA polymerase II transcription factor binding|protein autoubiquitination|transcriptional activator activity, RNA polymerase II transcription factor binding|ubiquitin protein ligase activity|regulation of membrane potential|ubiquitin-protein transferase activity|nucleus|cytoplasm|transcription by RNA polymerase II|…	rno04120	Ubiquitin mediated proteolysis
NONRATT014354.2	0.404707	-1.30505	0.00767363	Down	Chr19	54616326	54616947	+	NM_001014271.1	0	antisense	genic	intronic	nested	LOC367515	GeneID:367515,Genbank:NM_001014271.1,RGD:1359286	similar to RIKEN cDNA 1700081O22
NONRATT014418.2	0.41826	-1.25753	0.00520783	Down	Chr19	58861574	58862347	+	NM_021688.3	0	sense	genic	exonic	nested	Kcnk1	GeneID:59324,Genbank:NM_021688.3,RGD:621447	potassium two pore domain channel subfamily K member 1	GO:0005887,GO:0016021,GO:0016324,GO:0022841,GO:0043204,GO:0043231,GO:0045202,GO:0055037,GO:0060075,GO:0071805,GO:0005242,GO:0005249,GO:0005267,GO:0005272,GO:0005737,GO:0005768,GO:0030054,GO:0030322,GO:0030425,GO:0031526,GO:0034705,GO:0035094,GO:0035725,GO:1902937,GO:0042802	integral component of plasma membrane|integral component of membrane|apical plasma membrane|potassium ion leak channel activity|perikaryon|intracellular membrane-bounded organelle|synapse|recycling endosome|regulation of resting membrane potential|potassium ion transmembrane transport|inward rectifier potassium channel activity|voltage-gated potassium channel activity|potassium channel activity|s…
NONRATT014458.2	0.334501	-1.57992	0.0456585	Down	Chr19	10642299	10642926	-	XM_008772329.2	1341	sense	intergenic	downstream	same_strand	Cx3cl1	GeneID:89808,Genbank:XM_008772329.2,RGD:620458	C-X3-C motif chemokine ligand 1, transcript variant X1	GO:0005178,GO:0005576,GO:0005615,GO:0005737,GO:0005886,GO:0006935,GO:0010759,GO:0010976,GO:0006954,GO:0016021,GO:0006955,GO:0019221,GO:0030168,GO:0033622,GO:0030335,GO:0042060,GO:0030336,GO:0042995,GO:0043547,GO:0045766,GO:0045785,GO:0001666,GO:0050902,GO:0045906,GO:0001774,GO:0051041,GO:0048020,GO:0002052,GO:0048245,GO:0002523,GO:0060055,GO:0060080,GO:0002548,GO:0070098,GO:0070374,GO:0071346,GO:…	integrin binding|extracellular region|extracellular space|cytoplasm|plasma membrane|chemotaxis|positive regulation of macrophage chemotaxis|positive regulation of neuron projection development|inflammatory response|integral component of membrane|immune response|cytokine-mediated signaling pathway|platelet activation|integrin activation|positive regulation of cell migration|wound healing|negative …	rno04668,rno04060,rno04062	TNF signaling pathway|Cytokine-cytokine receptor interaction|Chemokine signaling pathway
NONRATT014519.2	Inf	Inf	0.0317906	Up	Chr19	19899576	19913572	-	NM_001106173.1	0	sense	genic	exonic	nested	Cnep1r1	GeneID:291914,Genbank:NM_001106173.1,RGD:1308816	CTD nuclear envelope phosphatase 1 regulatory subunit 1	GO:0010867,GO:0016021,GO:0031965,GO:0034504,GO:0035307,GO:0071595,GO:0005737,GO:0005829	positive regulation of triglyceride biosynthetic process|integral component of membrane|nuclear membrane|protein localization to nucleus|positive regulation of protein dephosphorylation|Nem1-Spo7 phosphatase complex|cytoplasm|cytosol
NONRATT014528.2	0.145129	-2.7846	0.00986451	Down	Chr19	22493197	22493878	-	NM_001107417.2	6668	antisense	intergenic	downstream	convergent	Neto2	GeneID:307757,Genbank:NM_001107417.2,RGD:1305310	neuropilin and tolloid like 2	GO:0035255,GO:0045202,GO:2000312,GO:2000463,GO:0014069,GO:0016021	ionotropic glutamate receptor binding|synapse|regulation of kainate selective glutamate receptor activity|positive regulation of excitatory postsynaptic potential|postsynaptic density|integral component of membrane
NONRATT014539.2	3.89948	1.96328	0.0219522	Up	Chr19	23939790	23941624	-	NM_001108443.1	0	sense	genic	exonic	nested	Zfp330	GeneID:361387,Genbank:NM_001108443.1,RGD:1307510	zinc finger protein 330	GO:0030496,GO:0000775,GO:0005730,GO:0008270	midbody|chromosome, centromeric region|nucleolus|zinc ion binding
NONRATT014566.2	0.439644	-1.18559	0.00919944	Down	Chr19	25818074	25820291	-	XM_006255308.3	0	sense	genic	exonic	overlapping	Nf1x	GeneID:81524,Genbank:XM_006255308.3,RGD:69080	nuclear factor 1 X, transcript variant X2	GO:0000981,GO:0001228,GO:0005634,GO:0005654,GO:0006260,GO:0006366,GO:0021549,GO:0021680,GO:0021707,GO:0045944,GO:0000122,GO:0048708,GO:0000977	RNA polymerase II transcription factor activity, sequence-specific DNA binding|transcriptional activator activity, RNA polymerase II transcription regulatory region sequence-specific DNA binding|nucleus|nucleoplasm|DNA replication|transcription by RNA polymerase II|cerebellum development|cerebellar Purkinje cell layer development|cerebellar granule cell differentiation|positive regulation of tran…
NONRATT014638.2	165.176	7.36786	5.05293e-16	Up	Chr19	37734665	37737481	-	NM_001135875.1	0	sense	genic	exonic	nested	Ranbp10	GeneID:361396,Genbank:NM_001135875.1,RGD:1311587	RAN binding protein 10	GO:0005881,GO:0008536,GO:0048487,GO:0000226,GO:0005087,GO:0005737	cytoplasmic microtubule|Ran GTPase binding|beta-tubulin binding|microtubule cytoskeleton organization|Ran guanyl-nucleotide exchange factor activity|cytoplasm
NONRATT014713.2	Inf	Inf	0.042385	Up	Chr19	43212264	43215176	-	XM_006255580.3	0	sense	genic	exonic	nested	Aars	GeneID:292023,Genbank:XM_006255580.3,RGD:1304832	alanyl-tRNA synthetase, transcript variant X1	GO:0050905,GO:0006419,GO:0002161,GO:0106074,GO:0002196,GO:0140018,GO:0004813,GO:0005524,GO:0005737,GO:0016597,GO:0005739,GO:0021680,GO:0005829,GO:0043524,GO:0000049,GO:0046872,GO:0006400,GO:0050885	neuromuscular process|alanyl-tRNA aminoacylation|aminoacyl-tRNA editing activity|aminoacyl-tRNA metabolism involved in translational fidelity|Ser-tRNA(Ala) hydrolase activity|regulation of cytoplasmic translational fidelity|alanine-tRNA ligase activity|ATP binding|cytoplasm|amino acid binding|mitochondrion|cerebellar Purkinje cell layer development|cytosol|negative regulation of neuron apoptotic …	rno00970	Aminoacyl-tRNA biosynthesis
NONRATT014883.2	4.70457	2.23406	0.0113204	Up
NONRATT014929.2	2.27615	1.18659	0.0161099	Up	Chr2	22908932	22909358	+	XM_006231775.3	192	sense	intergenic	upstream	same_strand	Homer1	GeneID:29546,Genbank:XM_006231775.3,RGD:628725	homer scaffolding protein 1, transcript variant X1	GO:0005886,GO:0007216,GO:0007623,GO:0014069,GO:0035256,GO:0035418,GO:0016020,GO:0042220,GO:0030018,GO:0042802,GO:0043005,GO:0048741,GO:0043025,GO:0043034,GO:0048875,GO:0051592,GO:0051928,GO:0003009,GO:0060076,GO:0005102,GO:0090279,GO:0005515,GO:0005737,GO:0005829,GO:0030054,GO:0030424,GO:0030425,GO:0031802,GO:0043198,GO:0032947,GO:0044325,GO:0035094,GO:0045177,GO:0045202,GO:0045211,GO:0046982,GO:…	plasma membrane|G-protein coupled glutamate receptor signaling pathway|circadian rhythm|postsynaptic density|G-protein coupled glutamate receptor binding|protein localization to synapse|membrane|response to cocaine|Z disc|identical protein binding|neuron projection|skeletal muscle fiber development|neuronal cell body|costamere|chemical homeostasis within a tissue|response to calcium ion|positive …	rno04068,rno04724	FoxO signaling pathway|Glutamatergic synapse
NONRATT014930.2	2.25363	1.17225	0.00679582	Up	Chr2	22909703	22910310	+	XM_006231775.3	0	sense	genic	exonic	nested	Homer1	GeneID:29546,Genbank:XM_006231775.3,RGD:628725	homer scaffolding protein 1, transcript variant X1	GO:0005886,GO:0007216,GO:0007623,GO:0014069,GO:0035256,GO:0035418,GO:0016020,GO:0042220,GO:0030018,GO:0042802,GO:0043005,GO:0048741,GO:0043025,GO:0043034,GO:0048875,GO:0051592,GO:0051928,GO:0003009,GO:0060076,GO:0005102,GO:0090279,GO:0005515,GO:0005737,GO:0005829,GO:0030054,GO:0030424,GO:0030425,GO:0031802,GO:0043198,GO:0032947,GO:0044325,GO:0035094,GO:0045177,GO:0045202,GO:0045211,GO:0046982,GO:…	plasma membrane|G-protein coupled glutamate receptor signaling pathway|circadian rhythm|postsynaptic density|G-protein coupled glutamate receptor binding|protein localization to synapse|membrane|response to cocaine|Z disc|identical protein binding|neuron projection|skeletal muscle fiber development|neuronal cell body|costamere|chemical homeostasis within a tissue|response to calcium ion|positive …	rno04068,rno04724	FoxO signaling pathway|Glutamatergic synapse
NONRATT014985.2	0.439251	-1.18688	0.0211878	Down	Chr2	36247980	36249095	+	NM_012585.1	85	sense	intergenic	downstream	same_strand	Htr1a	GeneID:24473,Genbank:NM_012585.1,RGD:2845	5-hydroxytryptamine receptor 1A	GO:0004993,GO:0005102,GO:0005515,GO:0005887,GO:0014062,GO:0007186,GO:0016020,GO:0007187,GO:0030425,GO:0007198,GO:0030594,GO:0031117,GO:0035640,GO:0051378,GO:0060259,GO:0042053,GO:0090722,GO:0097114,GO:0001662,GO:0001965,GO:0004930,GO:0007210,GO:0007268,GO:0008144,GO:0008283,GO:0042310,GO:0042428,GO:0043025,GO:0043203,GO:0046883,GO:0050795	G-protein coupled serotonin receptor activity|signaling receptor binding|protein binding|integral component of plasma membrane|regulation of serotonin secretion|G-protein coupled receptor signaling pathway|membrane|G-protein coupled receptor signaling pathway, coupled to cyclic nucleotide second messenger|dendrite|adenylate cyclase-inhibiting serotonin receptor signaling pathway|neurotransmitter …	rno04024,rno04080,rno04726,rno04742	cAMP signaling pathway|Neuroactive ligand-receptor interaction|Serotonergic synapse|Taste transduction
NONRATT015049.2	0.00964393	-6.69616	0.000900318	Down	Chr2	53114682	53115304	+	NM_019192.2	0	sense	genic	exonic	nested	Sepp1	GeneID:29360,Genbank:NM_019192.2,RGD:3660	selenoprotein P, plasma, 1, transcript variant 1	GO:0007626,GO:0008430,GO:0009791,GO:0010269,GO:0019953,GO:0040007,GO:0001887,GO:0005615,GO:0007420	locomotory behavior|selenium binding|post-embryonic development|response to selenium ion|sexual reproduction|growth|selenium compound metabolic process|extracellular space|brain development
NONRATT015073.2	2.37958	1.25071	0.00337537	Up	Chr2	56490994	56493956	+	XM_008760796.2	1649	sense	intergenic	downstream	same_strand	Lifr	GeneID:81680,Genbank:XM_008760796.2,RGD:621431	leukemia inhibitory factor receptor alpha, transcript variant X2	GO:0038165,GO:0014070,GO:0004923,GO:0043235,GO:0016021,GO:0019221,GO:0004924,GO:0046982,GO:0005127,GO:0005515,GO:0019838,GO:0005615,GO:0048812,GO:0048861,GO:0019955,GO:0005886,GO:0031100,GO:0008284,GO:0004897,GO:0070120,GO:0034097,GO:0010656	oncostatin-M-mediated signaling pathway|response to organic cyclic compound|leukemia inhibitory factor receptor activity|receptor complex|integral component of membrane|cytokine-mediated signaling pathway|oncostatin-M receptor activity|protein heterodimerization activity|ciliary neurotrophic factor receptor binding|protein binding|growth factor binding|extracellular space|neuron projection morpho…	rno04630,rno04060,rno04550	Jak-STAT signaling pathway|Cytokine-cytokine receptor interaction|Signaling pathways regulating pluripotency of stem cells
NONRATT015139.2	3.60726	1.85091	0.0463051	Up	Chr2	87003392	87010012	+	NM_173314.2	0	sense	genic	exonic	nested	Zfp455	GeneID:286979,Genbank:NM_173314.2,RGD:628788	zinc finger protein 455	GO:0005634,GO:0006355,GO:0046872,GO:0003676,GO:0003700,GO:0005622	nucleus|regulation of transcription, DNA-templated|metal ion binding|nucleic acid binding|DNA binding transcription factor activity|intracellular
NONRATT015146.2	0.294718	-1.76259	0.0010384	Down	Chr2	89843057	89844051	+	XM_017590727.1	274	antisense	intergenic	upstream	divergent	Ralyl	GeneID:294883,Genbank:XM_017590727.1,RGD:1305844	RALY RNA binding protein-like, transcript variant X8	GO:0003723,GO:0005634,GO:0042802	RNA binding|nucleus|identical protein binding
NONRATT015172.2	3.82328	1.93481	0.0194351	Up	Chr2	100677461	100708686	+	XM_006232168.1	0	sense	genic	exonic	nested	Ythdf3	GeneID:361920,Genbank:XM_006232168.1,RGD:1305234	YTH N(6)-methyladenosine RNA binding protein 3, transcript variant X3	GO:0061157,GO:1990247,GO:0043022,GO:0045727,GO:0045948	mRNA destabilization|N6-methyladenosine-containing RNA binding|ribosome binding|positive regulation of translation|positive regulation of translational initiation
NONRATT015195.2	0.0759893	-3.71806	0.0242101	Down	Chr2	115351331	115352788	+	NM_001100697.2	0	sense	genic	exonic	nested	Eif5a2	GeneID:310261,Genbank:NM_001100697.2,RGD:1306196	eukaryotic translation initiation factor 5A2	GO:0005575,GO:0006413,GO:0006452,GO:0008150,GO:0008284,GO:0043022,GO:0043231,GO:0045901,GO:0045905,GO:0003674,GO:0003743,GO:0003746	cellular_component|translational initiation|translational frameshifting|biological_process|positive regulation of cell proliferation|ribosome binding|intracellular membrane-bounded organelle|positive regulation of translational elongation|positive regulation of translational termination|molecular_function|translation initiation factor activity|translation elongation factor activity
NONRATT015198.2	2.1227	1.0859	0.0195475	Up	Chr2	115363870	115364739	+	NM_001108548.1	0	sense	genic	exonic	overlapping	Rpl22l1	GeneID:361923,Genbank:NM_001108548.1,RGD:1309517	ribosomal protein L22 like 1	GO:0022625,GO:0002181,GO:0003723,GO:0003735	cytosolic large ribosomal subunit|cytoplasmic translation|RNA binding|structural constituent of ribosome	rno03010	Ribosome
NONRATT015199.2	0.297256	-1.75022	0.0489665	Down	Chr2	115678339	115740197	+	NM_001134615.1	0	sense	genic	exonic	overlapping	Slc7a14	GeneID:499587,Genbank:NM_001134615.1,RGD:1594375	solute carrier family 7, member 14	GO:0055085,GO:0010923,GO:0016021,GO:0022857	transmembrane transport|negative regulation of phosphatase activity|integral component of membrane|transmembrane transporter activity
NONRATT015212.2	0	-Inf	0.000151332	Down	Chr2	119315626	119317503	+	XM_008760924.2	0	sense	genic	exonic	nested	Usp13	GeneID:310306,Genbank:XM_008760924.2,RGD:1306044	ubiquitin specific peptidase 13, transcript variant X1	GO:0070628,GO:0006511,GO:1904288,GO:0008270,GO:1904294,GO:0008283,GO:0010506,GO:0031625,GO:0035523,GO:0036459,GO:1904378,GO:0043130,GO:1904454,GO:0044313,GO:0044389,GO:0050821,GO:0004197,GO:0051087,GO:0004843,GO:0070536,GO:0006355	proteasome binding|ubiquitin-dependent protein catabolic process|BAT3 complex binding|zinc ion binding|positive regulation of ERAD pathway|cell proliferation|regulation of autophagy|ubiquitin protein ligase binding|protein K29-linked deubiquitination|thiol-dependent ubiquitinyl hydrolase activity|maintenance of unfolded protein involved in ERAD pathway|ubiquitin binding|ubiquitin-specific proteas…
NONRATT015220.2	0.421134	-1.24765	0.013002	Down	Chr2	121153324	121193232	+	XM_017591240.1	0	sense	genic	exonic	nested	LOC103691527	GeneID:103691527,Genbank:XM_017591240.1,RGD:9202401	uncharacterized LOC103691527, transcript variant X1
NONRATT015233.2	2.33099	1.22094	0.034332	Up	Chr2	123264714	123265200	+	XM_008760913.2	0	sense	genic	exonic	nested	Exosc9	GeneID:294975,Genbank:XM_008760913.2,RGD:1307888	exosome component 9, transcript variant X1	GO:0071035,GO:0034473,GO:0005730,GO:0000178,GO:0071038,GO:0034475,GO:0071042,GO:0034476,GO:0005737,GO:0043928,GO:0000228,GO:0000467,GO:0000956,GO:0006396,GO:0001102,GO:0016075,GO:0004532,GO:0045944,GO:0017091,GO:0005634,GO:0071028,GO:0005654,GO:0000176,GO:0030307,GO:0034427,GO:0000177	nuclear polyadenylation-dependent rRNA catabolic process|U1 snRNA 3'-end processing|nucleolus|exosome (RNase complex)|nuclear polyadenylation-dependent tRNA catabolic process|U4 snRNA 3'-end processing|nuclear polyadenylation-dependent mRNA catabolic process|U5 snRNA 3'-end processing|cytoplasm|exonucleolytic nuclear-transcribed mRNA catabolic process involved in deadenylation-dependent decay|nuc…	rno03018	RNA degradation
NONRATT015238.2	0	-Inf	0.00235605	Down	Chr2	123650421	123653247	+	XM_006232275.3	0	sense	genic	intronic	nested	RGD1307100	GeneID:294978,Genbank:XM_006232275.3,RGD:1307100	similar to RIKEN cDNA D630029K19, transcript variant X7	GO:0016021	integral component of membrane
NONRATT015294.2	Inf	Inf	0.0452208	Up	Chr2	144866511	144867527	+	NM_021584.2	0	sense	genic	exonic	nested	Dclk1	GeneID:83825,Genbank:NM_021584.2,RGD:68437	doublecortin-like kinase 1, transcript variant 2	GO:0048812,GO:0018105,GO:0004672,GO:0048813,GO:0018107,GO:0004674,GO:1900181,GO:0021952,GO:0005524,GO:0005622,GO:0006468,GO:0030424,GO:0030426,GO:0007409,GO:0030900,GO:0007420,GO:0035556,GO:0009615,GO:0001764,GO:0014069,GO:0048675	neuron projection morphogenesis|peptidyl-serine phosphorylation|protein kinase activity|dendrite morphogenesis|peptidyl-threonine phosphorylation|protein serine/threonine kinase activity|negative regulation of protein localization to nucleus|central nervous system projection neuron axonogenesis|ATP binding|intracellular|protein phosphorylation|axon|growth cone|axonogenesis|forebrain development|b…
NONRATT015325.2	0.221549	-2.1743	0.0100495	Down	Chr2	153882271	153883889	+	NM_012608.2	1362	sense	intergenic	downstream	same_strand	Mme	GeneID:24590,Genbank:NM_012608.2,RGD:3098	membrane metallo-endopeptidase	GO:0005886,GO:0005903,GO:0006508,GO:0019233,GO:0030424,GO:0006518,GO:0008021,GO:0030425,GO:0042277,GO:0071493,GO:0044306,GO:0090399,GO:0045202,GO:0097242,GO:0001822,GO:0004175,GO:0004222,GO:0005737,GO:0008233,GO:0008237,GO:0008238,GO:0008270,GO:0016020,GO:0046449,GO:0016021,GO:0050435,GO:0071345,GO:0071492	plasma membrane|brush border|proteolysis|sensory perception of pain|axon|peptide metabolic process|synaptic vesicle|dendrite|peptide binding|cellular response to UV-B|neuron projection terminus|replicative senescence|synapse|amyloid-beta clearance|kidney development|endopeptidase activity|metalloendopeptidase activity|cytoplasm|peptidase activity|metallopeptidase activity|exopeptidase activity|zi…	rno04640,rno04614,rno04974,rno05010	Hematopoietic cell lineage|Renin-angiotensin system|Protein digestion and absorption|Alzheimer's disease
NONRATT015328.2	0.349897	-1.515	0.00223706	Down	Chr2	154753178	154753450	+	NM_001099502.1	0	antisense	genic	intronic	nested	Vom2r46	GeneID:295091,Genbank:NM_001099502.1,RGD:735122	vomeronasal 2 receptor, 46	GO:0004930,GO:0004984,GO:0005887	G-protein coupled receptor activity|olfactory receptor activity|integral component of plasma membrane
NONRATT015515.2	13.7689	3.78334	1.31422e-05	Up	Chr2	192669135	192669930	-	NM_021864.1	0	sense	genic	exonic	overlapping	Sprr1a	GeneID:499660,Genbank:NM_021864.1,RGD:1593163	small proline-rich protein 1A	GO:0005198,GO:0005737,GO:0018149,GO:0030216,GO:0030280,GO:0030674,GO:0031424,GO:0001533,GO:0071944	structural molecule activity|cytoplasm|peptide cross-linking|keratinocyte differentiation|structural constituent of epidermis|protein binding, bridging|keratinization|cornified envelope|cell periphery
NONRATT015666.2	3.03968	1.60392	0.0455579	Up	Chr2	207279523	207280030	+	XM_006233085.2	0	antisense	genic	exonic	nested	Mov10	GeneID:310756,Genbank:XM_006233085.2,RGD:1598327	Mov10 RISC complex RNA helicase, transcript variant X3	GO:0005829,GO:0008150,GO:0035195,GO:0035279,GO:0000932,GO:0003674,GO:0005575	cytosol|biological_process|gene silencing by miRNA|mRNA cleavage involved in gene silencing by miRNA|P-body|molecular_function|cellular_component
NONRATT015700.2	0.0430145	-4.53903	0.0231899	Down	Chr2	211153057	211156313	+	XM_006233196.3	0	sense	genic	exonic	overlapping	Sort1	GeneID:83576,Genbank:XM_006233196.3,RGD:619999	sortilin 1, transcript variant X3	GO:0005905,GO:0006886,GO:0006895,GO:0006897,GO:0007186,GO:0007218,GO:0007275,GO:0030140,GO:0008333,GO:0030379,GO:0008625,GO:0030425,GO:0009986,GO:0030659,GO:0031410,GO:0031965,GO:0032509,GO:0032580,GO:0032868,GO:0038180,GO:0001503,GO:0005765,GO:0005769,GO:0005789,GO:0005794,GO:0005829,GO:0005886,GO:0010008,GO:0010465,GO:0010468,GO:0014902,GO:0016021,GO:0016050,GO:0043025,GO:0016492,GO:0043231,GO:…	clathrin-coated pit|intracellular protein transport|Golgi to endosome transport|endocytosis|G-protein coupled receptor signaling pathway|neuropeptide signaling pathway|multicellular organism development|trans-Golgi network transport vesicle|endosome to lysosome transport|neurotensin receptor activity, non-G-protein coupled|extrinsic apoptotic signaling pathway via death domain receptors|dendrite|…	rno04142,rno04979,rno04722	Lysosome|Cholesterol metabolism|Neurotrophin signaling pathway
NONRATT015732.2	Inf	Inf	1.96721e-15	Up	Chr2	220338959	220340234	+	NM_001001508.2	0	sense	genic	exonic	nested	Plppr4	GeneID:295401,Genbank:NM_001001508.2,RGD:727806	phospholipid phosphatase related 4	GO:0046839,GO:0006644,GO:0048839,GO:0007165,GO:0007409,GO:0008195,GO:0009897,GO:0016791,GO:0042577,GO:0005887	phospholipid dephosphorylation|phospholipid metabolic process|inner ear development|signal transduction|axonogenesis|phosphatidate phosphatase activity|external side of plasma membrane|phosphatase activity|lipid phosphatase activity|integral component of plasma membrane
NONRATT015733.2	2.49385	1.31837	0.00224912	Up	Chr2	220340424	220341858	+	NM_001001508.2	0	sense	genic	exonic	nested	Plppr4	GeneID:295401,Genbank:NM_001001508.2,RGD:727806	phospholipid phosphatase related 4	GO:0046839,GO:0006644,GO:0048839,GO:0007165,GO:0007409,GO:0008195,GO:0009897,GO:0016791,GO:0042577,GO:0005887	phospholipid dephosphorylation|phospholipid metabolic process|inner ear development|signal transduction|axonogenesis|phosphatidate phosphatase activity|external side of plasma membrane|phosphatase activity|lipid phosphatase activity|integral component of plasma membrane
NONRATT015789.2	13.6309	3.76881	6.78945e-05	Up	Chr2	240626215	240654891	+	NM_031237.1	0	sense	genic	exonic	overlapping	Ube2d3	GeneID:81920,Genbank:NM_031237.1,RGD:619912	ubiquitin-conjugating enzyme E2D 3	GO:0061631,GO:0004842,GO:0070936,GO:0005524,GO:0005886,GO:0006281,GO:0006511,GO:0006513,GO:0070979,GO:0006915,GO:0010008,GO:1903955,GO:0016567,GO:0043161,GO:0000209,GO:0051865	ubiquitin conjugating enzyme activity|ubiquitin-protein transferase activity|protein K48-linked ubiquitination|ATP binding|plasma membrane|DNA repair|ubiquitin-dependent protein catabolic process|protein monoubiquitination|protein K11-linked ubiquitination|apoptotic process|endosome membrane|positive regulation of protein targeting to mitochondrion|protein ubiquitination|proteasome-mediated ubiqu…	rno04141,rno04120	Protein processing in endoplasmic reticulum|Ubiquitin mediated proteolysis
NONRATT015790.2	2.38228	1.25234	0.00346313	Up	Chr2	240626380	240654728	+	XM_006233334.2	0	sense	genic	exonic	nested	Ube2d3	GeneID:81920,Genbank:XM_006233334.2,RGD:619912	ubiquitin-conjugating enzyme E2D 3, transcript variant X2	GO:0061631,GO:0004842,GO:0070936,GO:0005524,GO:0005886,GO:0006281,GO:0006511,GO:0006513,GO:0070979,GO:0006915,GO:0010008,GO:1903955,GO:0016567,GO:0043161,GO:0000209,GO:0051865	ubiquitin conjugating enzyme activity|ubiquitin-protein transferase activity|protein K48-linked ubiquitination|ATP binding|plasma membrane|DNA repair|ubiquitin-dependent protein catabolic process|protein monoubiquitination|protein K11-linked ubiquitination|apoptotic process|endosome membrane|positive regulation of protein targeting to mitochondrion|protein ubiquitination|proteasome-mediated ubiqu…	rno04141,rno04120	Protein processing in endoplasmic reticulum|Ubiquitin mediated proteolysis
NONRATT015791.2	0.217644	-2.19996	0.0354293	Down	Chr2	240626552	240654450	+	XM_006233334.2	0	sense	genic	exonic	nested	Ube2d3	GeneID:81920,Genbank:XM_006233334.2,RGD:619912	ubiquitin-conjugating enzyme E2D 3, transcript variant X2	GO:0061631,GO:0004842,GO:0070936,GO:0005524,GO:0005886,GO:0006281,GO:0006511,GO:0006513,GO:0070979,GO:0006915,GO:0010008,GO:1903955,GO:0016567,GO:0043161,GO:0000209,GO:0051865	ubiquitin conjugating enzyme activity|ubiquitin-protein transferase activity|protein K48-linked ubiquitination|ATP binding|plasma membrane|DNA repair|ubiquitin-dependent protein catabolic process|protein monoubiquitination|protein K11-linked ubiquitination|apoptotic process|endosome membrane|positive regulation of protein targeting to mitochondrion|protein ubiquitination|proteasome-mediated ubiqu…	rno04141,rno04120	Protein processing in endoplasmic reticulum|Ubiquitin mediated proteolysis
NONRATT015794.2	9.22917	3.2062	0.00593616	Up	Chr2	240648107	240654800	+	NM_031237.1	0	sense	genic	exonic	nested	Ube2d3	GeneID:81920,Genbank:NM_031237.1,RGD:619912	ubiquitin-conjugating enzyme E2D 3	GO:0061631,GO:0004842,GO:0070936,GO:0005524,GO:0005886,GO:0006281,GO:0006511,GO:0006513,GO:0070979,GO:0006915,GO:0010008,GO:1903955,GO:0016567,GO:0043161,GO:0000209,GO:0051865	ubiquitin conjugating enzyme activity|ubiquitin-protein transferase activity|protein K48-linked ubiquitination|ATP binding|plasma membrane|DNA repair|ubiquitin-dependent protein catabolic process|protein monoubiquitination|protein K11-linked ubiquitination|apoptotic process|endosome membrane|positive regulation of protein targeting to mitochondrion|protein ubiquitination|proteasome-mediated ubiqu…	rno04141,rno04120	Protein processing in endoplasmic reticulum|Ubiquitin mediated proteolysis
NONRATT015805.2	0.122574	-3.02828	0.0256455	Down	Chr2	242885135	242886046	+	XM_002729121.5	48	sense	intergenic	downstream	same_strand	Ddit4l	GeneID:100363484,Genbank:XM_002729121.5,RGD:2322961	DNA-damage-inducible transcript 4-like	GO:0005737,GO:0009968	cytoplasm|negative regulation of signal transduction
NONRATT015836.2	2.7032	1.43467	0.00436825	Up	Chr2	250601083	250633551	+	NM_133297.2	0	sense	genic	exonic	nested	2019-09-15	GeneID:113922,Genbank:NM_133297.2,RGD:621291	selenoprotein 15	GO:0008379,GO:0008430,GO:0035092,GO:0051084,GO:0098869,GO:0005515,GO:0005788	thioredoxin peroxidase activity|selenium binding|sperm chromatin condensation|'de novo' posttranslational protein folding|cellular oxidant detoxification|protein binding|endoplasmic reticulum lumen
NONRATT015855.2	3.2549	1.70261	0.000999245	Up	Chr2	251763185	251766013	+	XM_017591068.1	0	sense	genic	exonic	overlapping	Ddah1	GeneID:64157,Genbank:XM_017591068.1,RGD:70968	dimethylarginine dimethylaminohydrolase 1, transcript variant X1	GO:0043116,GO:0003073,GO:0045429,GO:0006525,GO:0006527,GO:0008285,GO:0016403,GO:0045766,GO:0046872,GO:1900038,GO:0016597,GO:0000052,GO:0016813	negative regulation of vascular permeability|regulation of systemic arterial blood pressure|positive regulation of nitric oxide biosynthetic process|arginine metabolic process|arginine catabolic process|negative regulation of cell proliferation|dimethylargininase activity|positive regulation of angiogenesis|metal ion binding|negative regulation of cellular response to hypoxia|amino acid binding|c…
NONRATT015918.2	0	-Inf	0.00266305	Down
NONRATT015952.2	5.83848	2.54559	0.0416343	Up	Chr2	18491397	18492473	-	NM_053663.1	0	sense	genic	exonic	nested	Vcan	GeneID:114122,Genbank:NM_053663.1,RGD:619940	versican, transcript variant 2	GO:0009986,GO:0005509,GO:0019903,GO:0005540,GO:0030169,GO:0005576,GO:0005578,GO:0005615,GO:0030246,GO:0031012,GO:0007155,GO:0007417,GO:0007507,GO:0001501,GO:0008347,GO:0001657,GO:0031103,GO:0009611,GO:0005201	cell surface|calcium ion binding|protein phosphatase binding|hyaluronic acid binding|low-density lipoprotein particle binding|extracellular region|proteinaceous extracellular matrix|extracellular space|carbohydrate binding|extracellular matrix|cell adhesion|central nervous system development|heart development|skeletal system development|glial cell migration|ureteric bud development|axon regenerat…	rno04514	Cell adhesion molecules (CAMs)
NONRATT015962.2	0.355857	-1.49063	0.00189486	Down	Chr2	21457045	21457893	-	NM_053721.1	2148	sense	intergenic	downstream	same_strand	Rasgrf2	GeneID:114513,Genbank:NM_053721.1,RGD:69413	RAS protein-specific guanine nucleotide-releasing factor 2	GO:0005516,GO:0005575,GO:0005783,GO:0005789,GO:0005886,GO:0007264,GO:0008150,GO:0034976,GO:0035023,GO:0060291,GO:2000310,GO:0005088,GO:0005089,GO:0005515	calmodulin binding|cellular_component|endoplasmic reticulum|endoplasmic reticulum membrane|plasma membrane|small GTPase mediated signal transduction|biological_process|response to endoplasmic reticulum stress|regulation of Rho protein signal transduction|long-term synaptic potentiation|regulation of NMDA receptor activity|Ras guanyl-nucleotide exchange factor activity|Rho guanyl-nucleotide exchan…	rno04014,rno04010	Ras signaling pathway|MAPK signaling pathway
NONRATT015999.2	3.23206	1.69245	0.0295298	Up	Chr2	27983925	27988171	-	XM_017590700.1	0	antisense	genic	exonic	overlapping	Gfm2	GeneID:294672,Genbank:XM_017590700.1,RGD:1309854	G elongation factor, mitochondrial 2, transcript variant X3	GO:0003924,GO:0005525,GO:0005739,GO:0032543,GO:0032790,GO:0003746,GO:0070125	GTPase activity|GTP binding|mitochondrion|mitochondrial translation|ribosome disassembly|translation elongation factor activity|mitochondrial translational elongation
NONRATT016140.2	3.09009	1.62765	0.00145467	Up	Chr2	47120339	47123004	-	NM_030994.2	4399	sense	intergenic	downstream	same_strand	Itga1	GeneID:25118,Genbank:NM_030994.2,RGD:2923	integrin subunit alpha 1	GO:0045121,GO:0032516,GO:0005518,GO:0045123,GO:0005925,GO:0045178,GO:0034665,GO:0007155,GO:0046872,GO:0007160,GO:0007229,GO:0008285,GO:0042059,GO:0009897,GO:0048812,GO:0060326,GO:0042311,GO:0009986,GO:0098639,GO:0043005,GO:0016020,GO:0000187,GO:0043204,GO:0019903,GO:0001669,GO:0043525,GO:0030593,GO:0005102	membrane raft|positive regulation of phosphoprotein phosphatase activity|collagen binding|cellular extravasation|focal adhesion|basal part of cell|integrin alpha1-beta1 complex|cell adhesion|metal ion binding|cell-matrix adhesion|integrin-mediated signaling pathway|negative regulation of cell proliferation|negative regulation of epidermal growth factor receptor signaling pathway|external side of …	rno04151,rno04512,rno04510,rno04810,rno04640,rno05410,rno05412,rno05414,rno05165	PI3K-Akt signaling pathway|ECM-receptor interaction|Focal adhesion|Regulation of actin cytoskeleton|Hematopoietic cell lineage|Hypertrophic cardiomyopathy (HCM)|Arrhythmogenic right ventricular cardiomyopathy (ARVC)|Dilated cardiomyopathy (DCM)|Human papillomavirus infection
NONRATT016141.2	2.65867	1.4107	0.00406497	Up	Chr2	47123672	47125905	-	NM_030994.2	1498	sense	intergenic	downstream	same_strand	Itga1	GeneID:25118,Genbank:NM_030994.2,RGD:2923	integrin subunit alpha 1	GO:0045121,GO:0032516,GO:0005518,GO:0045123,GO:0005925,GO:0045178,GO:0034665,GO:0007155,GO:0046872,GO:0007160,GO:0007229,GO:0008285,GO:0042059,GO:0009897,GO:0048812,GO:0060326,GO:0042311,GO:0009986,GO:0098639,GO:0043005,GO:0016020,GO:0000187,GO:0043204,GO:0019903,GO:0001669,GO:0043525,GO:0030593,GO:0005102	membrane raft|positive regulation of phosphoprotein phosphatase activity|collagen binding|cellular extravasation|focal adhesion|basal part of cell|integrin alpha1-beta1 complex|cell adhesion|metal ion binding|cell-matrix adhesion|integrin-mediated signaling pathway|negative regulation of cell proliferation|negative regulation of epidermal growth factor receptor signaling pathway|external side of …	rno04151,rno04512,rno04510,rno04810,rno04640,rno05410,rno05412,rno05414,rno05165	PI3K-Akt signaling pathway|ECM-receptor interaction|Focal adhesion|Regulation of actin cytoskeleton|Hematopoietic cell lineage|Hypertrophic cardiomyopathy (HCM)|Arrhythmogenic right ventricular cardiomyopathy (ARVC)|Dilated cardiomyopathy (DCM)|Human papillomavirus infection
NONRATT016200.2	2.9929	1.58154	0.00730798	Up	Chr2	78848013	78848267	-	NM_001101828.1	0	antisense	genic	intronic	nested	2019-03-11	GeneID:499558,Genbank:NM_001101828.1,RGD:1559945	membrane associated ring-CH-type finger 11	GO:0016740,GO:0030659,GO:0008270,GO:0016021,GO:0016567	transferase activity|cytoplasmic vesicle membrane|zinc ion binding|integral component of membrane|protein ubiquitination
NONRATT016266.2	Inf	Inf	0.0414717	Up	Chr2	104045263	104047593	-	XM_006232188.3	0	sense	genic	exonic	nested	Pde7a	GeneID:81744,Genbank:XM_006232188.3,RGD:68391	phosphodiesterase 7A, transcript variant X1	GO:0004115,GO:0006198,GO:0007165,GO:0019933,GO:0046872,GO:0004112,GO:0004114	3',5'-cyclic-AMP phosphodiesterase activity|cAMP catabolic process|signal transduction|cAMP-mediated signaling|metal ion binding|cyclic-nucleotide phosphodiesterase activity|3',5'-cyclic-nucleotide phosphodiesterase activity	rno00230,rno05032	Purine metabolism|Morphine addiction
NONRATT016273.2	0.336185	-1.57267	0.00141836	Down
NONRATT016319.2	0.489438	-1.0308	0.0269823	Down	Chr2	119328283	119330274	-	NM_173152.1	56	sense	intergenic	downstream	same_strand	Pex5l	GeneID:286937,Genbank:NM_173152.1,RGD:708407	peroxisomal biogenesis factor 5-like	GO:0098655,GO:0043235,GO:0005052,GO:0005221,GO:0043949,GO:0005737,GO:0005778,GO:0005829,GO:0016560,GO:0017071,GO:0045055,GO:0017137,GO:0045185,GO:0030425,GO:0048471,GO:0031267,GO:0000268,GO:0051286,GO:0051461,GO:0042391	cation transmembrane transport|receptor complex|peroxisome matrix targeting signal-1 binding|intracellular cyclic nucleotide activated cation channel activity|regulation of cAMP-mediated signaling|cytoplasm|peroxisomal membrane|cytosol|protein import into peroxisome matrix, docking|intracellular cyclic nucleotide activated cation channel complex|regulated exocytosis|Rab GTPase binding|maintenance…	rno04146	Peroxisome
NONRATT016327.2	3.20429	1.68	0.000669238	Up	Chr2	120512056	120512637	-	XM_017591238.1	0	sense	genic	exonic	nested	LOC100366044	GeneID:100366044,Genbank:XM_017591238.1,RGD:2324412	rCG41429-like, transcript variant X5
NONRATT016374.2	0.367884	-1.44268	0.00261682	Down	Chr2	140460772	140464559	-	XM_003749275.3	0	sense	genic	exonic	nested	Ndufc1	GeneID:689938,Genbank:XM_003749275.3,RGD:1586362	NADH:ubiquinone oxidoreductase subunit C1, transcript variant X2	GO:0005739,GO:0005747,GO:0032981	mitochondrion|mitochondrial respiratory chain complex I|mitochondrial respiratory chain complex I assembly	rno00190,rno04723,rno04714,rno05010,rno05012,rno05016,rno04932	Oxidative phosphorylation|Retrograde endocannabinoid signaling|Thermogenesis|Alzheimer's disease|Parkinson's disease|Huntington's disease|Non-alcoholic fatty liver disease (NAFLD)
NONRATT016386.2	Inf	Inf	0.010759	Up	Chr2	143892697	143905048	+	XM_008760999.2	0	sense	genic	exonic	overlapping	Supt20h	GeneID:361946,Genbank:XM_008760999.2,RGD:1307812	SPT20 homolog, SAGA complex component, transcript variant X14	GO:0003674,GO:0003712,GO:0005575,GO:0007369,GO:0008150,GO:0035948,GO:0070461,GO:1903506,GO:0000124,GO:0001650	molecular_function|transcription cofactor activity|cellular_component|gastrulation|biological_process|positive regulation of gluconeogenesis by positive regulation of transcription from RNA polymerase II promoter|SAGA-type complex|regulation of nucleic acid-templated transcription|SAGA complex|fibrillar center	rno04140	Autophagy - animal
NONRATT016394.2	Inf	Inf	0.000467178	Up	Chr2	142672188	142674981	-	XM_017591256.1	0	sense	genic	exonic	nested	Nhlrc3	GeneID:310416,Genbank:XM_017591256.1,RGD:1565414	NHL repeat containing 3, transcript variant X2	GO:0000209,GO:0043161,GO:0061630	protein polyubiquitination|proteasome-mediated ubiquitin-dependent protein catabolic process|ubiquitin protein ligase activity
NONRATT016414.2	2.24489	1.16664	0.0062271	Up	Chr2	147574093	147576787	-	NM_001024869.1	362	sense	intergenic	downstream	same_strand	Wwtr1	GeneID:295062,Genbank:NM_001024869.1,RGD:1559609	WW domain containing transcription regulator 1	GO:0045599,GO:0016567,GO:0003713,GO:0045944,GO:0016604,GO:0003714,GO:0048762,GO:0005634,GO:0060271,GO:0005654,GO:0005667,GO:0005737,GO:0017145,GO:0005829,GO:0060390,GO:0031146,GO:0060828,GO:0032835,GO:0006355,GO:0060993,GO:0035264,GO:0006469,GO:0000122,GO:0072307,GO:0035329,GO:0008284,GO:0001649,GO:0090090,GO:0042803,GO:0010718,GO:0001933	negative regulation of fat cell differentiation|protein ubiquitination|transcription coactivator activity|positive regulation of transcription by RNA polymerase II|nuclear body|transcription corepressor activity|mesenchymal cell differentiation|nucleus|cilium assembly|nucleoplasm|transcription factor complex|cytoplasm|stem cell division|cytosol|regulation of SMAD protein signal transduction|SCF-d…	rno04390,rno04392	Hippo signaling pathway|Hippo signaling pathway - multiple species
NONRATT016451.2	2.22181	1.15173	0.0425732	Up	Chr2	157751227	157751952	-	NM_053662.3	0	sense	genic	exonic	nested	Ccnl1	GeneID:114121,Genbank:NM_053662.3,RGD:620864	cyclin L1	GO:0005634,GO:0006351,GO:0006396,GO:0016538,GO:0016607,GO:0045737,GO:0045944,GO:1901409,GO:0000307,GO:0005515	nucleus|transcription, DNA-templated|RNA processing|cyclin-dependent protein serine/threonine kinase regulator activity|nuclear speck|positive regulation of cyclin-dependent protein serine/threonine kinase activity|positive regulation of transcription by RNA polymerase II|positive regulation of phosphorylation of RNA polymerase II C-terminal domain|cyclin-dependent protein kinase holoenzyme compl…
NONRATT016489.2	0.271055	-1.88334	0.0259017	Down	Chr2	178399264	178400000	-	XM_017590759.1	2411	sense	intergenic	downstream	same_strand	Rxfp1	GeneID:295144,Genbank:XM_017590759.1,RGD:1302973	relaxin/insulin-like family peptide receptor 1, transcript variant X2	GO:0030198,GO:0004930,GO:0042562,GO:0005622,GO:0005886,GO:0007188,GO:0007189,GO:0046872,GO:0007567,GO:0060427,GO:0016021,GO:0060658,GO:0030154	extracellular matrix organization|G-protein coupled receptor activity|hormone binding|intracellular|plasma membrane|adenylate cyclase-modulating G-protein coupled receptor signaling pathway|adenylate cyclase-activating G-protein coupled receptor signaling pathway|metal ion binding|parturition|lung connective tissue development|integral component of membrane|nipple morphogenesis|cell differentiati…	rno04080,rno04926	Neuroactive ligand-receptor interaction|Relaxin signaling pathway
NONRATT016492.2	0.471339	-1.08516	0.0207995	Down	Chr2	179587441	179589810	-	NM_017261.2	0	sense	genic	exonic	nested	Gria2	GeneID:29627,Genbank:NM_017261.2,RGD:61862	glutamate ionotropic receptor AMPA type subunit 2, transcript variant 1	GO:0004971,GO:0005234,GO:0005246,GO:0005515,GO:0005783,GO:0005789,GO:0019901,GO:0005887,GO:0030054,GO:0007268,GO:0030165,GO:0030425,GO:0030426,GO:0030672,GO:0036477,GO:0031623,GO:0038023,GO:0032279,GO:0042734,GO:0032281,GO:0042802,GO:0043005,GO:0043025,GO:0043195,GO:0000149,GO:0051966,GO:0043197,GO:0001540,GO:0060079,GO:0043198,GO:0001919,GO:0060992,GO:0043204,GO:0004970,GO:0097060,GO:0098839,GO:…	AMPA glutamate receptor activity|extracellularly glutamate-gated ion channel activity|calcium channel regulator activity|protein binding|endoplasmic reticulum|endoplasmic reticulum membrane|protein kinase binding|integral component of plasma membrane|cell junction|chemical synaptic transmission|PDZ domain binding|dendrite|growth cone|synaptic vesicle membrane|somatodendritic compartment|receptor …	rno04024,rno04080,rno04724,rno04728,rno04720,rno04730,rno04723,rno04713,rno05014,rno05030,rno05031,rno05033	cAMP signaling pathway|Neuroactive ligand-receptor interaction|Glutamatergic synapse|Dopaminergic synapse|Long-term potentiation|Long-term depression|Retrograde endocannabinoid signaling|Circadian entrainment|Amyotrophic lateral sclerosis (ALS)|Cocaine addiction|Amphetamine addiction|Nicotine addiction
NONRATT016512.2	0.150386	-2.73326	0.000672923	Down	Chr2	183213044	183275370	-	NM_001108552.1	0	sense	genic	exonic	overlapping	Trim2	GeneID:361970,Genbank:NM_001108552.1,RGD:1310981	tripartite motif-containing 2	GO:0005622,GO:0005737,GO:0008270,GO:0016567,GO:0043523,GO:0061630,GO:1990830,GO:0004842,GO:0005515	intracellular|cytoplasm|zinc ion binding|protein ubiquitination|regulation of neuron apoptotic process|ubiquitin protein ligase activity|cellular response to leukemia inhibitory factor|ubiquitin-protein transferase activity|protein binding
NONRATT016522.2	0	-Inf	2.36108e-49	Down	Chr2	184230190	184231751	-	XM_002729089.5	0	sense	genic	exonic	nested	Fbxw7	GeneID:100360914,Genbank:XM_002729089.5,RGD:2321145	F-box and WD repeat domain containing 7, transcript variant X1	GO:0005783,GO:0005794,GO:0006355,GO:0006974,GO:0007062,GO:0007219,GO:0016567,GO:0042802,GO:0019005,GO:0043161,GO:0030324,GO:0045741,GO:0030332,GO:0048471,GO:0050816,GO:0050821,GO:0051443,GO:0070374,GO:0090049,GO:0097027,GO:0001570,GO:0003700,GO:0004842,GO:0005634,GO:0005654,GO:0005730,GO:0005737,GO:0005739,GO:0030674,GO:0031146,GO:0031398,GO:0031625,GO:0031648,GO:1901800,GO:0032876,GO:1903026,GO:…	endoplasmic reticulum|Golgi apparatus|regulation of transcription, DNA-templated|cellular response to DNA damage stimulus|sister chromatid cohesion|Notch signaling pathway|protein ubiquitination|identical protein binding|SCF ubiquitin ligase complex|proteasome-mediated ubiquitin-dependent protein catabolic process|lung development|positive regulation of epidermal growth factor-activated receptor …	rno04120	Ubiquitin mediated proteolysis
NONRATT016552.2	0.355235	-1.49316	0.00888017	Down	Chr2	187398012	187401796	-	NM_022285.1	0	sense	genic	exonic	overlapping	Hapln2	GeneID:64057,Genbank:NM_022285.1,RGD:621854	hyaluronan and proteoglycan link protein 2	GO:0005540,GO:0005578,GO:0007155,GO:0007417,GO:0008065,GO:0085029,GO:0001501,GO:0005201	hyaluronic acid binding|proteinaceous extracellular matrix|cell adhesion|central nervous system development|establishment of blood-nerve barrier|extracellular matrix assembly|skeletal system development|extracellular matrix structural constituent
NONRATT016576.2	15.8562	3.98697	0.0393361	Up	Chr2	188112300	188113582	-	XM_006232748.1	0	sense	genic	exonic	nested	Syt11	GeneID:60568,Genbank:XM_006232748.1,RGD:62042	synaptotagmin 11, transcript variant X1	GO:0005886,GO:0005887,GO:0006906,GO:0008021,GO:0009611,GO:0014069,GO:0016079,GO:0043005,GO:0017158,GO:0043195,GO:0043197,GO:0019905,GO:0044297,GO:0045335,GO:0048471,GO:0048487,GO:1905154,GO:0048787,GO:1905171,GO:0048791,GO:1905469,GO:0050765,GO:1990927,GO:0000149,GO:0001778,GO:0001891,GO:0005509,GO:0005544,GO:0005737,GO:0005764,GO:0030054,GO:0030276,GO:0030424,GO:0030672,GO:0031369,GO:0031625,GO:…	plasma membrane|integral component of plasma membrane|vesicle fusion|synaptic vesicle|response to wounding|postsynaptic density|synaptic vesicle exocytosis|neuron projection|regulation of calcium ion-dependent exocytosis|terminal bouton|dendritic spine|syntaxin binding|cell body|phagocytic vesicle|perinuclear region of cytoplasm|beta-tubulin binding|negative regulation of membrane invagination|pr…
NONRATT016595.2	0.0255824	-5.28871	5.50907e-10	Down	Chr2	188661831	188664157	-	XM_008761203.2	0	sense	genic	exonic	nested	Adam15	GeneID:57025,Genbank:XM_008761203.2,RGD:620402	ADAM metallopeptidase domain 15, transcript variant X1	GO:0070528,GO:0030308,GO:0002418,GO:0098609,GO:0030336,GO:0004222,GO:1900121,GO:0030574,GO:0005178,GO:0005615,GO:0005912,GO:0006508,GO:0006915,GO:0042246,GO:0007229,GO:0042995,GO:0008237,GO:0045087,GO:0008584,GO:0046872,GO:0009986,GO:0001525,GO:0060317,GO:0016021,GO:0001669,GO:0070062,GO:0017124,GO:0001953	protein kinase C signaling|negative regulation of cell growth|immune response to tumor cell|cell-cell adhesion|negative regulation of cell migration|metalloendopeptidase activity|negative regulation of receptor binding|collagen catabolic process|integrin binding|extracellular space|adherens junction|proteolysis|apoptotic process|tissue regeneration|integrin-mediated signaling pathway|cell project…
NONRATT016677.2	0.14085	-2.82777	0.0443167	Down	Chr2	198014386	198017094	-	XM_006232990.3	0	sense	genic	exonic	nested	Car14	GeneID:791259,Genbank:XM_006232990.3,RGD:1599277	carbonic anhydrase 14, transcript variant X3	GO:0004089,GO:0016021	carbonate dehydratase activity|integral component of membrane	rno00910	Nitrogen metabolism
NONRATT016715.2	0.115406	-3.11521	0.0374151	Down	Chr2	204003743	204004851	-	NM_012504.1	0	sense	genic	exonic	nested	Atp1a1	GeneID:24211,Genbank:NM_012504.1,RGD:2167	ATPase Na+/K+ transporting subunit alpha 1	GO:0005783,GO:0005794,GO:0005886,GO:0005890,GO:0005901,GO:0016020,GO:0006813,GO:0006814,GO:0016021,GO:0006883,GO:0016311,GO:0016323,GO:0016324,GO:0016791,GO:0036376,GO:0019901,GO:0042383,GO:0019904,GO:0030007,GO:0042493,GO:0043209,GO:0043531,GO:0043548,GO:0002026,GO:0090662,GO:0045121,GO:0002028,GO:1903416,GO:0045822,GO:0005391,GO:0045823,GO:1990239,GO:1990573,GO:0005515,GO:0005524,GO:0005768,GO:…	endoplasmic reticulum|Golgi apparatus|plasma membrane|sodium:potassium-exchanging ATPase complex|caveola|membrane|potassium ion transport|sodium ion transport|integral component of membrane|cellular sodium ion homeostasis|dephosphorylation|basolateral plasma membrane|apical plasma membrane|phosphatase activity|sodium ion export across plasma membrane|protein kinase binding|sarcolemma|protein doma…	rno04024,rno04022,rno04911,rno04918,rno04919,rno04925,rno04260,rno04261,rno04970,rno04971,rno04972,rno04976,rno04973,rno04974,rno04978,rno04960,rno04961,rno04964	cAMP signaling pathway|cGMP - PKG signaling pathway|Insulin secretion|Thyroid hormone synthesis|Thyroid hormone signaling pathway|Aldosterone synthesis and secretion|Cardiac muscle contraction|Adrenergic signaling in cardiomyocytes|Salivary secretion|Gastric acid secretion|Pancreatic secretion|Bile secretion|Carbohydrate digestion and absorption|Protein digestion and absorption|Mineral absorption…
NONRATT016753.2	0.296119	-1.75575	0.0122212	Down	Chr2	209121186	209160826	-	XM_006233117.3	0	sense	genic	exonic	nested	Cept1	GeneID:310773,Genbank:XM_006233117.3,RGD:1359727	choline/ethanolamine phosphotransferase 1, transcript variant X2	GO:0006646,GO:0006656,GO:0006657,GO:0016021,GO:0016780,GO:0031965,GO:0046872,GO:0004142,GO:0004307,GO:0005789	phosphatidylethanolamine biosynthetic process|phosphatidylcholine biosynthetic process|CDP-choline pathway|integral component of membrane|phosphotransferase activity, for other substituted phosphate groups|nuclear membrane|metal ion binding|diacylglycerol cholinephosphotransferase activity|ethanolaminephosphotransferase activity|endoplasmic reticulum membrane	rno00564,rno00565,rno00440	Glycerophospholipid metabolism|Ether lipid metabolism|Phosphonate and phosphinate metabolism
NONRATT016798.2	Inf	Inf	5.27687e-05	Up	Chr2	211762480	211764514	-	NM_001163568.2	0	sense	genic	exonic	nested	Fam102b	GeneID:365903,Genbank:NM_001163568.2,RGD:1310037	family with sequence similarity 102, member B
NONRATT016816.2	9.83635	3.29812	0.0130303	Up	Chr2	220945866	220946453	-	XM_006233234.3	68849	sense	intergenic	downstream	same_strand	Snx7	GeneID:310815,Genbank:XM_006233234.3,RGD:1305480	sorting nexin 7, transcript variant X1	GO:0019898,GO:0035091,GO:0005768,GO:0006897,GO:0016050	extrinsic component of membrane|phosphatidylinositol binding|endosome|endocytosis|vesicle organization
NONRATT016973.2	2.23319	1.1591	0.0208241	Up	Chr2	260111542	260113171	-	NM_138708.2	0	sense	genic	exonic	nested	Rabggtb	GeneID:25533,Genbank:NM_138708.2,RGD:3530	Rab geranylgeranyltransferase, beta subunit	GO:0004663,GO:0005515,GO:0005968,GO:0008270,GO:0017137,GO:0018342,GO:0018344,GO:0019840,GO:0004659,GO:0046982,GO:0065003	Rab geranylgeranyltransferase activity|protein binding|Rab-protein geranylgeranyltransferase complex|zinc ion binding|Rab GTPase binding|protein prenylation|protein geranylgeranylation|isoprenoid binding|prenyltransferase activity|protein heterodimerization activity|protein-containing complex assembly
NONRATT016979.2	19.9516	4.31843	0.0104203	Up	Chr2	260861827	260874267	-	XM_575065.6	0	sense	genic	exonic	nested	Tyw3	GeneID:499731,Genbank:XM_575065.6,RGD:1559623	tRNA-yW synthesizing protein 3 homolog, transcript variant X1
NONRATT017117.2	Inf	Inf	8.41067e-05	Up	Chr20	5048782	5050863	+	XM_008772715.2	0	sense	genic	exonic	overlapping	Ddah2	GeneID:294239,Genbank:XM_008772715.2,RGD:1302955	dimethylarginine dimethylaminohydrolase 2, transcript variant X1	GO:0016597,GO:0005739,GO:0016813,GO:0005815,GO:0045429,GO:0005829,GO:0006525,GO:0006527,GO:0016403,GO:0000052	amino acid binding|mitochondrion|hydrolase activity, acting on carbon-nitrogen (but not peptide) bonds, in linear amidines|microtubule organizing center|positive regulation of nitric oxide biosynthetic process|cytosol|arginine metabolic process|arginine catabolic process|dimethylargininase activity|citrulline metabolic process
NONRATT017137.2	0.00987875	-6.66146	0.00620425	Down	Chr20	5354223	5418017	+	XM_006256099.3	0	sense	genic	exonic	containing	RT1-A1	GeneID:24973,Genbank:XM_006256099.3,RGD:1595924	RT1 class Ia, locus A1, transcript variant X1	GO:0002517,GO:0002657,GO:0005102,GO:0005515,GO:0005886,GO:0006955,GO:0016021,GO:0030881,GO:0042277,GO:0042605,GO:0042612,GO:0001916,GO:0045953,GO:0002474,GO:0046982	T cell tolerance induction|positive regulation of tolerance induction to nonself antigen|signaling receptor binding|protein binding|plasma membrane|immune response|integral component of membrane|beta-2-microglobulin binding|peptide binding|peptide antigen binding|MHC class I protein complex|positive regulation of T cell mediated cytotoxicity|negative regulation of natural killer cell mediated cyt…	rno04514,rno04144,rno04145,rno04218,rno04650,rno04612,rno05203,rno05320,rno05330,rno05332,rno05416,rno04940,rno05166,rno05168,rno05167,rno05169,rno05165	Cell adhesion molecules (CAMs)|Endocytosis|Phagosome|Cellular senescence|Natural killer cell mediated cytotoxicity|Antigen processing and presentation|Viral carcinogenesis|Autoimmune thyroid disease|Allograft rejection|Graft-versus-host disease|Viral myocarditis|Type I diabetes mellitus|HTLV-I infection|Herpes simplex infection|Kaposi's sarcoma-associated herpesvirus infection|Epstein-Barr virus …
NONRATT017140.2	24.0065	4.58535	1.74146e-05	Up	Chr20	5376994	5377610	+	NM_001008829.1	0	sense	genic	exonic	nested	RT1-A2	GeneID:24974,Genbank:NM_001008829.1,RGD:1595923	RT1 class Ia, locus A2	GO:0005102,GO:0005515,GO:0005886,GO:0006955,GO:0009897,GO:0010977,GO:0016021,GO:0042605,GO:0042612,GO:0045121,GO:0001916,GO:0002474,GO:0002485	signaling receptor binding|protein binding|plasma membrane|immune response|external side of plasma membrane|negative regulation of neuron projection development|integral component of membrane|peptide antigen binding|MHC class I protein complex|membrane raft|positive regulation of T cell mediated cytotoxicity|antigen processing and presentation of peptide antigen via MHC class I|antigen processing…	rno04514,rno04144,rno04145,rno04218,rno04650,rno04612,rno05203,rno05320,rno05330,rno05332,rno05416,rno04940,rno05166,rno05168,rno05167,rno05169,rno05165	Cell adhesion molecules (CAMs)|Endocytosis|Phagosome|Cellular senescence|Natural killer cell mediated cytotoxicity|Antigen processing and presentation|Viral carcinogenesis|Autoimmune thyroid disease|Allograft rejection|Graft-versus-host disease|Viral myocarditis|Type I diabetes mellitus|HTLV-I infection|Herpes simplex infection|Kaposi's sarcoma-associated herpesvirus infection|Epstein-Barr virus …
NONRATT017170.2	2.62193	1.39063	0.0193704	Up	Chr20	6295089	6295971	+	NM_001047907.3	0	sense	genic	exonic	nested	Srsf3	GeneID:361814,Genbank:NM_001047907.3,RGD:1309233	serine and arginine rich splicing factor 3	GO:0016607,GO:0043274,GO:0048024,GO:1990825,GO:1990830,GO:0003723,GO:0005634,GO:0008150	nuclear speck|phospholipase binding|regulation of mRNA splicing, via spliceosome|sequence-specific mRNA binding|cellular response to leukemia inhibitory factor|RNA binding|nucleus|biological_process	rno03040,rno05168	Spliceosome|Herpes simplex infection
NONRATT017173.2	4.88887	2.2895	0.0051647	Up	Chr20	6508398	6508902	+	NM_001034188.1	6736	antisense	intergenic	downstream	convergent	Ppil1	GeneID:309651,Genbank:NM_001034188.1,RGD:1309119	peptidylprolyl isomerase like 1	GO:0000413,GO:0003674,GO:0003755,GO:0005575,GO:0005634,GO:0006457,GO:0008150,GO:0071007,GO:0071013,GO:0000398,GO:0097718	protein peptidyl-prolyl isomerization|molecular_function|peptidyl-prolyl cis-trans isomerase activity|cellular_component|nucleus|protein folding|biological_process|U2-type catalytic step 2 spliceosome|catalytic step 2 spliceosome|mRNA splicing, via spliceosome|disordered domain specific binding	rno03040	Spliceosome
NONRATT017179.2	16.2084	4.01867	0.0358741	Up	Chr20	6877094	6903854	+	NM_199379.2	0	sense	genic	exonic	overlapping	RGD735065	GeneID:294311,Genbank:NM_199379.2,RGD:735065	similar to GI:13385412-like protein splice form I	GO:1901727,GO:0005737,GO:0005886,GO:0016021,GO:0030496,GO:0042060,GO:0045787,GO:0000139,GO:0050673,GO:0005730	positive regulation of histone deacetylase activity|cytoplasm|plasma membrane|integral component of membrane|midbody|wound healing|positive regulation of cell cycle|Golgi membrane|epithelial cell proliferation|nucleolus
NONRATT017194.2	5.35068	2.41972	0.00311972	Up	Chr20	7133099	7140154	+	XM_006256164.2	0	sense	genic	exonic	overlapping	Hmga1	GeneID:117062,Genbank:XM_006256164.2,RGD:628699	high mobility group AT-hook 1, transcript variant X7	GO:0005634,GO:0006284,GO:0006355,GO:0006366,GO:0007283,GO:0042974,GO:0008134,GO:0042975,GO:0008285,GO:0045892,GO:0045893,GO:0045944,GO:0046965,GO:0001077,GO:0001158,GO:0001205,GO:0003680,GO:0003682,GO:0003700,GO:0003906,GO:0009615,GO:0019899,GO:0030374,GO:0035985,GO:0051575,GO:0035986,GO:0090402,GO:0090575,GO:2000774	nucleus|base-excision repair|regulation of transcription, DNA-templated|transcription by RNA polymerase II|spermatogenesis|retinoic acid receptor binding|transcription factor binding|peroxisome proliferator activated receptor binding|negative regulation of cell proliferation|negative regulation of transcription, DNA-templated|positive regulation of transcription, DNA-templated|positive regulation…
NONRATT017220.2	2.4774	1.30882	0.00744318	Up	Chr20	8169556	8170033	+	NM_017034.1	0	sense	genic	exonic	overlapping	Pim1	GeneID:24649,Genbank:NM_017034.1,RGD:3330	Pim-1 proto-oncogene, serine/threonine kinase	GO:0060045,GO:0043024,GO:0006915,GO:0005524,GO:0070561,GO:0043066,GO:0007346,GO:1902033,GO:0008134,GO:0005634,GO:1905062,GO:0005730,GO:0005737,GO:0008283,GO:0043433,GO:0005829,GO:0045893,GO:0030145,GO:0046777,GO:0005886,GO:0004674,GO:0030212,GO:0006468,GO:0050821,GO:0031659	positive regulation of cardiac muscle cell proliferation|ribosomal small subunit binding|apoptotic process|ATP binding|vitamin D receptor signaling pathway|negative regulation of apoptotic process|regulation of mitotic cell cycle|regulation of hematopoietic stem cell proliferation|transcription factor binding|nucleus|positive regulation of cardioblast proliferation|nucleolus|cytoplasm|cell prolif…	rno04630,rno05200,rno05206,rno05221,rno04933	Jak-STAT signaling pathway|Pathways in cancer|MicroRNAs in cancer|Acute myeloid leukemia|AGE-RAGE signaling pathway in diabetic complications
NONRATT017279.2	2.56269	1.35766	0.0280209	Up	Chr20	11972380	12062068	+	XM_017601551.1	0	sense	genic	exonic	nested	Adarb1	GeneID:25367,Genbank:XM_017601551.1,RGD:2033	adenosine deaminase, RNA-specific, B1, transcript variant X3	GO:0003726,GO:0004000,GO:0005515,GO:0005634,GO:0005654,GO:0007274,GO:0005730,GO:0007420,GO:0008285,GO:0016553,GO:0044387,GO:0016556,GO:0021610,GO:0045070,GO:0046872,GO:0003723,GO:0097049,GO:0050685,GO:0050884,GO:0003725,GO:0005829,GO:0006382,GO:0006396,GO:0021618,GO:0021965,GO:0006397,GO:0030336,GO:0051726,GO:0035264,GO:0042803,GO:0060384,GO:0060415,GO:0061744	double-stranded RNA adenosine deaminase activity|adenosine deaminase activity|protein binding|nucleus|nucleoplasm|neuromuscular synaptic transmission|nucleolus|brain development|negative regulation of cell proliferation|base conversion or substitution editing|negative regulation of protein kinase activity by regulation of protein phosphorylation|mRNA modification|facial nerve morphogenesis|positi…
NONRATT017301.2	0.270966	-1.88382	0.0291184	Down	Chr20	13741349	13746366	+	XM_017601782.1	8370	sense	intergenic	downstream	same_strand	Mif	GeneID:81683,Genbank:XM_017601782.1,RGD:621163	macrophage migration inhibitory factor (glycosylation-inhibiting factor), transcript variant X1	GO:0005102,GO:0005125,GO:0005126,GO:0005576,GO:0005615,GO:0005634,GO:0009986,GO:0005654,GO:0010035,GO:0005737,GO:0010469,GO:0005829,GO:0010629,GO:0010739,GO:0010760,GO:0014911,GO:0033197,GO:0019752,GO:0042056,GO:0030330,GO:0042060,GO:0030890,GO:0042127,GO:0042327,GO:0042493,GO:0042756,GO:0001516,GO:0050178,GO:0042802,GO:0001934,GO:0050715,GO:0043066,GO:0001942,GO:0050731,GO:0043209,GO:0002020,GO:…	signaling receptor binding|cytokine activity|cytokine receptor binding|extracellular region|extracellular space|nucleus|cell surface|nucleoplasm|response to inorganic substance|cytoplasm|regulation of signaling receptor activity|cytosol|negative regulation of gene expression|positive regulation of protein kinase A signaling|negative regulation of macrophage chemotaxis|positive regulation of smoot…	rno00350,rno00360	Tyrosine metabolism|Phenylalanine metabolism
NONRATT017309.2	0.464739	-1.10551	0.013049	Down	Chr20	13829726	13831971	+	NM_024131.1	103	sense	intergenic	downstream	same_strand	Ddt	GeneID:29318,Genbank:NM_024131.1,RGD:61923	D-dopachrome tautomerase	GO:0005615,GO:0005737,GO:0006954,GO:0010760,GO:0032760,GO:0033981,GO:0042438,GO:0050178,GO:0050729,GO:0070374,GO:0002020,GO:0004167,GO:0005126	extracellular space|cytoplasm|inflammatory response|negative regulation of macrophage chemotaxis|positive regulation of tumor necrosis factor production|D-dopachrome decarboxylase activity|melanin biosynthetic process|phenylpyruvate tautomerase activity|positive regulation of inflammatory response|positive regulation of ERK1 and ERK2 cascade|protease binding|dopachrome isomerase activity|cytokine…
NONRATT017355.2	67.2992	6.07252	0.00138769	Up	Chr20	23080017	23080999	+	XM_017601619.1	81033	sense	intergenic	downstream	same_strand	Reep3	GeneID:294375,Genbank:XM_017601619.1,RGD:1560401	receptor accessory protein 3, transcript variant X1	GO:0006998,GO:0007084,GO:0016021	nuclear envelope organization|mitotic nuclear envelope reassembly|integral component of membrane
NONRATT017367.2	2.78266	1.47646	0.000591826	Up	Chr20	28002027	28004766	+	XM_006256391.3	0	sense	genic	exonic	nested	Lims1	GeneID:499443,Genbank:XM_006256391.3,RGD:1560732	LIM zinc finger domain containing 1, transcript variant X9	GO:0051894,GO:0043547,GO:0005925,GO:0071560,GO:0045184,GO:0098609,GO:0045216,GO:0007160,GO:1900026,GO:0007163,GO:0008270,GO:0010628,GO:0010811,GO:0045892,GO:0019901,GO:1901224,GO:0048471,GO:0019904,GO:2000178,GO:0050678,GO:0032991,GO:2000346,GO:0050680,GO:0033209,GO:0001837,GO:2001046,GO:0051291,GO:0043009,GO:0005886,GO:0043066,GO:0005911	positive regulation of focal adhesion assembly|positive regulation of GTPase activity|focal adhesion|cellular response to transforming growth factor beta stimulus|establishment of protein localization|cell-cell adhesion|cell-cell junction organization|cell-matrix adhesion|positive regulation of substrate adhesion-dependent cell spreading|establishment or maintenance of cell polarity|zinc ion bind…
NONRATT017457.2	0.052947	-4.23931	0.0176007	Down	Chr20	48335632	48340842	+	NM_012752.3	0	sense	genic	exonic	nested	Cd24	GeneID:25145,Genbank:NM_012752.3,RGD:2298	CD24 molecule	GO:0098609,GO:0106015,GO:0106016,GO:0002523,GO:0002842,GO:2000768,GO:0002863,GO:0002904,GO:0005886,GO:0006955,GO:0007155,GO:0009986,GO:0007157,GO:0010976,GO:0007159,GO:0016020,GO:0007166,GO:0016477,GO:0019901,GO:0031362,GO:0022407,GO:0022409,GO:0031528,GO:0032597,GO:0032600,GO:0001666,GO:0034119,GO:0042103,GO:0032715,GO:0001775,GO:0042104,GO:0001959,GO:0042325,GO:0002237,GO:0042632,GO:0045730,GO:…	cell-cell adhesion|negative regulation of inflammatory response to wounding|positive regulation of inflammatory response to wounding|leukocyte migration involved in inflammatory response|positive regulation of T cell mediated immune response to tumor cell|positive regulation of nephron tubule epithelial cell differentiation|positive regulation of inflammatory response to antigenic stimulus|positi…	rno04640	Hematopoietic cell lineage
NONRATT017477.2	6.17053	2.62539	0.0437978	Up	Chr20	55253673	55275398	+	XM_006256602.3	0	sense	genic	exonic	nested	Ascc3	GeneID:309887,Genbank:XM_006256602.3,RGD:1307995	activating signal cointegrator 1 complex subunit 3, transcript variant X1	GO:0032508,GO:0005634,GO:0005829,GO:0006307,GO:0043140,GO:0006351,GO:0006355,GO:0099053,GO:0008283,GO:0003676,GO:0005524,GO:0005622	DNA duplex unwinding|nucleus|cytosol|DNA dealkylation involved in DNA repair|ATP-dependent 3'-5' DNA helicase activity|transcription, DNA-templated|regulation of transcription, DNA-templated|activating signal cointegrator 1 complex|cell proliferation|nucleic acid binding|ATP binding|intracellular
NONRATT017508.2	0.128326	-2.96211	0.0361769	Down	Chr20	3209687	3211829	-	NM_001008826.3	12231	antisense	intergenic	downstream	convergent	RT1-T24-4	GeneID:414784,Genbank:NM_001008826.3,RGD:1598233	RT1 class I, locus T24, gene 4	GO:0006955,GO:0016021,GO:0042605,GO:0042612,GO:0002474,GO:0005102,GO:0005886	immune response|integral component of membrane|peptide antigen binding|MHC class I protein complex|antigen processing and presentation of peptide antigen via MHC class I|signaling receptor binding|plasma membrane	rno04514,rno04144,rno04145,rno04218,rno04650,rno04612,rno05203,rno05320,rno05330,rno05332,rno05416,rno04940,rno05166,rno05168,rno05167,rno05169,rno05165	Cell adhesion molecules (CAMs)|Endocytosis|Phagosome|Cellular senescence|Natural killer cell mediated cytotoxicity|Antigen processing and presentation|Viral carcinogenesis|Autoimmune thyroid disease|Allograft rejection|Graft-versus-host disease|Viral myocarditis|Type I diabetes mellitus|HTLV-I infection|Herpes simplex infection|Kaposi's sarcoma-associated herpesvirus infection|Epstein-Barr virus …
NONRATT017527.2	0.321432	-1.63741	0.0450688	Down	Chr20	3437559	3438038	-	XM_006256024.3	0	sense	genic	exonic	nested	Flot1	GeneID:64665,Genbank:XM_006256024.3,RGD:70991	flotillin 1, transcript variant X1	GO:0005768,GO:0005769,GO:0005815,GO:0005886,GO:0005901,GO:0005911,GO:0032226,GO:0005913,GO:0032728,GO:0007409,GO:0033227,GO:0008180,GO:0034116,GO:0034141,GO:0034143,GO:0034451,GO:0051260,GO:0034976,GO:0060355,GO:0035023,GO:0070528,GO:0035255,GO:0071360,GO:0072659,GO:1901741,GO:1901890,GO:0001765,GO:1903044,GO:0001819,GO:2000049,GO:0001931,GO:0001934,GO:0002020,GO:0002090,GO:0005515,GO:0016020,GO:…	endosome|early endosome|microtubule organizing center|plasma membrane|caveola|cell-cell junction|positive regulation of synaptic transmission, dopaminergic|cell-cell adherens junction|positive regulation of interferon-beta production|axonogenesis|dsRNA transport|COP9 signalosome|positive regulation of heterotypic cell-cell adhesion|positive regulation of toll-like receptor 3 signaling pathway|reg…	rno04910	Insulin signaling pathway
NONRATT017552.2	0.0384171	-4.70211	0.0082474	Down	Chr20	4676850	4677801	-	NM_001008845.1	17964	sense	intergenic	downstream	same_strand	RT1-CE7	GeneID:368153,Genbank:NM_001008845.1,RGD:1595786	RT1 class I, locus CE7	GO:0016021	integral component of membrane	rno04514,rno04144,rno04145,rno04218,rno04650,rno04612,rno05203,rno05320,rno05330,rno05332,rno05416,rno04940,rno05166,rno05168,rno05167,rno05169,rno05165	Cell adhesion molecules (CAMs)|Endocytosis|Phagosome|Cellular senescence|Natural killer cell mediated cytotoxicity|Antigen processing and presentation|Viral carcinogenesis|Autoimmune thyroid disease|Allograft rejection|Graft-versus-host disease|Viral myocarditis|Type I diabetes mellitus|HTLV-I infection|Herpes simplex infection|Kaposi's sarcoma-associated herpesvirus infection|Epstein-Barr virus …
NONRATT017553.2	2.48139	1.31115	0.0275614	Up	Chr20	4694629	4696333	-	NM_001008845.1	0	sense	genic	exonic	overlapping	RT1-CE7	GeneID:368153,Genbank:NM_001008845.1,RGD:1595786	RT1 class I, locus CE7	GO:0016021	integral component of membrane	rno04514,rno04144,rno04145,rno04218,rno04650,rno04612,rno05203,rno05320,rno05330,rno05332,rno05416,rno04940,rno05166,rno05168,rno05167,rno05169,rno05165	Cell adhesion molecules (CAMs)|Endocytosis|Phagosome|Cellular senescence|Natural killer cell mediated cytotoxicity|Antigen processing and presentation|Viral carcinogenesis|Autoimmune thyroid disease|Allograft rejection|Graft-versus-host disease|Viral myocarditis|Type I diabetes mellitus|HTLV-I infection|Herpes simplex infection|Kaposi's sarcoma-associated herpesvirus infection|Epstein-Barr virus …
NONRATT017562.2	5.50133	2.45978	0.00620905	Up	Chr20	4887668	4906481	-	NM_001033986.1	0	sense	genic	intronic	containing	RT1-CE5	GeneID:309607,Genbank:NM_001033986.1,RGD:1595868	RT1 class I, locus CE5, transcript variant 2	GO:0005886,GO:0006955,GO:0009986,GO:0016021,GO:0042605,GO:0042612,GO:0046978,GO:0046979,GO:0002474,GO:0005102,GO:0005783	plasma membrane|immune response|cell surface|integral component of membrane|peptide antigen binding|MHC class I protein complex|TAP1 binding|TAP2 binding|antigen processing and presentation of peptide antigen via MHC class I|signaling receptor binding|endoplasmic reticulum	rno04514,rno04144,rno04145,rno04218,rno04650,rno04612,rno05203,rno05320,rno05330,rno05332,rno05416,rno04940,rno05166,rno05168,rno05167,rno05169,rno05165	Cell adhesion molecules (CAMs)|Endocytosis|Phagosome|Cellular senescence|Natural killer cell mediated cytotoxicity|Antigen processing and presentation|Viral carcinogenesis|Autoimmune thyroid disease|Allograft rejection|Graft-versus-host disease|Viral myocarditis|Type I diabetes mellitus|HTLV-I infection|Herpes simplex infection|Kaposi's sarcoma-associated herpesvirus infection|Epstein-Barr virus …
NONRATT017613.2	23.6072	4.56116	0.0205719	Up	Chr20	6856004	6858683	-	NM_001034188.1	0	sense	genic	intronic	nested	Ppil1	GeneID:309651,Genbank:NM_001034188.1,RGD:1309119	peptidylprolyl isomerase like 1	GO:0000413,GO:0003674,GO:0003755,GO:0005575,GO:0005634,GO:0006457,GO:0008150,GO:0071007,GO:0071013,GO:0000398,GO:0097718	protein peptidyl-prolyl isomerization|molecular_function|peptidyl-prolyl cis-trans isomerase activity|cellular_component|nucleus|protein folding|biological_process|U2-type catalytic step 2 spliceosome|catalytic step 2 spliceosome|mRNA splicing, via spliceosome|disordered domain specific binding	rno03040	Spliceosome
NONRATT017649.2	3.03403	1.60124	0.000514734	Up	Chr20	10668735	10669511	-	NM_021693.2	1236	sense	intergenic	downstream	same_strand	Sik1	GeneID:59329,Genbank:NM_021693.2,RGD:69407	salt-inducible kinase 1	GO:0005524,GO:0005634,GO:0005737,GO:0010868,GO:0019901,GO:0005829,GO:0032792,GO:0032870,GO:0048511,GO:0035556,GO:0055007,GO:0071889,GO:2000210,GO:0000122,GO:0000287,GO:0002028,GO:0004674,GO:0005515,GO:0006468,GO:0007346,GO:0008140,GO:0042826,GO:0043153,GO:0010830,GO:0043276,GO:0045595,GO:0045721,GO:0046777	ATP binding|nucleus|cytoplasm|negative regulation of triglyceride biosynthetic process|protein kinase binding|cytosol|negative regulation of CREB transcription factor activity|cellular response to hormone stimulus|rhythmic process|intracellular signal transduction|cardiac muscle cell differentiation|14-3-3 protein binding|positive regulation of anoikis|negative regulation of transcription by RNA …	rno04922	Glucagon signaling pathway
NONRATT017681.2	0.455467	-1.13458	0.0373597	Down	Chr20	13128169	13129808	-	NM_001191564.1	199	antisense	intergenic	downstream	convergent	Dip2a	GeneID:690211,Genbank:NM_001191564.1,RGD:1582897	disco-interacting protein 2 homolog A	GO:0010629,GO:0042981,GO:0003824,GO:0009986	negative regulation of gene expression|regulation of apoptotic process|catalytic activity|cell surface
NONRATT017751.2	4.15277	2.05407	0.0218592	Up	Chr20	32223481	32223841	-	NM_001037201.1	0	sense	genic	exonic	nested	Ddx21	GeneID:317399,Genbank:NM_001037201.1,RGD:1307306	DEAD-box helicase 21	GO:0019843,GO:0004004,GO:0030515,GO:0005524,GO:0005634,GO:0005654,GO:0005730,GO:0005737,GO:0035198,GO:0006364,GO:0006366,GO:0043330,GO:0097322,GO:0009615,GO:0003725,GO:0010501	rRNA binding|ATP-dependent RNA helicase activity|snoRNA binding|ATP binding|nucleus|nucleoplasm|nucleolus|cytoplasm|miRNA binding|rRNA processing|transcription by RNA polymerase II|response to exogenous dsRNA|7SK snRNA binding|response to virus|double-stranded RNA binding|RNA secondary structure unwinding
NONRATT017882.2	2.15079	1.10487	0.0251211	Up	Chr3	2626064	2629253	+	XM_017591629.1	0	sense	genic	exonic	nested	Npdc1	GeneID:296562,Genbank:XM_017591629.1,RGD:1303156	neural proliferation, differentiation and control, 1, transcript variant X1	GO:0016021	integral component of membrane
NONRATT017917.2	2.43702	1.28512	0.0153408	Up	Chr3	4042567	4044927	+	NM_139104.1	0	sense	genic	exonic	overlapping	Egfl7	GeneID:245963,Genbank:NM_139104.1,RGD:708507	EGF-like-domain, multiple 7	GO:0045746,GO:0001570,GO:0048856,GO:0050789,GO:0001938,GO:0005102,GO:0005112,GO:0005509,GO:0005576,GO:0005615,GO:0007155,GO:0001525,GO:0009986,GO:0001568,GO:0030336	negative regulation of Notch signaling pathway|vasculogenesis|anatomical structure development|regulation of biological process|positive regulation of endothelial cell proliferation|signaling receptor binding|Notch binding|calcium ion binding|extracellular region|extracellular space|cell adhesion|angiogenesis|cell surface|blood vessel development|negative regulation of cell migration
NONRATT017937.2	0.451304	-1.14783	0.0146451	Down	Chr3	6797761	6798738	+	XM_017592085.1	0	sense	genic	exonic	nested	Olfm1	GeneID:93667,Genbank:XM_017592085.1,RGD:620320	olfactomedin 1, transcript variant X2	GO:0097060,GO:0030516,GO:0005615,GO:1902003,GO:0032281,GO:0005623,GO:1902430,GO:0043025,GO:0005783,GO:2001223,GO:0010628,GO:0010629,GO:0010718,GO:0023041,GO:0043204,GO:0044295,GO:0030054,GO:0030424,GO:0001540,GO:0051259,GO:0003190,GO:0060317	synaptic membrane|regulation of axon extension|extracellular space|regulation of amyloid-beta formation|AMPA glutamate receptor complex|cell|negative regulation of amyloid-beta formation|neuronal cell body|endoplasmic reticulum|negative regulation of neuron migration|positive regulation of gene expression|negative regulation of gene expression|positive regulation of epithelial to mesenchymal tran…
NONRATT018011.2	0	-Inf	0.0478731	Down	Chr3	8992989	8993226	+	NM_001108577.2	0	sense	genic	exonic	nested	Ptpa	GeneID:362102,Genbank:NM_001108577.2,RGD:1308354	protein phosphatase 2 phosphatase activator	GO:0051721,GO:0019888,GO:0003755,GO:0032515,GO:0005102,GO:0032516,GO:0005524,GO:0005634,GO:0005654,GO:0034704,GO:0005737,GO:0035307,GO:0035308,GO:0007052,GO:0042803,GO:0008160,GO:0000159,GO:0043065,GO:0043666,GO:0016887,GO:0000413	protein phosphatase 2A binding|protein phosphatase regulator activity|peptidyl-prolyl cis-trans isomerase activity|negative regulation of phosphoprotein phosphatase activity|signaling receptor binding|positive regulation of phosphoprotein phosphatase activity|ATP binding|nucleus|nucleoplasm|calcium channel complex|cytoplasm|positive regulation of protein dephosphorylation|negative regulation of p…	rno04931	Insulin resistance
NONRATT018056.2	7.98925	2.99806	3.14875e-05	Up	Chr3	12009595	12010715	+	NM_001109198.1	0	sense	genic	exonic	nested	Rpl12	GeneID:499782,Genbank:NM_001109198.1,RGD:1565106	ribosomal protein L12	GO:0005634,GO:0005730,GO:0005737,GO:0005840,GO:0006412,GO:0019843,GO:0022625,GO:0045901,GO:0070180,GO:0000027,GO:0003735	nucleus|nucleolus|cytoplasm|ribosome|translation|rRNA binding|cytosolic large ribosomal subunit|positive regulation of translational elongation|large ribosomal subunit rRNA binding|ribosomal large subunit assembly|structural constituent of ribosome	rno03010	Ribosome
NONRATT018144.2	296.159	8.21023	0.000356659	Up	Chr3	39967445	40038636	+	XM_017591674.1	0	sense	genic	exonic	nested	Galnt13	GeneID:311039,Genbank:XM_017591674.1,RGD:735044	polypeptide N-acetylgalactosaminyltransferase 13, transcript variant X7	GO:0005794,GO:0006493,GO:0009312,GO:0016020,GO:0016021,GO:0016266,GO:0018242,GO:0018243,GO:0030246,GO:0000139,GO:0046872,GO:0004653	Golgi apparatus|protein O-linked glycosylation|oligosaccharide biosynthetic process|membrane|integral component of membrane|O-glycan processing|protein O-linked glycosylation via serine|protein O-linked glycosylation via threonine|carbohydrate binding|Golgi membrane|metal ion binding|polypeptide N-acetylgalactosaminyltransferase activity	rno00512	Mucin type O-glycan biosynthesis
NONRATT018214.2	2.71382	1.44032	0.0244181	Up	Chr3	55646737	55647523	+	NM_130819.1	855	sense	intergenic	downstream	same_strand	Dhrs9	GeneID:170635,Genbank:NM_130819.1,RGD:620655	dehydrogenase/reductase 9	GO:0055114,GO:0004745,GO:0008209,GO:0030176,GO:0031090,GO:0042448,GO:0042573,GO:0042904,GO:0002138,GO:0047035,GO:0004022	oxidation-reduction process|retinol dehydrogenase activity|androgen metabolic process|integral component of endoplasmic reticulum membrane|organelle membrane|progesterone metabolic process|retinoic acid metabolic process|9-cis-retinoic acid biosynthetic process|retinoic acid biosynthetic process|testosterone dehydrogenase (NAD+) activity|alcohol dehydrogenase (NAD) activity	rno00830	Retinol metabolism
NONRATT018294.2	0.430607	-1.21556	0.0489878	Down	Chr3	65878924	65879531	+	XM_006234405.3	2669	sense	intergenic	downstream	same_strand	Ube2e3	GeneID:295686,Genbank:XM_006234405.3,RGD:1308894	ubiquitin-conjugating enzyme E2E 3, transcript variant X1	GO:0061631,GO:0070534,GO:0070936,GO:0070979,GO:0004842,GO:0005524,GO:0005634	ubiquitin conjugating enzyme activity|protein K63-linked ubiquitination|protein K48-linked ubiquitination|protein K11-linked ubiquitination|ubiquitin-protein transferase activity|ATP binding|nucleus	rno04120	Ubiquitin mediated proteolysis
NONRATT018304.2	0.155868	-2.6816	0.0280654	Down	Chr3	67850269	67944478	+	NM_001107739.2	0	sense	genic	exonic	overlapping	Dusp19	GeneID:311151,Genbank:NM_001107739.2,RGD:1307457	dual specificity phosphatase 19	GO:0046330,GO:0030295,GO:0005078,GO:0031434,GO:0005575,GO:0031435,GO:0005737,GO:0006469,GO:0006470,GO:0007254,GO:0032147,GO:0008138,GO:0043410,GO:0043507,GO:0008150,GO:0043508,GO:0008330,GO:0000188,GO:0045860,GO:0008579,GO:0003674,GO:0046329,GO:0004860	positive regulation of JNK cascade|protein kinase activator activity|MAP-kinase scaffold activity|mitogen-activated protein kinase kinase binding|cellular_component|mitogen-activated protein kinase kinase kinase binding|cytoplasm|negative regulation of protein kinase activity|protein dephosphorylation|JNK cascade|activation of protein kinase activity|protein tyrosine/serine/threonine phosphatase …
NONRATT018347.2	0.263573	-1.92372	0.0112832	Down	Chr3	79713640	79715959	+	NM_001107745.1	0	sense	genic	exonic	nested	C1qtnf4	GeneID:311184,Genbank:NM_001107745.1,RGD:1311006	C1q and tumor necrosis factor related protein 4	GO:1901224,GO:1904469,GO:2000778,GO:0005615,GO:0032755,GO:0070105	positive regulation of NIK/NF-kappaB signaling|positive regulation of tumor necrosis factor secretion|positive regulation of interleukin-6 secretion|extracellular space|positive regulation of interleukin-6 production|positive regulation of interleukin-6-mediated signaling pathway
NONRATT018396.2	13.6678	3.77271	0.0285408	Up	Chr3	92149976	92150299	+	NM_001013203.1	0	antisense	genic	intronic	nested	Trim44	GeneID:362172,Genbank:NM_001013203.1,RGD:1304877	tripartite motif-containing 44	GO:0002230,GO:0005622,GO:0008270,GO:0010468,GO:0045893,GO:0050821,GO:0061944,GO:1901224,GO:0001961	positive regulation of defense response to virus by host|intracellular|zinc ion binding|regulation of gene expression|positive regulation of transcription, DNA-templated|protein stabilization|negative regulation of protein K48-linked ubiquitination|positive regulation of NIK/NF-kappaB signaling|positive regulation of cytokine-mediated signaling pathway
NONRATT018398.2	0.27699	-1.85209	0.0184139	Down	Chr3	92643138	92643525	+	NM_001035233.1	0	sense	genic	intronic	nested	Slc1a2	GeneID:29482,Genbank:NM_001035233.1,RGD:3697	solute carrier family 1 (glial high affinity glutamate transporter), member 2, transcript variant 2	GO:0005887,GO:0006836,GO:0007399,GO:0007632,GO:0008509,GO:0009416,GO:0009611,GO:0031668,GO:0009986,GO:0035264,GO:0010259,GO:0042493,GO:0015293,GO:0042734,GO:0043005,GO:0043197,GO:0043198,GO:0043200,GO:0045202,GO:0046326,GO:0005313,GO:0005314,GO:0005886,GO:0015501,GO:0015813,GO:0016021,GO:0021537,GO:0046872,GO:0030424,GO:0055085,GO:0030534,GO:0070207,GO:0030673,GO:0070779,GO:0098656,GO:0098712	integral component of plasma membrane|neurotransmitter transport|nervous system development|visual behavior|anion transmembrane transporter activity|response to light stimulus|response to wounding|cellular response to extracellular stimulus|cell surface|multicellular organism growth|multicellular organism aging|response to drug|symporter activity|presynaptic membrane|neuron projection|dendritic s…	rno04724,rno05014	Glutamatergic synapse|Amyotrophic lateral sclerosis (ALS)
NONRATT018399.2	0.425117	-1.23407	0.00595169	Down	Chr3	92665365	92665770	+	NM_001302089.1	0	sense	genic	exonic	overlapping	Slc1a2	GeneID:29482,Genbank:NM_001302089.1,RGD:3697	solute carrier family 1 (glial high affinity glutamate transporter), member 2, transcript variant 3	GO:0005887,GO:0006836,GO:0007399,GO:0007632,GO:0008509,GO:0009416,GO:0009611,GO:0031668,GO:0009986,GO:0035264,GO:0010259,GO:0042493,GO:0015293,GO:0042734,GO:0043005,GO:0043197,GO:0043198,GO:0043200,GO:0045202,GO:0046326,GO:0005313,GO:0005314,GO:0005886,GO:0015501,GO:0015813,GO:0016021,GO:0021537,GO:0046872,GO:0030424,GO:0055085,GO:0030534,GO:0070207,GO:0030673,GO:0070779,GO:0098656,GO:0098712	integral component of plasma membrane|neurotransmitter transport|nervous system development|visual behavior|anion transmembrane transporter activity|response to light stimulus|response to wounding|cellular response to extracellular stimulus|cell surface|multicellular organism growth|multicellular organism aging|response to drug|symporter activity|presynaptic membrane|neuron projection|dendritic s…	rno04724,rno05014	Glutamatergic synapse|Amyotrophic lateral sclerosis (ALS)
NONRATT018438.2	0	-Inf	0.0173067	Down	Chr3	101160334	101190848	+	NM_001108587.1	0	sense	genic	exonic	nested	Ccdc34	GeneID:362187,Genbank:NM_001108587.1,RGD:1560583	coiled-coil domain containing 34
NONRATT018592.2	3.98412	1.99426	0.0183421	Up
NONRATT018593.2	3.06166	1.61431	0.000755269	Up
NONRATT018646.2	0.445129	-1.16771	0.0469413	Down	Chr3	128425304	128426000	+	XM_017591467.1	5740	sense	intergenic	downstream	same_strand	Plcb1	GeneID:24654,Genbank:XM_017591467.1,RGD:3344	phospholipase C beta 1, transcript variant X2	GO:2000560,GO:0005096,GO:0005509,GO:0005515,GO:0005516,GO:0005521,GO:0007215,GO:0005546,GO:0007420,GO:0007612,GO:0007613,GO:0021987,GO:0008277,GO:0031161,GO:0031965,GO:0032735,GO:0000086,GO:0043547,GO:0032957,GO:0045444,GO:0034284,GO:0000790,GO:0035556,GO:0045663,GO:0004435,GO:0045892,GO:0004871,GO:0048639,GO:0051726,GO:0060466,GO:0045893,GO:0070498,GO:0080154,GO:1900087,GO:1902618,GO:1904117,GO:…	positive regulation of CD24 biosynthetic process|GTPase activator activity|calcium ion binding|protein binding|calmodulin binding|lamin binding|glutamate receptor signaling pathway|phosphatidylinositol-4,5-bisphosphate binding|brain development|learning|memory|cerebral cortex development|regulation of G-protein coupled receptor protein signaling pathway|phosphatidylinositol catabolic process|nucl…	rno00562,rno04015,rno04310,rno04371,rno04020,rno04070,rno04072,rno04071,rno04022,rno04540,rno04611,rno04621,rno04062,rno04911,rno04922,rno04912,rno04915,rno04921,rno04926,rno04918,rno04919,rno04916,rno04924,rno04925,rno04927,rno04261,rno04270,rno04970,rno04971,rno04972,rno04961,rno04724,rno04725,rno04728,rno04726,rno04720,rno04730,rno04723,rno04750,rno04713,rno05200,rno05010,rno05016,rno04933,rno…	Inositol phosphate metabolism|Rap1 signaling pathway|Wnt signaling pathway|Apelin signaling pathway|Calcium signaling pathway|Phosphatidylinositol signaling system|Phospholipase D signaling pathway|Sphingolipid signaling pathway|cGMP - PKG signaling pathway|Gap junction|Platelet activation|NOD-like receptor signaling pathway|Chemokine signaling pathway|Insulin secretion|Glucagon signaling pathway…
NONRATT018664.2	5.91288	2.56386	0.0376749	Up	Chr3	138047409	138050442	+	NM_001033666.1	0	sense	genic	exonic	nested	Dstn	GeneID:502674,Genbank:NM_001033666.1,RGD:1588366	destrin, actin depolymerizing factor	GO:0030836,GO:0030864,GO:0051014,GO:0051015,GO:0005737,GO:0030042,GO:0030043	positive regulation of actin filament depolymerization|cortical actin cytoskeleton|actin filament severing|actin filament binding|cytoplasm|actin filament depolymerization|actin filament fragmentation
NONRATT018667.2	0.0409903	-4.60857	0.0156128	Down	Chr3	138343046	138756932	+	NM_001277235.1	0	sense	genic	exonic	overlapping	Sec23b	GeneID:362226,Genbank:NM_001277235.1,RGD:1310699	Sec23 homolog B, coat complex II component	GO:0008270,GO:0012505,GO:0030127,GO:0048471,GO:0090114,GO:0000139,GO:0005783,GO:0006886	zinc ion binding|endomembrane system|COPII vesicle coat|perinuclear region of cytoplasm|COPII-coated vesicle budding|Golgi membrane|endoplasmic reticulum|intracellular protein transport	rno04141	Protein processing in endoplasmic reticulum
NONRATT018728.2	49.02	5.6153	0.0231108	Up	Chr3	147597665	147598099	+	XM_017591954.1	0	sense	genic	exonic	nested	Scrt2	GeneID:366229,Genbank:XM_017591954.1,RGD:1564796	scratch family transcriptional repressor 2, transcript variant X2	GO:2001222,GO:0000122,GO:0003676,GO:0005634	regulation of neuron migration|negative regulation of transcription by RNA polymerase II|nucleic acid binding|nucleus
NONRATT018768.2	Inf	Inf	0.017353	Up	Chr3	148709555	148712496	-	XM_017591601.1	0	sense	genic	exonic	overlapping	Plagl2	GeneID:296281,Genbank:XM_017591601.1,RGD:1307999	PLAG1 like zinc finger 2, transcript variant X2	GO:0005634,GO:0006366,GO:0006629,GO:0006915,GO:0009791,GO:0034378,GO:0043565,GO:0045944,GO:1903955,GO:2001244,GO:0000981,GO:0001077	nucleus|transcription by RNA polymerase II|lipid metabolic process|apoptotic process|post-embryonic development|chylomicron assembly|sequence-specific DNA binding|positive regulation of transcription by RNA polymerase II|positive regulation of protein targeting to mitochondrion|positive regulation of intrinsic apoptotic signaling pathway|RNA polymerase II transcription factor activity, sequence-s…
NONRATT018773.2	2.39725	1.26138	0.00931875	Up	Chr3	149252227	149254147	+	XM_006235294.3	2759	sense	intergenic	downstream	same_strand	Mapre1	GeneID:114764,Genbank:XM_006235294.3,RGD:621781	microtubule-associated protein, RP/EB family, member 1, transcript variant X1	GO:0042802,GO:0005874,GO:0042995,GO:0045296,GO:0005881,GO:0015630,GO:0019901,GO:0030981,GO:0031115,GO:0051010,GO:0031116,GO:0031253,GO:0051301,GO:0035371,GO:0005794,GO:0070507,GO:0035372,GO:0005813,GO:1903033,GO:0005819	identical protein binding|microtubule|cell projection|cadherin binding|cytoplasmic microtubule|microtubule cytoskeleton|protein kinase binding|cortical microtubule cytoskeleton|negative regulation of microtubule polymerization|microtubule plus-end binding|positive regulation of microtubule polymerization|cell projection membrane|cell division|microtubule plus-end|Golgi apparatus|regulation of mic…
NONRATT018782.2	9.16513	3.19616	0.0391975	Up	Chr3	150038968	150041557	+	XM_017591603.1	0	sense	genic	exonic	overlapping	Cbfa2t2	GeneID:296293,Genbank:XM_017591603.1,RGD:1309088	CBFA2/RUNX1 translocation partner 2, transcript variant X4	GO:0003714,GO:0005634,GO:0010976,GO:0030855,GO:0045746,GO:0045892,GO:0046872,GO:0060575,GO:0000122,GO:0003700	transcription corepressor activity|nucleus|positive regulation of neuron projection development|epithelial cell differentiation|negative regulation of Notch signaling pathway|negative regulation of transcription, DNA-templated|metal ion binding|intestinal epithelial cell differentiation|negative regulation of transcription by RNA polymerase II|DNA binding transcription factor activity
NONRATT018828.2	2.37591	1.24848	0.0431152	Up	Chr3	154850104	154851142	-	XM_017591929.1	11575	antisense	intergenic	upstream	divergent	Snhg11	GeneID:362256,Genbank:XM_017591929.1,RGD:1563912	small nucleolar RNA host gene 11, transcript variant X2
NONRATT018872.2	0.177212	-2.49645	0.0394413	Down	Chr3	161019821	161045468	+	NM_001109457.1	0	antisense	genic	exonic	overlapping	Eppin	GeneID:685161,Genbank:NM_001109457.1,RGD:1597722	epididymal peptidase inhibitor	GO:0005737,GO:0009986,GO:0010466,GO:0010951,GO:0032991,GO:0042742,GO:0051259,GO:0090281,GO:1901318,GO:0001669,GO:0004867,GO:0005615	cytoplasm|cell surface|negative regulation of peptidase activity|negative regulation of endopeptidase activity|protein-containing complex|defense response to bacterium|protein complex oligomerization|negative regulation of calcium ion import|negative regulation of flagellated sperm motility|acrosomal vesicle|serine-type endopeptidase inhibitor activity|extracellular space
NONRATT018904.2	0	-Inf	0.0477898	Down	Chr3	164248925	164249665	+	XM_008762515.2	0	sense	genic	exonic	nested	Rnf114	GeneID:362277,Genbank:XM_008762515.2,RGD:1303139	ring finger protein 114, transcript variant X1	GO:0061630,GO:0005622,GO:0005634,GO:0005829,GO:0005886,GO:0007275,GO:0007283,GO:0030154,GO:0031624,GO:0000209,GO:0032436,GO:0003676,GO:0046872,GO:0004842	ubiquitin protein ligase activity|intracellular|nucleus|cytosol|plasma membrane|multicellular organism development|spermatogenesis|cell differentiation|ubiquitin conjugating enzyme binding|protein polyubiquitination|positive regulation of proteasomal ubiquitin-dependent protein catabolic process|nucleic acid binding|metal ion binding|ubiquitin-protein transferase activity
NONRATT018957.2	0.0676833	-3.88506	0.0424979	Down	Chr3	176117544	176120260	+	XM_003749640.3	0	sense	genic	exonic	nested	Col9a3	GeneID:362285,Genbank:XM_003749640.3,RGD:1310255	collagen, type IX, alpha 3, transcript variant X1	GO:0008150,GO:0008584,GO:0008585,GO:0003674,GO:0005575,GO:0005594	biological_process|male gonad development|female gonad development|molecular_function|cellular_component|collagen type IX trimer	rno04151,rno04512,rno04510,rno04974,rno05165	PI3K-Akt signaling pathway|ECM-receptor interaction|Focal adhesion|Protein digestion and absorption|Human papillomavirus infection
NONRATT019123.2	0.263425	-1.92454	0.00611042	Down	Chr3	8406781	8408275	-	NM_001137562.2	914	antisense	intergenic	downstream	convergent	Urm1	GeneID:311840,Genbank:NM_001137562.2,RGD:1306599	ubiquitin related modifier 1	GO:0032447,GO:0034227,GO:0002098,GO:0005829,GO:0016783	protein urmylation|tRNA thio-modification|tRNA wobble uridine modification|cytosol|sulfurtransferase activity	rno04122	Sulfur relay system
NONRATT019127.2	0.163572	-2.612	1.13641e-06	Down	Chr3	8678461	8690286	-	NM_001100707.1	0	sense	genic	exonic	nested	Zer1	GeneID:311842,Genbank:NM_001100707.1,RGD:1310284	zyg-11 related, cell cycle regulator	GO:0031462,GO:0051438,GO:0004842,GO:0016567	Cul2-RING ubiquitin ligase complex|regulation of ubiquitin-protein transferase activity|ubiquitin-protein transferase activity|protein ubiquitination
NONRATT019153.2	0	-Inf	0.0290567	Down	Chr3	9865700	9868732	-	NM_138914.1	0	sense	genic	exonic	nested	Fnbp1	GeneID:192348,Genbank:NM_138914.1,RGD:621350	formin binding protein 1	GO:0005886,GO:0005905,GO:0005938,GO:0006897,GO:0007399,GO:0008289,GO:0030154,GO:0031410,GO:0042802,GO:0005515,GO:0005764,GO:0005856	plasma membrane|clathrin-coated pit|cell cortex|endocytosis|nervous system development|lipid binding|cell differentiation|cytoplasmic vesicle|identical protein binding|protein binding|lysosome|cytoskeleton
NONRATT019192.2	0.333408	-1.58464	0.012769	Down	Chr3	11972856	11974583	-	NM_001107833.1	0	sense	genic	exonic	nested	Lrsam1	GeneID:311866,Genbank:NM_001107833.1,RGD:1564403	leucine rich repeat and sterile alpha motif containing 1	GO:0061630,GO:0005737,GO:0070086,GO:0005829,GO:0005886,GO:0007165,GO:0016020,GO:0098656,GO:0030163,GO:1904417,GO:0034702,GO:0045806,GO:2000786,GO:0046755,GO:0000209,GO:0051865,GO:0004842,GO:0005225	ubiquitin protein ligase activity|cytoplasm|ubiquitin-dependent endocytosis|cytosol|plasma membrane|signal transduction|membrane|anion transmembrane transport|protein catabolic process|positive regulation of xenophagy|ion channel complex|negative regulation of endocytosis|positive regulation of autophagosome assembly|viral budding|protein polyubiquitination|protein autoubiquitination|ubiquitin-pr…
NONRATT019204.2	0.42901	-1.22092	0.0117036	Down	Chr3	12448281	12450232	-	XM_006234022.3	2473	sense	intergenic	downstream	same_strand	Zbtb34	GeneID:689174,Genbank:XM_006234022.3,RGD:1596130	zinc finger and BTB domain containing 34, transcript variant X1	GO:0003676,GO:0005654	nucleic acid binding|nucleoplasm
NONRATT019207.2	0.473018	-1.08003	0.0308251	Down	Chr3	12780195	12783056	-	XM_017591884.1	0	sense	genic	exonic	nested	Mvb12b	GeneID:362118,Genbank:XM_017591884.1,RGD:1309709	multivesicular body subunit 12B, transcript variant X1	GO:0005770,GO:0005829,GO:0005886,GO:0008289,GO:0019075,GO:0031982,GO:0042058,GO:0043130,GO:0048524,GO:0000813,GO:0005634,GO:0005769	late endosome|cytosol|plasma membrane|lipid binding|virus maturation|vesicle|regulation of epidermal growth factor receptor signaling pathway|ubiquitin binding|positive regulation of viral process|ESCRT I complex|nucleus|early endosome	rno04144	Endocytosis
NONRATT019306.2	0.290759	-1.7821	8.46585e-05	Down	Chr3	44078500	44079340	-	NM_001008311.3	1010	sense	intergenic	downstream	same_strand	Ermn	GeneID:295619,Genbank:NM_001008311.3,RGD:1308367	ermin	GO:0005938,GO:0007015,GO:0008360,GO:0030175,GO:0031344,GO:0033269,GO:0033270,GO:0043025,GO:0043209,GO:0051015,GO:0001763,GO:0005737,GO:0005856	cell cortex|actin filament organization|regulation of cell shape|filopodium|regulation of cell projection organization|internode region of axon|paranode region of axon|neuronal cell body|myelin sheath|actin filament binding|morphogenesis of a branching structure|cytoplasm|cytoskeleton
NONRATT019385.2	0.388528	-1.36391	0.00139193	Down	Chr3	60555516	60555993	-	NM_032083.1	0	sense	genic	exonic	overlapping	Chn1	GeneID:84030,Genbank:NM_032083.1,RGD:620139	chimerin 1	GO:0048013,GO:0005622,GO:0005737,GO:0050770,GO:0007165,GO:0008045,GO:0035556,GO:0043087,GO:0051056,GO:0043547,GO:0046872,GO:0001565,GO:0046875,GO:0005096	ephrin receptor signaling pathway|intracellular|cytoplasm|regulation of axonogenesis|signal transduction|motor neuron axon guidance|intracellular signal transduction|regulation of GTPase activity|regulation of small GTPase mediated signal transduction|positive regulation of GTPase activity|metal ion binding|phorbol ester receptor activity|ephrin receptor binding|GTPase activator activity
NONRATT019415.2	2.89037	1.53126	0.0343914	Up	Chr3	67728540	67729788	-	NM_031618.1	0	sense	genic	exonic	nested	Nckap1	GeneID:58823,Genbank:NM_031618.1,RGD:61939	NCK-associated protein 1	GO:0010172,GO:0010592,GO:0016021,GO:0016477,GO:0016601,GO:0035050,GO:0030027,GO:0042074,GO:0030031,GO:0044877,GO:0030032,GO:0045175,GO:0045176,GO:0048339,GO:0048340,GO:0048365,GO:0000902,GO:0001701,GO:0001726,GO:0001756,GO:0001843,GO:0005515,GO:0007354,GO:0007492,GO:0008078,GO:0030838,GO:0030866,GO:0030903,GO:0030950,GO:0031209,GO:0048570,GO:0031258,GO:0048617,GO:0031941,GO:0048812,GO:0032880,GO:…	embryonic body morphogenesis|positive regulation of lamellipodium assembly|integral component of membrane|cell migration|Rac protein signal transduction|embryonic heart tube development|lamellipodium|cell migration involved in gastrulation|cell projection assembly|protein-containing complex binding|lamellipodium assembly|basal protein localization|apical protein localization|paraxial mesoderm dev…	rno04810	Regulation of actin cytoskeleton
NONRATT019425.2	0.458697	-1.12439	0.0464076	Down	Chr3	71988253	71989456	-	XM_006234459.3	12448	sense	intergenic	downstream	same_strand	Ctnnd1	GeneID:311163,Genbank:XM_006234459.3,RGD:1305643	catenin delta 1, transcript variant X7	GO:0098609,GO:0030426,GO:0007420,GO:0005515,GO:1900086,GO:0030496,GO:0007435,GO:0005634,GO:0043197,GO:0010954,GO:0045202,GO:0005737,GO:0005829,GO:0005886,GO:0016020,GO:0045296,GO:0019901,GO:0005911,GO:0050839,GO:0019904,GO:0005913,GO:0060690,GO:0030027,GO:0005915,GO:0001738,GO:0072102,GO:0005923,GO:0001822,GO:0090090,GO:0030216,GO:0007155,GO:0005102	cell-cell adhesion|growth cone|brain development|protein binding|positive regulation of peptidyl-tyrosine autophosphorylation|midbody|salivary gland morphogenesis|nucleus|dendritic spine|positive regulation of protein processing|synapse|cytoplasm|cytosol|plasma membrane|membrane|cadherin binding|protein kinase binding|cell-cell junction|cell adhesion molecule binding|protein domain specific bindi…	rno04015,rno04520,rno04670	Rap1 signaling pathway|Adherens junction|Leukocyte transendothelial migration
NONRATT019496.2	4.06428	2.023	0.00104612	Up	Chr3	83310875	83318476	-	XM_006234586.1	0	sense	genic	exonic	overlapping	Api5	GeneID:362170,Genbank:XM_006234586.1,RGD:1309772	apoptosis inhibitor 5, transcript variant X1	GO:0005634,GO:0005681,GO:0008150,GO:0016607,GO:0017134,GO:0043066,GO:2000270,GO:0003674,GO:0003723,GO:0005575	nucleus|spliceosomal complex|biological_process|nuclear speck|fibroblast growth factor binding|negative regulation of apoptotic process|negative regulation of fibroblast apoptotic process|molecular_function|RNA binding|cellular_component
NONRATT019513.2	5.30694	2.40788	0.00582758	Up	Chr3	92725185	92726335	-	XM_008762055.2	0	sense	genic	exonic	nested	Cd44	GeneID:25406,Genbank:XM_008762055.2,RGD:2307	CD44 molecule (Indian blood group), transcript variant X2	GO:0005515,GO:0005540,GO:0005634,GO:0005794,GO:0010628,GO:0005829,GO:0014070,GO:0016021,GO:0005886,GO:0016055,GO:0016323,GO:0016324,GO:0033031,GO:0033138,GO:0016477,GO:0033189,GO:0033674,GO:0034116,GO:0001558,GO:0044344,GO:0034238,GO:0001658,GO:0035692,GO:0001955,GO:0045590,GO:0002246,GO:0050728,GO:0002906,GO:0050731,GO:0004896,GO:0051216,GO:0005114,GO:2000392,GO:0005154,GO:2000562,GO:0051219,GO:…	protein binding|hyaluronic acid binding|nucleus|Golgi apparatus|positive regulation of gene expression|cytosol|response to organic cyclic compound|integral component of membrane|plasma membrane|Wnt signaling pathway|basolateral plasma membrane|apical plasma membrane|positive regulation of neutrophil apoptotic process|positive regulation of peptidyl-serine phosphorylation|cell migration|response t…	rno04512,rno04640,rno05206,rno05205,rno05169	ECM-receptor interaction|Hematopoietic cell lineage|MicroRNAs in cancer|Proteoglycans in cancer|Epstein-Barr virus infection
NONRATT019523.2	0.303172	-1.72179	0.00571944	Down	Chr3	94062537	94064123	-	XM_008762074.2	0	sense	genic	exonic	nested	LOC100362814	GeneID:100362814,Genbank:XM_008762074.2,RGD:2323964	hypothetical protein LOC100362814, transcript variant X1	GO:0016021	integral component of membrane
NONRATT019574.2	Inf	Inf	0.00570398	Up	Chr3	106007699	106008615	-	NM_001014181.1	0	sense	genic	exonic	overlapping	Dph6	GeneID:362191,Genbank:NM_001014181.1,RGD:1310006	diphthamine biosynthesis 6	GO:0005730,GO:0017178,GO:0017183,GO:0031647,GO:1903955,GO:0005524,GO:0005634	nucleolus|diphthine-ammonia ligase activity|peptidyl-diphthamide biosynthetic process from peptidyl-histidine|regulation of protein stability|positive regulation of protein targeting to mitochondrion|ATP binding|nucleus
NONRATT019577.2	Inf	Inf	0.000100089	Up	Chr3	107560177	107697642	-	XM_006234752.3	0	sense	genic	exonic	nested	Meis2	GeneID:311311,Genbank:XM_006234752.3,RGD:1305198	Meis homeobox 2, transcript variant X10	GO:0045944,GO:0003674,GO:0070848,GO:0003677,GO:0110024,GO:0003712,GO:0005575,GO:0005634,GO:0006366,GO:0008134,GO:0008542,GO:0009612,GO:0031016,GO:0043565,GO:0000978,GO:0045638,GO:0001077,GO:0045931,GO:0001654	positive regulation of transcription by RNA polymerase II|molecular_function|response to growth factor|DNA binding|positive regulation of cardiac muscle myoblast proliferation|transcription cofactor activity|cellular_component|nucleus|transcription by RNA polymerase II|transcription factor binding|visual learning|response to mechanical stimulus|pancreas development|sequence-specific DNA binding|R…
NONRATT019604.2	0.0759442	-3.71892	0.00109775	Down	Chr3	111833024	111837792	-	XM_017592198.1	0	sense	genic	exonic	overlapping	Sptbn5	GeneID:296090,Genbank:XM_017592198.1,RGD:1311047	spectrin, beta, non-erythrocytic 5, transcript variant X1	GO:0051015,GO:0007030,GO:0051260,GO:0007041,GO:0097381,GO:0008022,GO:0019894,GO:0030507,GO:0030863,GO:0032029,GO:0032391,GO:0034452,GO:0043621,GO:0045179,GO:0002046,GO:0045505,GO:0005737,GO:0046982,GO:0005875	actin filament binding|Golgi organization|protein homooligomerization|lysosomal transport|photoreceptor disc membrane|protein C-terminus binding|kinesin binding|spectrin binding|cortical cytoskeleton|myosin tail binding|photoreceptor connecting cilium|dynactin binding|protein self-association|apical cortex|opsin binding|dynein intermediate chain binding|cytoplasm|protein heterodimerization activi…
NONRATT019626.2	0	-Inf	0.00121853	Down	Chr3	113311119	113312165	-	XM_006234849.3	0	sense	genic	exonic	nested	Ppip5k1	GeneID:311355,Genbank:XM_006234849.3,RGD:1311552	diphosphoinositol pentakisphosphate kinase 1, transcript variant X8	GO:0033857,GO:0005829,GO:0000828,GO:0005886,GO:0006020,GO:0000829,GO:0052723,GO:0000832,GO:0005524,GO:0052724,GO:0005654,GO:0102092,GO:0016310,GO:0000827,GO:0032958	diphosphoinositol-pentakisphosphate kinase activity|cytosol|inositol hexakisphosphate kinase activity|plasma membrane|inositol metabolic process|inositol heptakisphosphate kinase activity|inositol hexakisphosphate 1-kinase activity|inositol hexakisphosphate 5-kinase activity|ATP binding|inositol hexakisphosphate 3-kinase activity|nucleoplasm|5-diphosphoinositol pentakisphosphate 3-kinase activity…	rno04070	Phosphatidylinositol signaling system
NONRATT019628.2	3.14438	1.65278	0.00586865	Up	Chr3	113369346	113369864	-	XM_008762187.2	0	sense	genic	exonic	nested	Catsper2	GeneID:366174,Genbank:XM_008762187.2,RGD:1307620	cation channel, sperm associated 2, transcript variant X2	GO:0036128,GO:0005248,GO:0005261,GO:0045956,GO:0005262,GO:0005886,GO:0006816,GO:0007275,GO:0008332,GO:0048240,GO:0009566,GO:0070509,GO:0019228,GO:0070588,GO:0030317,GO:0086010,GO:0034765,GO:0005227,GO:0035725,GO:0005244,GO:0036126,GO:0005245	CatSper complex|voltage-gated sodium channel activity|cation channel activity|positive regulation of calcium ion-dependent exocytosis|calcium channel activity|plasma membrane|calcium ion transport|multicellular organism development|low voltage-gated calcium channel activity|sperm capacitation|fertilization|calcium ion import|neuronal action potential|calcium ion transmembrane transport|flagellate…
NONRATT019636.2	3.32285	1.73242	0.0189475	Up	Chr3	114287755	114288411	-	XM_008762216.2	0	sense	genic	exonic	overlapping	Shf	GeneID:362205,Genbank:XM_008762216.2,RGD:1562705	Src homology 2 domain containing F
NONRATT019740.2	0.495109	-1.01418	0.032179	Down	Chr3	138701313	138703436	-	NM_019219.2	0	sense	genic	exonic	overlapping	Rbbp9	GeneID:29459,Genbank:NM_019219.2,RGD:3542	RB binding protein 9, serine hydrolase	GO:0005737,GO:0016787,GO:0042127,GO:0005515,GO:0005654	cytoplasm|hydrolase activity|regulation of cell proliferation|protein binding|nucleoplasm
NONRATT019765.2	0.424512	-1.23612	0.00319884	Down	Chr3	143223268	143223478	-	NM_012837.1	0	sense	genic	exonic	nested	Cst3	GeneID:25307,Genbank:NM_012837.1,RGD:2432	cystatin C	GO:0004869,GO:0005576,GO:0005604,GO:0005615,GO:0009743,GO:0005737,GO:0010035,GO:0005764,GO:0010466,GO:0005771,GO:0010711,GO:0010716,GO:0014070,GO:0030414,GO:0043292,GO:0030424,GO:0045740,GO:0031667,GO:0045861,GO:0031965,GO:0048471,GO:0048678,GO:0060009,GO:0060311,GO:0001540,GO:0060313,GO:0001654,GO:0060548,GO:0001666,GO:0070301,GO:0001775,GO:0002020,GO:0004866,GO:0005783,GO:0006915,GO:0006952,GO:…	cysteine-type endopeptidase inhibitor activity|extracellular region|basement membrane|extracellular space|response to carbohydrate|cytoplasm|response to inorganic substance|lysosome|negative regulation of peptidase activity|multivesicular body|negative regulation of collagen catabolic process|negative regulation of extracellular matrix disassembly|response to organic cyclic compound|peptidase inh…	rno04970	Salivary secretion
NONRATT019804.2	6.57499	2.71699	0.0115325	Up	Chr3	147813469	147814053	-	NM_144755.2	3	sense	intergenic	downstream	same_strand	Trib3	GeneID:246273,Genbank:NM_144755.2,RGD:708432	tribbles pseudokinase 3	GO:0005730,GO:0006351,GO:0006468,GO:0006469,GO:0010827,GO:0012501,GO:0034976,GO:0016301,GO:0043405,GO:0019899,GO:0045599,GO:0045717,GO:0045892,GO:0051443,GO:0055106,GO:0000122,GO:0003714,GO:0004860,GO:0005524,GO:0005634,GO:0019901,GO:0031434,GO:0031625,GO:0031965,GO:0032092,GO:0070059,GO:0032436,GO:0032869	nucleolus|transcription, DNA-templated|protein phosphorylation|negative regulation of protein kinase activity|regulation of glucose transmembrane transport|programmed cell death|response to endoplasmic reticulum stress|kinase activity|regulation of MAP kinase activity|enzyme binding|negative regulation of fat cell differentiation|negative regulation of fatty acid biosynthetic process|negative reg…	rno04931	Insulin resistance
NONRATT019833.2	0.293629	-1.76794	0.018398	Down	Chr3	150049450	150050609	-	XM_017591780.1	0	sense	genic	exonic	nested	Necab3	GeneID:311562,Genbank:XM_017591780.1,RGD:1310124	N-terminal EF-hand calcium binding protein 3, transcript variant X1	GO:0005783,GO:0005789,GO:0005794,GO:0019538,GO:0042984,GO:0000137,GO:0005509,GO:0005737	endoplasmic reticulum|endoplasmic reticulum membrane|Golgi apparatus|protein metabolic process|regulation of amyloid precursor protein biosynthetic process|Golgi cis cisterna|calcium ion binding|cytoplasm
NONRATT019877.2	0.0385572	-4.69686	0.00150697	Down	Chr3	155264218	155267001	+	XM_008762385.1	0	sense	genic	exonic	nested	Ppp1r16b	GeneID:680616,Genbank:XM_008762385.1,RGD:1589460	protein phosphatase 1, regulatory subunit 16B, transcript variant X3	GO:0014066,GO:0016607,GO:0019888,GO:0035304,GO:0035307,GO:0035308,GO:0042995,GO:0043666,GO:0048471,GO:0061028,GO:0001938,GO:1902309,GO:0005634,GO:1903589,GO:0005886	regulation of phosphatidylinositol 3-kinase signaling|nuclear speck|protein phosphatase regulator activity|regulation of protein dephosphorylation|positive regulation of protein dephosphorylation|negative regulation of protein dephosphorylation|cell projection|regulation of phosphoprotein phosphatase activity|perinuclear region of cytoplasm|establishment of endothelial barrier|positive regulation…
NONRATT019885.2	0	-Inf	0.00693625	Down	Chr3	154863433	154864461	+	XM_017591929.1	0	sense	genic	exonic	nested	Snhg11	GeneID:362256,Genbank:XM_017591929.1,RGD:1563912	small nucleolar RNA host gene 11, transcript variant X2
NONRATT019895.2	Inf	Inf	0.00201732	Up	Chr3	154043928	154045883	+	NM_001270867.1	0	sense	genic	exonic	nested	Nnat	GeneID:94270,Genbank:NM_001270867.1,RGD:620155	neuronatin, transcript variant 3	GO:0007420,GO:0009749,GO:0030182,GO:0032024,GO:0032880,GO:0005737	brain development|response to glucose|neuron differentiation|positive regulation of insulin secretion|regulation of protein localization|cytoplasm
NONRATT020003.2	2.65088	1.40647	0.00672475	Up	Chr3	164976211	164986370	-	NM_001106544.1	0	sense	genic	exonic	overlapping	Dpm1	GeneID:296394,Genbank:NM_001106544.1,RGD:1310120	dolichyl-phosphate mannosyltransferase polypeptide 1, catalytic subunit	GO:0035268,GO:0004582,GO:0035269,GO:0005537,GO:0005783,GO:0005789,GO:0006506,GO:0043178,GO:0016020,GO:0043231,GO:0019348,GO:0004169,GO:0019673,GO:0033185	protein mannosylation|dolichyl-phosphate beta-D-mannosyltransferase activity|protein O-linked mannosylation|mannose binding|endoplasmic reticulum|endoplasmic reticulum membrane|GPI anchor biosynthetic process|alcohol binding|membrane|intracellular membrane-bounded organelle|dolichol metabolic process|dolichyl-phosphate-mannose-protein mannosyltransferase activity|GDP-mannose metabolic process|dol…	rno00510	N-Glycan biosynthesis
NONRATT020004.2	0.280387	-1.83451	0.00266321	Down	Chr3	165018645	165019878	-	NM_001106545.1	352	sense	intergenic	downstream	same_strand	Kcng1	GeneID:296395,Genbank:NM_001106545.1,RGD:631416	potassium voltage-gated channel modifier subfamily G member 1	GO:1902259,GO:0005251,GO:0005886,GO:0006813,GO:0008076,GO:0016021,GO:0051260,GO:0071805,GO:0005249	regulation of delayed rectifier potassium channel activity|delayed rectifier potassium channel activity|plasma membrane|potassium ion transport|voltage-gated potassium channel complex|integral component of membrane|protein homooligomerization|potassium ion transmembrane transport|voltage-gated potassium channel activity
NONRATT020006.2	Inf	Inf	0.0046113	Up	Chr3	165672194	165672582	-	NM_001106546.1	6725	sense	intergenic	downstream	same_strand	Zfp93	GeneID:296399,Genbank:NM_001106546.1,RGD:1309760	zinc finger protein 93	GO:0003676	nucleic acid binding
NONRATT020025.2	3.07491	1.62055	0.000629011	Up	Chr3	171292271	171294850	-	XM_006235674.3	210	sense	intergenic	upstream	same_strand	Zbp1	GeneID:171091,Genbank:XM_006235674.3,RGD:619956	Z-DNA binding protein 1, transcript variant X1	GO:0003723,GO:0003726,GO:0005634,GO:0005737,GO:0005829,GO:0042802,GO:0060340,GO:0003677,GO:0003692	RNA binding|double-stranded RNA adenosine deaminase activity|nucleus|cytoplasm|cytosol|identical protein binding|positive regulation of type I interferon-mediated signaling pathway|DNA binding|left-handed Z-DNA binding	rno04217,rno04623	Necroptosis|Cytosolic DNA-sensing pathway
NONRATT020084.2	0.434683	-1.20196	0.0337565	Down	Chr3	173961634	173962061	+	XM_006235834.2	20	sense	intergenic	downstream	same_strand	Fam217b	GeneID:311692,Genbank:XM_006235834.2,RGD:1311952	family with sequence similarity 217, member B, transcript variant X2	GO:0005829,GO:0005654	cytosol|nucleoplasm
NONRATT020179.2	0.0669597	-3.90056	0.0359055	Down	Chr4	21495935	21496552	+	NM_001105712.1	0	sense	genic	intronic	nested	Grm3	GeneID:24416,Genbank:NM_001105712.1,RGD:2744	glutamate metabotropic receptor 3	GO:0097449,GO:0042734,GO:0005246,GO:0043005,GO:0005886,GO:0005887,GO:0007196,GO:0007216,GO:0008066,GO:0043197,GO:0014069,GO:0045211,GO:0016021,GO:0019233,GO:0001641,GO:0050804,GO:0030424,GO:0051966	astrocyte projection|presynaptic membrane|calcium channel regulator activity|neuron projection|plasma membrane|integral component of plasma membrane|adenylate cyclase-inhibiting G-protein coupled glutamate receptor signaling pathway|G-protein coupled glutamate receptor signaling pathway|glutamate receptor activity|dendritic spine|postsynaptic density|postsynaptic membrane|integral component of me…	rno04072,rno04080,rno04724,rno05030	Phospholipase D signaling pathway|Neuroactive ligand-receptor interaction|Glutamatergic synapse|Cocaine addiction
NONRATT020180.2	0.217708	-2.19954	1.22712e-06	Down	Chr4	21567779	21568967	+	NM_001109345.1	0	antisense	genic	intronic	nested	RGD1563349	GeneID:502727,Genbank:NM_001109345.1,RGD:1563349	similar to RIKEN cDNA 9330182L06	GO:0016021	integral component of membrane
NONRATT020189.2	0.00541103	-7.52988	0.000336308	Down	Chr4	22700905	22735234	+	XM_017592952.1	0	sense	genic	exonic	nested	LOC108350662	GeneID:108350662,Genbank:XM_017592952.1	disintegrin and metalloproteinase domain-containing protein 22-like, transcript variant X1
NONRATT020197.2	0	-Inf	0.0325712	Down	Chr4	25538544	25576897	+	XM_008762732.2	0	sense	genic	exonic	nested	Cfap69	GeneID:100910867,Genbank:XM_008762732.2,RGD:6496360	cilia and flagella associated protein 69, transcript variant X3
NONRATT020249.2	0	-Inf	0.00365865	Down	Chr4	39604951	39605157	+	XM_008762754.2	27398	antisense	intergenic	downstream	convergent	Vwde	GeneID:502731,Genbank:XM_008762754.2,RGD:1561223	von Willebrand factor D and EGF domains
NONRATT020261.2	19.8337	4.30988	0.0216851	Up	Chr4	44358963	44360410	+	NM_001039344.2	0	sense	genic	exonic	overlapping	Tes	GeneID:500040,Genbank:NM_001039344.2,RGD:1566346	testin LIM domain protein	GO:0005829,GO:0005886,GO:0005925,GO:0008270,GO:0008285,GO:0030054,GO:0032991,GO:0045296,GO:0005515,GO:0005737	cytosol|plasma membrane|focal adhesion|zinc ion binding|negative regulation of cell proliferation|cell junction|protein-containing complex|cadherin binding|protein binding|cytoplasm
NONRATT020270.2	0	-Inf	0.000207571	Down	Chr4	48308855	48309267	+	XM_008762854.1	0	sense	genic	exonic	nested	LOC102556178	GeneID:102556178,Genbank:XM_008762854.1,RGD:7531073	uncharacterized LOC102556178
NONRATT020338.2	Inf	Inf	0.0277645	Up
NONRATT020346.2	8.28853	3.05112	4.07457e-05	Up	Chr4	61782087	61784918	+	NM_173136.1	0	sense	genic	exonic	overlapping	Akr1b8	GeneID:286921,Genbank:NM_173136.1,RGD:708475	aldo-keto reductase family 1, member B8	GO:0008106,GO:0016491,GO:0055114,GO:0004032,GO:0005739,GO:0005829	alcohol dehydrogenase (NADP+) activity|oxidoreductase activity|oxidation-reduction process|alditol:NADP+ 1-oxidoreductase activity|mitochondrion|cytosol	rno00040,rno00051,rno00052,rno00561,rno00790	Pentose and glucuronate interconversions|Fructose and mannose metabolism|Galactose metabolism|Glycerolipid metabolism|Folate biosynthesis
NONRATT020382.2	0.370063	-1.43416	0.0150058	Down	Chr4	66420869	66421654	+	NM_001044233.2	0	sense	genic	exonic	nested	Clec2l	GeneID:296985,Genbank:NM_001044233.2,RGD:1565373	C-type lectin domain family 2, member L	GO:0016021,GO:0030246	integral component of membrane|carbohydrate binding
NONRATT020387.2	2.8184	1.49487	0.0289267	Up	Chr4	67381616	67389469	+	XM_006236357.3	0	antisense	genic	exonic	overlapping	Braf	GeneID:114486,Genbank:XM_006236357.3,RGD:619908	B-Raf proto-oncogene, serine/threonine kinase, transcript variant X2	GO:0005515,GO:0005524,GO:0005634,GO:0005737,GO:0005739,GO:0005829,GO:0010828,GO:0016020,GO:0005886,GO:0017016,GO:0030154,GO:0030878,GO:0043369,GO:0031267,GO:0043434,GO:0031434,GO:0043524,GO:0033138,GO:0044297,GO:0045580,GO:0046632,GO:0000165,GO:0070374,GO:0046982,GO:0000186,GO:0070413,GO:0048538,GO:0002318,GO:0048679,GO:0004672,GO:0071277,GO:0004674,GO:0090150,GO:1900026,GO:0004709,GO:1990090,GO:…	protein binding|ATP binding|nucleus|cytoplasm|mitochondrion|cytosol|positive regulation of glucose transmembrane transport|membrane|plasma membrane|Ras GTPase binding|cell differentiation|thyroid gland development|CD4-positive or CD8-positive, alpha-beta T cell lineage commitment|small GTPase binding|response to peptide hormone|mitogen-activated protein kinase kinase binding|negative regulation o…	rno04015,rno04010,rno04012,rno04068,rno04024,rno04150,rno04510,rno04810,rno04650,rno04062,rno04910,rno04914,rno04270,rno04726,rno04720,rno04730,rno04722,rno05200,rno05205,rno05210,rno05212,rno05225,rno05226,rno05214,rno05216,rno05221,rno05220,rno05218,rno05211,rno05219,rno05215,rno05213,rno05224,rno05223,rno05034,rno04934,rno05160,rno01521,rno01522	Rap1 signaling pathway|MAPK signaling pathway|ErbB signaling pathway|FoxO signaling pathway|cAMP signaling pathway|mTOR signaling pathway|Focal adhesion|Regulation of actin cytoskeleton|Natural killer cell mediated cytotoxicity|Chemokine signaling pathway|Insulin signaling pathway|Progesterone-mediated oocyte maturation|Vascular smooth muscle contraction|Serotonergic synapse|Long-term potentiatio…
NONRATT020406.2	0.00961486	-6.70052	0.04276	Down	Chr4	70903613	70911816	+	NM_001107857.1	0	sense	genic	exonic	nested	Ephb6	GeneID:312275,Genbank:NM_001107857.1,RGD:1306163	Eph receptor B6	GO:0048013,GO:0009986,GO:0004713,GO:0050663,GO:0030154,GO:0004714,GO:0050798,GO:0031434,GO:0004871,GO:0070374,GO:0004888,GO:0005003,GO:0005005,GO:0005524,GO:0032092,GO:0005737,GO:2000525,GO:0033674,GO:0005887,GO:0043005,GO:0043066,GO:0006468,GO:0001806,GO:0043235,GO:0007275,GO:0002456,GO:0043410,GO:0009968,GO:0004709	ephrin receptor signaling pathway|cell surface|protein tyrosine kinase activity|cytokine secretion|cell differentiation|transmembrane receptor protein tyrosine kinase activity|activated T cell proliferation|mitogen-activated protein kinase kinase binding|signal transducer activity|positive regulation of ERK1 and ERK2 cascade|transmembrane signaling receptor activity|ephrin receptor activity|trans…	rno04360	Axon guidance
NONRATT020533.2	3.93958	1.97804	0.0359286	Up	Chr4	97824503	97833266	+	NM_024127.2	39690	antisense	intergenic	upstream	divergent	Gadd45a	GeneID:25112,Genbank:NM_024127.2,RGD:2654	growth arrest and DNA-damage-inducible, alpha	GO:0005737,GO:0006469,GO:0006974,GO:0007098,GO:0046982,GO:0016607,GO:0047485,GO:0019900,GO:0051726,GO:0071260,GO:0071479,GO:0071850,GO:0000086,GO:0000185,GO:0000979,GO:0005634,GO:0042770,GO:0042803,GO:0043065,GO:0046330,GO:1900745,GO:2000379	cytoplasm|negative regulation of protein kinase activity|cellular response to DNA damage stimulus|centrosome cycle|protein heterodimerization activity|nuclear speck|protein N-terminus binding|kinase binding|regulation of cell cycle|cellular response to mechanical stimulus|cellular response to ionizing radiation|mitotic cell cycle arrest|G2/M transition of mitotic cell cycle|activation of MAPKKK a…	rno04010,rno04068,rno04110,rno04210,rno04115,rno04218,rno05200,rno05202,rno05210,rno05212,rno05225,rno05226,rno05214,rno05216,rno05220,rno05217,rno05218,rno05213,rno05224,rno05222,rno05223	MAPK signaling pathway|FoxO signaling pathway|Cell cycle|Apoptosis|p53 signaling pathway|Cellular senescence|Pathways in cancer|Transcriptional misregulation in cancers|Colorectal cancer|Pancreatic cancer|Hepatocellular carcinoma|Gastric cancer|Glioma|Thyroid cancer|Chronic myeloid leukemia|Basal cell carcinoma|Melanoma|Endometrial cancer|Breast cancer|Small cell lung cancer|Non-small cell lung c…
NONRATT020534.2	3.91258	1.96812	0.00127292	Up	Chr4	97828750	97833266	+	NM_024127.2	43937	antisense	intergenic	upstream	divergent	Gadd45a	GeneID:25112,Genbank:NM_024127.2,RGD:2654	growth arrest and DNA-damage-inducible, alpha	GO:0005737,GO:0006469,GO:0006974,GO:0007098,GO:0046982,GO:0016607,GO:0047485,GO:0019900,GO:0051726,GO:0071260,GO:0071479,GO:0071850,GO:0000086,GO:0000185,GO:0000979,GO:0005634,GO:0042770,GO:0042803,GO:0043065,GO:0046330,GO:1900745,GO:2000379	cytoplasm|negative regulation of protein kinase activity|cellular response to DNA damage stimulus|centrosome cycle|protein heterodimerization activity|nuclear speck|protein N-terminus binding|kinase binding|regulation of cell cycle|cellular response to mechanical stimulus|cellular response to ionizing radiation|mitotic cell cycle arrest|G2/M transition of mitotic cell cycle|activation of MAPKKK a…	rno04010,rno04068,rno04110,rno04210,rno04115,rno04218,rno05200,rno05202,rno05210,rno05212,rno05225,rno05226,rno05214,rno05216,rno05220,rno05217,rno05218,rno05213,rno05224,rno05222,rno05223	MAPK signaling pathway|FoxO signaling pathway|Cell cycle|Apoptosis|p53 signaling pathway|Cellular senescence|Pathways in cancer|Transcriptional misregulation in cancers|Colorectal cancer|Pancreatic cancer|Hepatocellular carcinoma|Gastric cancer|Glioma|Thyroid cancer|Chronic myeloid leukemia|Basal cell carcinoma|Melanoma|Endometrial cancer|Breast cancer|Small cell lung cancer|Non-small cell lung c…
NONRATT020567.2	Inf	Inf	0.00716458	Up	Chr4	100414248	100415795	+	XM_017592539.1	0	sense	genic	exonic	nested	Capg	GeneID:297339,Genbank:XM_017592539.1,RGD:1311724	capping actin protein, gelsolin like, transcript variant X5	GO:0071803,GO:0005730,GO:0072686,GO:0005737,GO:0090543,GO:0005814,GO:0019904,GO:0022617,GO:0030031,GO:0042470,GO:0044877,GO:0045296,GO:0045335,GO:0051015,GO:0005615,GO:0051016,GO:0005634,GO:0071346,GO:0005654	positive regulation of podosome assembly|nucleolus|mitotic spindle|cytoplasm|Flemming body|centriole|protein domain specific binding|extracellular matrix disassembly|cell projection assembly|melanosome|protein-containing complex binding|cadherin binding|phagocytic vesicle|actin filament binding|extracellular space|barbed-end actin filament capping|nucleus|cellular response to interferon-gamma|nuc…
NONRATT020590.2	11.1178	3.4748	0.0102324	Up	Chr4	109413754	109414287	+	NM_053289.1	52985	sense	intergenic	upstream	same_strand	Reg3b	GeneID:24618,Genbank:NM_053289.1,RGD:3254	regenerating islet-derived 3 beta	GO:0008284,GO:0019838,GO:0030246,GO:0031667,GO:0032355,GO:0032991,GO:0035690,GO:0050829,GO:0042588,GO:0042594,GO:0050830,GO:0042802,GO:0051260,GO:0060548,GO:0061844,GO:0070492,GO:0071356,GO:0001934,GO:0005615,GO:0005737,GO:0006952,GO:0006953,GO:0007494,GO:0007565,GO:0042834,GO:0043066,GO:0043434,GO:0043524,GO:0044278,GO:1903208,GO:0044849,GO:1903577,GO:0045177	positive regulation of cell proliferation|growth factor binding|carbohydrate binding|response to nutrient levels|response to estradiol|protein-containing complex|cellular response to drug|defense response to Gram-negative bacterium|zymogen granule|response to starvation|defense response to Gram-positive bacterium|identical protein binding|protein homooligomerization|negative regulation of cell de…
NONRATT020839.2	0.329355	-1.60228	0.00421616	Down	Chr4	149910910	149912215	+	XM_017593029.1	1070	sense	intergenic	downstream	same_strand	LOC100909657	GeneID:100909657,Genbank:XM_017593029.1,RGD:6502210	uncharacterized LOC100909657, transcript variant X2	GO:0003700,GO:0006355,GO:0000122,GO:0000978,GO:0001078	DNA binding transcription factor activity|regulation of transcription, DNA-templated|negative regulation of transcription by RNA polymerase II|RNA polymerase II proximal promoter sequence-specific DNA binding|transcriptional repressor activity, RNA polymerase II proximal promoter sequence-specific DNA binding
NONRATT021012.2	2.7868	1.47861	0.00625951	Up	Chr4	176440208	176441148	+	XM_017592905.1	4708	antisense	intergenic	downstream	convergent	Slco1a5	GeneID:80900,Genbank:XM_017592905.1,RGD:70985	solute carrier organic anion transporter family, member 1a5, transcript variant X5	GO:0043252,GO:0008514,GO:0050892,GO:0055085,GO:0015125,GO:0015347,GO:0015349,GO:0015711,GO:0070327,GO:0015718,GO:0015721,GO:0005887,GO:0031100,GO:0031526,GO:0008028	sodium-independent organic anion transport|organic anion transmembrane transporter activity|intestinal absorption|transmembrane transport|bile acid transmembrane transporter activity|sodium-independent organic anion transmembrane transporter activity|thyroid hormone transmembrane transporter activity|organic anion transport|thyroid hormone transport|monocarboxylic acid transport|bile acid and bil…	rno04976	Bile secretion
NONRATT021032.2	0.204864	-2.28726	0.0355394	Down	Chr4	179439311	179441044	+	XM_017593093.1	0	sense	genic	exonic	overlapping	Lrmp	GeneID:500361,Genbank:XM_017593093.1,RGD:1562062	lymphoid-restricted membrane protein, transcript variant X1	GO:0005783,GO:0005789,GO:0030176	endoplasmic reticulum|endoplasmic reticulum membrane|integral component of endoplasmic reticulum membrane
NONRATT021042.2	0.122249	-3.0321	0.016701	Down	Chr4	180897773	180899248	+	XM_008763402.1	0	sense	genic	exonic	nested	Fgfr1op2	GeneID:362463,Genbank:XM_008763402.1,RGD:1303233	FGFR1 oncogene partner 2, transcript variant X2	GO:0009611,GO:0042060,GO:0042803,GO:0003674,GO:0005575,GO:0005737	response to wounding|wound healing|protein homodimerization activity|molecular_function|cellular_component|cytoplasm
NONRATT021093.2	0.164156	-2.60686	0.00251348	Down	Chr4	6669289	6670030	-	XM_017592732.1	0	antisense	genic	intronic	nested	Prkag2	GeneID:373545,Genbank:XM_017592732.1,RGD:727782	protein kinase AMP-activated non-catalytic subunit gamma 2, transcript variant X7	GO:0031588,GO:0005524,GO:0005977,GO:0032147,GO:0006110,GO:0006468,GO:0006469,GO:0008603,GO:0008607,GO:0035556,GO:0010800,GO:0043531,GO:0016208,GO:0045860,GO:0019217,GO:0050790,GO:0019901,GO:0004679,GO:0071901,GO:0030295,GO:0004862	nucleotide-activated protein kinase complex|ATP binding|glycogen metabolic process|activation of protein kinase activity|regulation of glycolytic process|protein phosphorylation|negative regulation of protein kinase activity|cAMP-dependent protein kinase regulator activity|phosphorylase kinase regulator activity|intracellular signal transduction|positive regulation of peptidyl-threonine phosphory…	rno04371,rno04068,rno04152,rno04530,rno04910,rno04922,rno04920,rno04921,rno04211,rno04213,rno04710,rno04714,rno05410,rno04932,rno04931	Apelin signaling pathway|FoxO signaling pathway|AMPK signaling pathway|Tight junction|Insulin signaling pathway|Glucagon signaling pathway|Adipocytokine signaling pathway|Oxytocin signaling pathway|Longevity regulating pathway - mammal|Longevity regulating pathway - multiple species|Circadian rhythm|Thermogenesis|Hypertrophic cardiomyopathy (HCM)|Non-alcoholic fatty liver disease (NAFLD)|Insulin …
NONRATT021094.2	0.169699	-2.55895	0.00230299	Down	Chr4	6670353	6673645	-	XM_017592730.1	0	antisense	genic	intronic	nested	Prkag2	GeneID:373545,Genbank:XM_017592730.1,RGD:727782	protein kinase AMP-activated non-catalytic subunit gamma 2, transcript variant X2	GO:0031588,GO:0005524,GO:0005977,GO:0032147,GO:0006110,GO:0006468,GO:0006469,GO:0008603,GO:0008607,GO:0035556,GO:0010800,GO:0043531,GO:0016208,GO:0045860,GO:0019217,GO:0050790,GO:0019901,GO:0004679,GO:0071901,GO:0030295,GO:0004862	nucleotide-activated protein kinase complex|ATP binding|glycogen metabolic process|activation of protein kinase activity|regulation of glycolytic process|protein phosphorylation|negative regulation of protein kinase activity|cAMP-dependent protein kinase regulator activity|phosphorylase kinase regulator activity|intracellular signal transduction|positive regulation of peptidyl-threonine phosphory…	rno04371,rno04068,rno04152,rno04530,rno04910,rno04922,rno04920,rno04921,rno04211,rno04213,rno04710,rno04714,rno05410,rno04932,rno04931	Apelin signaling pathway|FoxO signaling pathway|AMPK signaling pathway|Tight junction|Insulin signaling pathway|Glucagon signaling pathway|Adipocytokine signaling pathway|Oxytocin signaling pathway|Longevity regulating pathway - mammal|Longevity regulating pathway - multiple species|Circadian rhythm|Thermogenesis|Hypertrophic cardiomyopathy (HCM)|Non-alcoholic fatty liver disease (NAFLD)|Insulin …
NONRATT021115.2	2.59636	1.37649	0.00415305	Up	Chr4	7818642	7822858	-	NM_001135174.1	13091	antisense	intergenic	upstream	divergent	Tomm7	GeneID:685620,Genbank:NM_001135174.1,RGD:1591393	translocase of outer mitochondrial membrane 7	GO:0005742,GO:0008150,GO:0030150,GO:0031307,GO:0031647,GO:0045040,GO:0098779,GO:1903955,GO:0003674,GO:0005575,GO:0005739	mitochondrial outer membrane translocase complex|biological_process|protein import into mitochondrial matrix|integral component of mitochondrial outer membrane|regulation of protein stability|protein import into mitochondrial outer membrane|positive regulation of mitophagy in response to mitochondrial depolarization|positive regulation of protein targeting to mitochondrion|molecular_function|cell…	rno04137	Mitophagy - animal
NONRATT021225.2	0.369686	-1.43563	0.0170933	Down	Chr4	32334051	32371594	-	XM_008762741.2	1502	antisense	intergenic	upstream	divergent	Dlx6	GeneID:500023,Genbank:XM_008762741.2,RGD:1561539	distal-less homeobox 6, transcript variant X1	GO:0048646,GO:0050679,GO:0060021,GO:0060322,GO:0030326,GO:0030855,GO:0042472	anatomical structure formation involved in morphogenesis|positive regulation of epithelial cell proliferation|roof of mouth development|head development|embryonic limb morphogenesis|epithelial cell differentiation|inner ear morphogenesis
NONRATT021264.2	0.356557	-1.4878	0.0351312	Down	Chr4	50421533	50421926	-	XM_017592958.1	0	sense	genic	intronic	nested	Cadps2	GeneID:312166,Genbank:XM_017592958.1,RGD:1559440	calcium dependent secretion activator 2, transcript variant X3	GO:0009267,GO:0016082,GO:0031410,GO:0042734,GO:0043231,GO:0045211,GO:0045921,GO:1990504,GO:0005654,GO:0008021	cellular response to starvation|synaptic vesicle priming|cytoplasmic vesicle|presynaptic membrane|intracellular membrane-bounded organelle|postsynaptic membrane|positive regulation of exocytosis|dense core granule exocytosis|nucleoplasm|synaptic vesicle
NONRATT021275.2	0.172905	-2.53195	6.02776e-07	Down	Chr4	52345600	52347008	-	NM_001109480.1	0	sense	genic	exonic	overlapping	Tmem229a	GeneID:685756,Genbank:NM_001109480.1,RGD:1590212	transmembrane protein 229A	GO:0016021	integral component of membrane
NONRATT021277.2	0.466213	-1.10094	0.0354123	Down	Chr4	52349905	52350583	-	NM_001109480.1	0	sense	genic	exonic	nested	Tmem229a	GeneID:685756,Genbank:NM_001109480.1,RGD:1590212	transmembrane protein 229A	GO:0016021	integral component of membrane
NONRATT021491.2	2.03694	1.02641	0.0341193	Up	Chr4	100221870	100223870	-	NM_001007647.1	0	sense	genic	exonic	overlapping	Rnf181	GeneID:297337,Genbank:NM_001007647.1,RGD:1359698	ring finger protein 181	GO:0046872,GO:0051865,GO:0061630,GO:0000209,GO:0004842,GO:0043161	metal ion binding|protein autoubiquitination|ubiquitin protein ligase activity|protein polyubiquitination|ubiquitin-protein transferase activity|proteasome-mediated ubiquitin-dependent protein catabolic process
NONRATT021498.2	9.82058	3.29581	0.0383285	Up	Chr4	100298224	100298676	-	NM_134351.1	0	sense	genic	exonic	nested	Mat2a	GeneID:171347,Genbank:NM_134351.1,RGD:619985	methionine adenosyltransferase 2A	GO:1990830,GO:0048269,GO:0009725,GO:0004478,GO:0016597,GO:0034214,GO:0005524,GO:0005829,GO:0006556,GO:0051291,GO:0042493,GO:0042802,GO:0006730,GO:0051591,GO:0007623,GO:0046872,GO:0009416	cellular response to leukemia inhibitory factor|methionine adenosyltransferase complex|response to hormone|methionine adenosyltransferase activity|amino acid binding|protein hexamerization|ATP binding|cytosol|S-adenosylmethionine biosynthetic process|protein heterooligomerization|response to drug|identical protein binding|one-carbon metabolic process|response to cAMP|circadian rhythm|metal ion bi…	rno00270	Cysteine and methionine metabolism
NONRATT021521.2	0.210935	-2.24513	0.00844699	Down	Chr4	113883941	113885797	-	NM_001106599.2	0	sense	genic	exonic	nested	Htra2	GeneID:297376,Genbank:NM_001106599.2,RGD:1308906	HtrA serine peptidase 2	GO:0006508,GO:0006672,GO:0007005,GO:0007568,GO:0007628,GO:0008233,GO:0008236,GO:0035631,GO:0040014,GO:0008344,GO:0042802,GO:0008630,GO:0043065,GO:0043280,GO:0044257,GO:0048666,GO:0060548,GO:0070207,GO:0000785,GO:0004252,GO:0005634,GO:0005739,GO:0005758,GO:0005829,GO:0005856,GO:0009635,GO:0009898,GO:0010822,GO:0010942,GO:0016020,GO:0019742,GO:0030900,GO:0071300,GO:0034599,GO:0071363,GO:0034605,GO:…	proteolysis|ceramide metabolic process|mitochondrion organization|aging|adult walking behavior|peptidase activity|serine-type peptidase activity|CD40 receptor complex|regulation of multicellular organism growth|adult locomotory behavior|identical protein binding|intrinsic apoptotic signaling pathway in response to DNA damage|positive regulation of apoptotic process|positive regulation of cysteine…	rno04210,rno04215,rno05012	Apoptosis|Apoptosis - multiple species|Parkinson's disease
NONRATT021584.2	0.169874	-2.55746	0.0266389	Down	Chr4	119429377	119429694	-	XM_017592495.1	28608	sense	intergenic	upstream	same_strand	Vom1r101	GeneID:286892,Genbank:XM_017592495.1,RGD:708395	vomeronasal 1 receptor 101, transcript variant X1	GO:0016021,GO:0016503,GO:0019236,GO:0005886,GO:0007186,GO:0007606	integral component of membrane|pheromone receptor activity|response to pheromone|plasma membrane|G-protein coupled receptor signaling pathway|sensory perception of chemical stimulus
NONRATT021694.2	0.348043	-1.52266	0.000637582	Down	Chr4	144634794	144636302	-	XM_006237048.3	2480	sense	intergenic	downstream	same_strand	Srgap3	GeneID:500287,Genbank:XM_006237048.3,RGD:1563152	SLIT-ROBO Rho GTPase activating protein 3, transcript variant X1	GO:0030336,GO:0043547,GO:0048365,GO:0005096,GO:0005737,GO:0007165	negative regulation of cell migration|positive regulation of GTPase activity|Rac GTPase binding|GTPase activator activity|cytoplasm|signal transduction	rno04360	Axon guidance
NONRATT021696.2	0.377614	-1.40502	0.00233254	Down	Chr4	144636470	144637891	-	XM_006237048.3	891	sense	intergenic	downstream	same_strand	Srgap3	GeneID:500287,Genbank:XM_006237048.3,RGD:1563152	SLIT-ROBO Rho GTPase activating protein 3, transcript variant X1	GO:0030336,GO:0043547,GO:0048365,GO:0005096,GO:0005737,GO:0007165	negative regulation of cell migration|positive regulation of GTPase activity|Rac GTPase binding|GTPase activator activity|cytoplasm|signal transduction	rno04360	Axon guidance
NONRATT021728.2	0.476203	-1.07035	0.042486	Down	Chr4	147918116	147918647	-	XM_017593028.1	2340	sense	intergenic	downstream	same_strand	Tmcc1	GeneID:312654,Genbank:XM_017593028.1,RGD:1311909	transmembrane and coiled-coil domain family 1, transcript variant X4	GO:0012505,GO:0016021,GO:0042803,GO:0046982,GO:0051260,GO:0051291,GO:0005791,GO:0005829,GO:0007029	endomembrane system|integral component of membrane|protein homodimerization activity|protein heterodimerization activity|protein homooligomerization|protein heterooligomerization|rough endoplasmic reticulum|cytosol|endoplasmic reticulum organization
NONRATT021867.2	4.12233	2.04346	0.0272731	Up	Chr4	161540106	161541029	-	XM_006237424.3	1537	sense	intergenic	downstream	same_strand	Tead4	GeneID:683522,Genbank:XM_006237424.3,RGD:1585671	TEA domain transcription factor 4, transcript variant X1	GO:0045165,GO:0006357,GO:0001701,GO:0045944,GO:0006366,GO:0001708,GO:0007566,GO:0001825,GO:0048568,GO:0001830,GO:0003677,GO:0003700,GO:0032993,GO:0005634,GO:1902459,GO:0035329,GO:0005654,GO:0043565,GO:0005667,GO:0000978,GO:0001077,GO:0044212,GO:0005737,GO:0001085	cell fate commitment|regulation of transcription by RNA polymerase II|in utero embryonic development|positive regulation of transcription by RNA polymerase II|transcription by RNA polymerase II|cell fate specification|embryo implantation|blastocyst formation|embryonic organ development|trophectodermal cell fate commitment|DNA binding|DNA binding transcription factor activity|protein-DNA complex|n…	rno04390,rno04392	Hippo signaling pathway|Hippo signaling pathway - multiple species
NONRATT021974.2	6.74187	2.75315	6.10707e-06	Up	Chr4	179515887	179516419	-	XM_017592442.1	405	sense	intergenic	upstream	same_strand	Kras	GeneID:24525,Genbank:XM_017592442.1,RGD:2981	Kirsten rat sarcoma viral oncogene, transcript variant X1	GO:0007265,GO:0007565,GO:0008284,GO:0008542,GO:0010628,GO:0016020,GO:0038002,GO:0019002,GO:0042802,GO:0019003,GO:0043406,GO:0019221,GO:0043524,GO:0045121,GO:0045596,GO:0048169,GO:0048873,GO:0051000,GO:0051092,GO:0001889,GO:0001934,GO:0003924,GO:0005515,GO:0005525,GO:0005737,GO:0005739,GO:0005829,GO:0005886,GO:0021897,GO:0030036,GO:0030275,GO:0031234,GO:0031647,GO:0051146,GO:0032228,GO:0051384,GO:…	Ras protein signal transduction|female pregnancy|positive regulation of cell proliferation|visual learning|positive regulation of gene expression|membrane|endocrine signaling|GMP binding|identical protein binding|GDP binding|positive regulation of MAP kinase activity|cytokine-mediated signaling pathway|negative regulation of neuron apoptotic process|membrane raft|negative regulation of cell diffe…	rno04014,rno04015,rno04010,rno04012,rno04370,rno04371,rno04068,rno04072,rno04071,rno04151,rno04150,rno04140,rno04137,rno04210,rno04218,rno04540,rno04550,rno04810,rno04625,rno04650,rno04660,rno04662,rno04664,rno04062,rno04910,rno04912,rno04915,rno04914,rno04917,rno04921,rno04926,rno04919,rno04916,rno04960,rno04725,rno04726,rno04720,rno04730,rno04722,rno04360,rno04211,rno04213,rno04714,rno05200,rno…	Ras signaling pathway|Rap1 signaling pathway|MAPK signaling pathway|ErbB signaling pathway|VEGF signaling pathway|Apelin signaling pathway|FoxO signaling pathway|Phospholipase D signaling pathway|Sphingolipid signaling pathway|PI3K-Akt signaling pathway|mTOR signaling pathway|Autophagy - animal|Mitophagy - animal|Apoptosis|Cellular senescence|Gap junction|Signaling pathways regulating pluripotenc…
NONRATT021997.2	0.468209	-1.09477	0.0499589	Down	Chr5	74368	152115	+	XM_017593899.1	0	sense	genic	exonic	overlapping	LOC103692273	GeneID:103692273,Genbank:XM_017593899.1,RGD:9461229	zinc finger protein 431-like
NONRATT022022.2	0.412083	-1.27899	0.0185956	Down	Chr5	4513520	4515112	+	XM_017593676.1	17996	sense	intergenic	downstream	same_strand	Eya1	GeneID:502935,Genbank:XM_017593676.1,RGD:1584849	EYA transcriptional coactivator and phosphatase 1, transcript variant X3	GO:0005575,GO:0005634,GO:0005654,GO:0005737,GO:0006302,GO:0006470,GO:0034613,GO:0007389,GO:0035088,GO:0007501,GO:0035909,GO:0008150,GO:0042472,GO:0042473,GO:0042474,GO:0045165,GO:0060487,GO:0045664,GO:0071599,GO:0045739,GO:0071600,GO:0072513,GO:0090103,GO:2001240,GO:0000132,GO:0001656,GO:0001657,GO:0001658,GO:0003151,GO:0003674,GO:0003723,GO:0004725,GO:0009887,GO:0010212,GO:0014706,GO:0016576,GO:…	cellular_component|nucleus|nucleoplasm|cytoplasm|double-strand break repair|protein dephosphorylation|cellular protein localization|pattern specification process|establishment or maintenance of apical/basal cell polarity|mesodermal cell fate specification|aorta morphogenesis|biological_process|inner ear morphogenesis|outer ear morphogenesis|middle ear morphogenesis|cell fate commitment|lung epith…	rno05202	Transcriptional misregulation in cancers
NONRATT022089.2	Inf	Inf	0.00470062	Up	Chr5	22380373	22392853	+	NM_001108969.1	0	sense	genic	exonic	nested	Clvs1	GeneID:366311,Genbank:NM_001108969.1,RGD:1564200	clavesin 1	GO:0005802,GO:0007040,GO:0030136,GO:0031901,GO:0080025,GO:0005768	trans-Golgi network|lysosome organization|clathrin-coated vesicle|early endosome membrane|phosphatidylinositol-3,5-bisphosphate binding|endosome
NONRATT022127.2	3.02709	1.59793	0.000371448	Up	Chr5	29798959	29810662	+	XM_006237922.2	0	sense	genic	exonic	nested	Ube2w	GeneID:100909445,Genbank:XM_006237922.2,RGD:6503620	ubiquitin-conjugating enzyme E2W, transcript variant X1	GO:0043161,GO:0005524,GO:0005634,GO:0005730,GO:0005737,GO:0006281,GO:0061630,GO:0006513,GO:0061631,GO:0070979,GO:0006515,GO:0071218,GO:0000209,GO:0031625,GO:0004842	proteasome-mediated ubiquitin-dependent protein catabolic process|ATP binding|nucleus|nucleolus|cytoplasm|DNA repair|ubiquitin protein ligase activity|protein monoubiquitination|ubiquitin conjugating enzyme activity|protein K11-linked ubiquitination|protein quality control for misfolded or incompletely synthesized proteins|cellular response to misfolded protein|protein polyubiquitination|ubiquiti…	rno04120	Ubiquitin mediated proteolysis
NONRATT022147.2	0.314082	-1.67079	0.000636342	Down	Chr5	36684567	36688935	+	NM_172085.2	1212	antisense	intergenic	upstream	divergent	Pou3f2	GeneID:29588,Genbank:NM_172085.2,RGD:61946	POU class 3 homeobox 2	GO:0003700,GO:0005515,GO:0005634,GO:0014002,GO:0005667,GO:0014044,GO:0006355,GO:0021799,GO:0021869,GO:0043565,GO:0021979,GO:0045595,GO:0045944,GO:0021985,GO:0048663,GO:0048665,GO:0000978,GO:0001077,GO:0048666,GO:0001105,GO:0003677,GO:0006357,GO:0006366,GO:0007399,GO:0008284,GO:0008544,GO:0022011,GO:0010629,GO:0030182,GO:0040018,GO:0042802,GO:0050770,GO:0071310,GO:0071837	DNA binding transcription factor activity|protein binding|nucleus|astrocyte development|transcription factor complex|Schwann cell development|regulation of transcription, DNA-templated|cerebral cortex radially oriented cell migration|forebrain ventricular zone progenitor cell division|sequence-specific DNA binding|hypothalamus cell differentiation|regulation of cell differentiation|positive regul…
NONRATT022152.2	5.47175	2.452	0.0127527	Up	Chr5	38844525	38850520	+	XM_006237954.3	0	sense	genic	exonic	nested	Mms22l	GeneID:313108,Genbank:XM_006237954.3,RGD:1304693	MMS22-like, DNA repair protein, transcript variant X1	GO:0005829,GO:0031297,GO:0035101,GO:0042555,GO:0043596,GO:0000724,GO:0005654	cytosol|replication fork processing|FACT complex|MCM complex|nuclear replication fork|double-strand break repair via homologous recombination|nucleoplasm
NONRATT022179.2	2.3086	1.20702	0.00758487	Up	Chr5	50120611	50122570	+	XM_006237996.3	0	antisense	genic	exonic	nested	Slc35a1	GeneID:313139,Genbank:XM_006237996.3,RGD:1311359	solute carrier family 35 member A1, transcript variant X1	GO:0090481,GO:0000139,GO:0015165,GO:0016021	pyrimidine nucleotide-sugar transmembrane transport|Golgi membrane|pyrimidine nucleotide-sugar transmembrane transporter activity|integral component of membrane
NONRATT022194.2	4.91065	2.29591	3.13949e-06	Up	Chr5	57312564	57333205	+	XM_008763623.2	0	sense	genic	exonic	nested	Nfx1	GeneID:313166,Genbank:XM_008763623.2,RGD:1310277	nuclear transcription factor, X-box binding 1, transcript variant X1	GO:0008270,GO:0000977,GO:0045347,GO:0001078,GO:0005634,GO:0005730,GO:0005829,GO:0005886,GO:0000122,GO:0006366	zinc ion binding|RNA polymerase II regulatory region sequence-specific DNA binding|negative regulation of MHC class II biosynthetic process|transcriptional repressor activity, RNA polymerase II proximal promoter sequence-specific DNA binding|nucleus|nucleolus|cytosol|plasma membrane|negative regulation of transcription by RNA polymerase II|transcription by RNA polymerase II	rno05165	Human papillomavirus infection
NONRATT022229.2	2.0213	1.01528	0.0236862	Up	Chr5	59446870	59448053	+	XM_006238140.3	139	sense	intergenic	downstream	same_strand	Glipr2	GeneID:679819,Genbank:XM_006238140.3,RGD:1583669	GLI pathogenesis-related 2, transcript variant X1	GO:0010718,GO:0042803,GO:0070374,GO:0000139,GO:0005615,GO:0010634	positive regulation of epithelial to mesenchymal transition|protein homodimerization activity|positive regulation of ERK1 and ERK2 cascade|Golgi membrane|extracellular space|positive regulation of epithelial cell migration
NONRATT022292.2	0.0266956	-5.22725	0.00142793	Down	Chr5	74655340	74727613	+	NM_001305995.1	0	sense	genic	exonic	nested	Palm2	GeneID:103692368,Genbank:NM_001305995.1,RGD:6497336	paralemmin 2	GO:0007178,GO:0008150,GO:0008360,GO:0016020,GO:0023052,GO:0051018,GO:0003674,GO:0005575,GO:0007015	transmembrane receptor protein serine/threonine kinase signaling pathway|biological_process|regulation of cell shape|membrane|signaling|protein kinase A binding|molecular_function|cellular_component|actin filament organization
NONRATT022322.2	0.124931	-3.00079	0.0109899	Down	Chr5	78563867	78565306	+	XM_017593600.1	0	sense	genic	exonic	nested	Rgs3	GeneID:54293,Genbank:XM_017593600.1,RGD:3566	regulator of G-protein signaling 3, transcript variant X12	GO:0005654,GO:0005737,GO:0005829,GO:0005886,GO:0007165,GO:0009968,GO:0043547,GO:0005096,GO:0005634	nucleoplasm|cytoplasm|cytosol|plasma membrane|signal transduction|negative regulation of signal transduction|positive regulation of GTPase activity|GTPase activator activity|nucleus	rno04360	Axon guidance
NONRATT022346.2	0.26771	-1.90126	0.000707411	Down	Chr5	100650511	100688184	+	XM_006238336.3	2550	antisense	intergenic	upstream	divergent	Nfib	GeneID:29227,Genbank:XM_006238336.3,RGD:62015	nuclear factor I/B, transcript variant X5	GO:0001650,GO:0002062,GO:0003677,GO:0003690,GO:0030324,GO:0005634,GO:0030900,GO:0030902,GO:0043392,GO:0044300,GO:0045892,GO:0061141,GO:0045893,GO:0071679,GO:0045944,GO:1902894,GO:2000791,GO:0000122,GO:2000795,GO:0000978,GO:0000981,GO:0001077,GO:0001106,GO:0006260,GO:0006366,GO:0007608,GO:0008285,GO:0010001,GO:0021740,GO:0021960,GO:0060486,GO:0060509,GO:0060510,GO:0060662,GO:0060689	fibrillar center|chondrocyte differentiation|DNA binding|double-stranded DNA binding|lung development|nucleus|forebrain development|hindbrain development|negative regulation of DNA binding|cerebellar mossy fiber|negative regulation of transcription, DNA-templated|lung ciliated cell differentiation|positive regulation of transcription, DNA-templated|commissural neuron axon guidance|positive regula…
NONRATT022400.2	0.468609	-1.09354	0.0272647	Down	Chr5	116754769	116755922	+	NM_012988.2	4389	sense	intergenic	downstream	same_strand	Nfia	GeneID:25492,Genbank:NM_012988.2,RGD:3170	nuclear factor I/A	GO:0072189,GO:0014070,GO:0005634,GO:0000981,GO:0030054,GO:0005654,GO:0001077,GO:0045893,GO:0003677,GO:0003682,GO:0006260,GO:0045944,GO:0006351,GO:0003700,GO:0006355,GO:0005515,GO:0006366,GO:0000122,GO:0060074,GO:0008134,GO:0000978	ureter development|response to organic cyclic compound|nucleus|RNA polymerase II transcription factor activity, sequence-specific DNA binding|cell junction|nucleoplasm|transcriptional activator activity, RNA polymerase II proximal promoter sequence-specific DNA binding|positive regulation of transcription, DNA-templated|DNA binding|chromatin binding|DNA replication|positive regulation of transcri…
NONRATT022432.2	5.25503	2.3937	2.03052e-07	Up	Chr5	122120431	122121756	+	NM_017031.2	0	sense	genic	exonic	nested	Pde4b	GeneID:24626,Genbank:NM_017031.2,RGD:3280	phosphodiesterase 4B	GO:0005737,GO:0005813,GO:0005829,GO:0005891,GO:0030552,GO:0006198,GO:0030593,GO:0032729,GO:0032743,GO:0060076,GO:0035690,GO:0071222,GO:0071872,GO:0071944,GO:0000930,GO:0086004,GO:1901841,GO:0001780,GO:1901898,GO:0004114,GO:0004115,GO:0005634,GO:0006939,GO:0007165,GO:0008021,GO:0014069,GO:0043015,GO:0016020,GO:0043197,GO:0030018,GO:0044325,GO:0046872,GO:0048471,GO:0050852,GO:0050900	cytoplasm|centrosome|cytosol|voltage-gated calcium channel complex|cAMP binding|cAMP catabolic process|neutrophil chemotaxis|positive regulation of interferon-gamma production|positive regulation of interleukin-2 production|excitatory synapse|cellular response to drug|cellular response to lipopolysaccharide|cellular response to epinephrine stimulus|cell periphery|gamma-tubulin complex|regulation …	rno00230,rno04024,rno05032	Purine metabolism|cAMP signaling pathway|Morphine addiction
NONRATT022438.2	3.4213	1.77455	0.0407065	Up	Chr5	122499632	122512897	+	XM_008763889.2	0	sense	genic	exonic	overlapping	Tctex1d1	GeneID:362553,Genbank:XM_008763889.2,RGD:1311932	Tctex1 domain containing 1, transcript variant X2
NONRATT022448.2	0.218479	-2.19443	0.0462129	Down	Chr5	126800412	126803670	+	NM_001139465.2	0	sense	genic	exonic	nested	Tmem59	GeneID:100196907,Genbank:NM_001139465.2,RGD:1310313	transmembrane protein 59	GO:0005764,GO:0005770,GO:0005797,GO:0006508,GO:0010508,GO:0010955,GO:0016021,GO:0090285,GO:1903077,GO:0000137,GO:0000138,GO:0004175	lysosome|late endosome|Golgi medial cisterna|proteolysis|positive regulation of autophagy|negative regulation of protein processing|integral component of membrane|negative regulation of protein glycosylation in Golgi|negative regulation of protein localization to plasma membrane|Golgi cis cisterna|Golgi trans cisterna|endopeptidase activity
NONRATT022480.2	Inf	Inf	0.000670889	Up	Chr5	128693636	128693900	+	XM_006238499.3	0	sense	genic	exonic	nested	Nrdc	GeneID:25499,Genbank:XM_006238499.3,RGD:3210	nardilysin convertase, transcript variant X1	GO:0005829,GO:0006508,GO:0008233,GO:0043171,GO:0046872,GO:0051044,GO:0051603,GO:0052548,GO:0004222,GO:0005739	cytosol|proteolysis|peptidase activity|peptide catabolic process|metal ion binding|positive regulation of membrane protein ectodomain proteolysis|proteolysis involved in cellular protein catabolic process|regulation of endopeptidase activity|metalloendopeptidase activity|mitochondrion
NONRATT022566.2	3.40703	1.76851	0.0249967	Up	Chr5	138042652	138043140	+	XM_003750018.3	0	sense	genic	exonic	containing	LOC100910768	GeneID:100910768,Genbank:XM_003750018.3,RGD:6496493	ubiquitin-40S ribosomal protein S27a-like
NONRATT022567.2	3.76585	1.91297	0.000480174	Up	Chr5	138185127	138186004	+	NM_138827.1	2231	sense	intergenic	downstream	same_strand	Slc2a1	GeneID:24778,Genbank:NM_138827.1,RGD:3704	solute carrier family 2 member 1	GO:0005886,GO:0005887,GO:0005901,GO:0005911,GO:0006970,GO:0032868,GO:0007565,GO:0033300,GO:0014704,GO:0016020,GO:0042149,GO:0042383,GO:0042470,GO:0071474,GO:0042802,GO:1904016,GO:0042908,GO:1904659,GO:0042910,GO:0001939,GO:0005355,GO:0005515,GO:0005622,GO:0005737,GO:0005829,GO:0016021,GO:0016323,GO:0016324,GO:0019900,GO:0021987,GO:0030018,GO:0030496,GO:0043621,GO:0030864,GO:0045121,GO:0031982,GO:…	plasma membrane|integral component of plasma membrane|caveola|cell-cell junction|response to osmotic stress|response to insulin|female pregnancy|dehydroascorbic acid transmembrane transporter activity|intercalated disc|membrane|cellular response to glucose starvation|sarcolemma|melanosome|cellular hyperosmotic response|identical protein binding|response to Thyroglobulin triiodothyronine|xenobioti…	rno04066,rno04911,rno04922,rno04920,rno04919,rno04976,rno05200,rno05230,rno05211,rno04931,rno05166	HIF-1 signaling pathway|Insulin secretion|Glucagon signaling pathway|Adipocytokine signaling pathway|Thyroid hormone signaling pathway|Bile secretion|Pathways in cancer|Central carbon metabolism in cancer|Renal cell carcinoma|Insulin resistance|HTLV-I infection
NONRATT022568.2	3.07637	1.62123	0.00399167	Up	Chr5	138188803	138189470	+	NM_138827.1	5907	sense	intergenic	downstream	same_strand	Slc2a1	GeneID:24778,Genbank:NM_138827.1,RGD:3704	solute carrier family 2 member 1	GO:0005886,GO:0005887,GO:0005901,GO:0005911,GO:0006970,GO:0032868,GO:0007565,GO:0033300,GO:0014704,GO:0016020,GO:0042149,GO:0042383,GO:0042470,GO:0071474,GO:0042802,GO:1904016,GO:0042908,GO:1904659,GO:0042910,GO:0001939,GO:0005355,GO:0005515,GO:0005622,GO:0005737,GO:0005829,GO:0016021,GO:0016323,GO:0016324,GO:0019900,GO:0021987,GO:0030018,GO:0030496,GO:0043621,GO:0030864,GO:0045121,GO:0031982,GO:…	plasma membrane|integral component of plasma membrane|caveola|cell-cell junction|response to osmotic stress|response to insulin|female pregnancy|dehydroascorbic acid transmembrane transporter activity|intercalated disc|membrane|cellular response to glucose starvation|sarcolemma|melanosome|cellular hyperosmotic response|identical protein binding|response to Thyroglobulin triiodothyronine|xenobioti…	rno04066,rno04911,rno04922,rno04920,rno04919,rno04976,rno05200,rno05230,rno05211,rno04931,rno05166	HIF-1 signaling pathway|Insulin secretion|Glucagon signaling pathway|Adipocytokine signaling pathway|Thyroid hormone signaling pathway|Bile secretion|Pathways in cancer|Central carbon metabolism in cancer|Renal cell carcinoma|Insulin resistance|HTLV-I infection
NONRATT022594.2	3.92778	1.97371	0.000484774	Up	Chr5	140487504	140487949	+	NM_022502.2	50311	sense	intergenic	upstream	same_strand	Ppt1	GeneID:29411,Genbank:NM_022502.2,RGD:61994	palmitoyl-protein thioesterase 1	GO:0005764,GO:0005794,GO:0005829,GO:0006898,GO:0008021,GO:0006907,GO:0007040,GO:0008306,GO:0008344,GO:0008474,GO:0031579,GO:0015031,GO:0032429,GO:0043005,GO:0043025,GO:0043066,GO:0002084,GO:0048549,GO:0051181,GO:0043231,GO:0043524,GO:0005576,GO:0051186,GO:0005615,GO:0005634,GO:0007042,GO:0007269,GO:0007399,GO:0007420,GO:0016042,GO:0007601,GO:0016290,GO:0007625,GO:0016790,GO:0030308,GO:0030424,GO:…	lysosome|Golgi apparatus|cytosol|receptor-mediated endocytosis|synaptic vesicle|pinocytosis|lysosome organization|associative learning|adult locomotory behavior|palmitoyl-(protein) hydrolase activity|membrane raft organization|protein transport|regulation of phospholipase A2 activity|neuron projection|neuronal cell body|negative regulation of apoptotic process|protein depalmitoylation|positive re…	rno00062,rno04142	Fatty acid elongation|Lysosome
NONRATT022641.2	0.468257	-1.09463	0.012792	Down	Chr5	145304144	145304535	+	NM_173138.4	0	sense	genic	exonic	nested	Dlgap3	GeneID:286923,Genbank:NM_173138.4,RGD:708349	DLG associated protein 3, transcript variant 1	GO:0065003,GO:0005886,GO:0097110,GO:0014069,GO:0017146,GO:0019904,GO:0023052,GO:0030054,GO:0030165,GO:0032947,GO:0043025,GO:0043197,GO:0045202,GO:0001540,GO:0045211,GO:0005515	protein-containing complex assembly|plasma membrane|scaffold protein binding|postsynaptic density|NMDA selective glutamate receptor complex|protein domain specific binding|signaling|cell junction|PDZ domain binding|protein-containing complex scaffold activity|neuronal cell body|dendritic spine|synapse|amyloid-beta binding|postsynaptic membrane|protein binding
NONRATT022652.2	16.5001	4.0444	3.16412e-07	Up	Chr5	146933586	146941224	+	NM_138524.2	0	sense	genic	exonic	overlapping	A3galt2	GeneID:171553,Genbank:NM_138524.2,RGD:727913	alpha 1,3-galactosyltransferase 2	GO:0046872,GO:0005794,GO:0047276,GO:0005975,GO:0006688,GO:0016021,GO:0016757,GO:0030259,GO:0031982,GO:0001962,GO:0032580,GO:0033580	metal ion binding|Golgi apparatus|N-acetyllactosaminide 3-alpha-galactosyltransferase activity|carbohydrate metabolic process|glycosphingolipid biosynthetic process|integral component of membrane|transferase activity, transferring glycosyl groups|lipid glycosylation|vesicle|alpha-1,3-galactosyltransferase activity|Golgi cisterna membrane|protein galactosylation at cell surface	rno00603	Glycosphingolipid biosynthesis - globo and isoglobo series
NONRATT022653.2	4.10084	2.03592	8.1653e-05	Up	Chr5	146946732	146947772	+	NM_138524.2	851	sense	intergenic	downstream	same_strand	A3galt2	GeneID:171553,Genbank:NM_138524.2,RGD:727913	alpha 1,3-galactosyltransferase 2	GO:0046872,GO:0005794,GO:0047276,GO:0005975,GO:0006688,GO:0016021,GO:0016757,GO:0030259,GO:0031982,GO:0001962,GO:0032580,GO:0033580	metal ion binding|Golgi apparatus|N-acetyllactosaminide 3-alpha-galactosyltransferase activity|carbohydrate metabolic process|glycosphingolipid biosynthetic process|integral component of membrane|transferase activity, transferring glycosyl groups|lipid glycosylation|vesicle|alpha-1,3-galactosyltransferase activity|Golgi cisterna membrane|protein galactosylation at cell surface	rno00603	Glycosphingolipid biosynthesis - globo and isoglobo series
NONRATT022668.2	3.92392	1.9723	0.000856322	Up	Chr5	148296495	148311645	+	XM_006238950.3	0	sense	genic	exonic	nested	Col16a1	GeneID:366474,Genbank:XM_006238950.3,RGD:1310982	collagen type XVI alpha 1 chain, transcript variant X5	GO:0033622,GO:0033627,GO:0051894,GO:0071230,GO:0005178,GO:0007155,GO:0031012	integrin activation|cell adhesion mediated by integrin|positive regulation of focal adhesion assembly|cellular response to amino acid stimulus|integrin binding|cell adhesion|extracellular matrix
NONRATT022734.2	4.64713	2.21634	0.0130176	Up	Chr5	153532200	153533094	+	NM_130425.1	1064	sense	intergenic	downstream	same_strand	Runx3	GeneID:156726,Genbank:NM_130425.1,RGD:620082	runt-related transcription factor 3	GO:0050680,GO:0031069,GO:0005737,GO:0000981,GO:0071559,GO:0031175,GO:0005829,GO:2001238,GO:0032609,GO:0001503,GO:0042789,GO:0002062,GO:0003674,GO:0003677,GO:0006357,GO:0005524,GO:0043231,GO:0006468,GO:0005575,GO:0045595,GO:0007411,GO:0005634,GO:0045786,GO:0008150,GO:0000122,GO:0045893,GO:0030097,GO:0005730,GO:0000790,GO:0048469,GO:0030182,GO:0000977	negative regulation of epithelial cell proliferation|hair follicle morphogenesis|cytoplasm|RNA polymerase II transcription factor activity, sequence-specific DNA binding|response to transforming growth factor beta|neuron projection development|cytosol|positive regulation of extrinsic apoptotic signaling pathway|interferon-gamma production|ossification|mRNA transcription by RNA polymerase II|chond…	rno04658	Th1 and Th2 cell differentiation
NONRATT022969.2	17.8349	4.15663	0.000777602	Up	Chr5	786864	787840	-	NM_001106917.1	3297	sense	intergenic	downstream	same_strand	Pi15	GeneID:301489,Genbank:NM_001106917.1,RGD:1309577	peptidase inhibitor 15	GO:0005615,GO:0006508,GO:0008233	extracellular space|proteolysis|peptidase activity
NONRATT023004.2	0	#NAME?	0.0373279	Down	Chr5	9423651	9429717	-	NM_001025423.1	0	sense	genic	exonic	nested	Adhfe1	GeneID:362474,Genbank:NM_001025423.1,RGD:1308863	alcohol dehydrogenase, iron containing, 1	GO:0005739,GO:0005829,GO:0006539,GO:0008150,GO:0046872,GO:0047988,GO:0055114,GO:0003674,GO:0004022,GO:0005575	mitochondrion|cytosol|glutamate catabolic process via 2-oxoglutarate|biological_process|metal ion binding|hydroxyacid-oxoacid transhydrogenase activity|oxidation-reduction process|molecular_function|alcohol dehydrogenase (NAD) activity|cellular_component
NONRATT023036.2	0.401035	-1.3182	0.0173509	Down	Chr5	19892077	19894321	-	XM_006237844.3	0	sense	genic	exonic	overlapping	Tox	GeneID:362481,Genbank:XM_006237844.3,RGD:1310455	thymocyte selection-associated high mobility group box, transcript variant X3	GO:0005634,GO:0006338,GO:0006355,GO:0030098,GO:0032825,GO:0048535,GO:0048541,GO:0003677,GO:0003682	nucleus|chromatin remodeling|regulation of transcription, DNA-templated|lymphocyte differentiation|positive regulation of natural killer cell differentiation|lymph node development|Peyer's patch development|DNA binding|chromatin binding
NONRATT023068.2	0.088685	-3.49517	0.015917	Down	Chr5	25709246	25720989	-	NM_001107916.2	0	sense	genic	exonic	nested	Tmem67	GeneID:313067,Genbank:NM_001107916.2,RGD:1586167	transmembrane protein 67	GO:0060271,GO:0036038,GO:0030659,GO:0005813,GO:0048754,GO:1902857,GO:0051082,GO:0005886,GO:1904294,GO:0005929,GO:0005930,GO:0007368,GO:0007507,GO:0031005,GO:0010826,GO:0051787,GO:0060170,GO:0035845,GO:0035869,GO:0016021,GO:0005789,GO:0030433	cilium assembly|MKS complex|cytoplasmic vesicle membrane|centrosome|branching morphogenesis of an epithelial tube|positive regulation of non-motile cilium assembly|unfolded protein binding|plasma membrane|positive regulation of ERAD pathway|cilium|axoneme|determination of left/right symmetry|heart development|filamin binding|negative regulation of centrosome duplication|misfolded protein binding|…
NONRATT023106.2	0.157513	-2.66646	0.00121135	Down	Chr5	36679256	36680159	-	NM_172085.2	0	sense	genic	exonic	nested	Pou3f2	GeneID:29588,Genbank:NM_172085.2,RGD:61946	POU class 3 homeobox 2	GO:0003700,GO:0005515,GO:0005634,GO:0014002,GO:0005667,GO:0014044,GO:0006355,GO:0021799,GO:0021869,GO:0043565,GO:0021979,GO:0045595,GO:0045944,GO:0021985,GO:0048663,GO:0048665,GO:0000978,GO:0001077,GO:0048666,GO:0001105,GO:0003677,GO:0006357,GO:0006366,GO:0007399,GO:0008284,GO:0008544,GO:0022011,GO:0010629,GO:0030182,GO:0040018,GO:0042802,GO:0050770,GO:0071310,GO:0071837	DNA binding transcription factor activity|protein binding|nucleus|astrocyte development|transcription factor complex|Schwann cell development|regulation of transcription, DNA-templated|cerebral cortex radially oriented cell migration|forebrain ventricular zone progenitor cell division|sequence-specific DNA binding|hypothalamus cell differentiation|regulation of cell differentiation|positive regul…
NONRATT023109.2	39.9214	5.31909	0.0051894	Up	Chr5	39616443	39617522	-	XM_006237959.3	0	sense	genic	exonic	overlapping	Ufl1	GeneID:313115,Genbank:XM_006237959.3,RGD:1309308	Ufm1-specific ligase 1, transcript variant X1	GO:1990592,GO:0034976,GO:0005783,GO:0043005,GO:0005789,GO:0043066,GO:0005829,GO:0008284,GO:0010468,GO:0031397,GO:0060252,GO:0032088,GO:0071568,GO:0032434,GO:0071569,GO:0032880,GO:0005737,GO:0033146,GO:1902065	protein K69-linked ufmylation|response to endoplasmic reticulum stress|endoplasmic reticulum|neuron projection|endoplasmic reticulum membrane|negative regulation of apoptotic process|cytosol|positive regulation of cell proliferation|regulation of gene expression|negative regulation of protein ubiquitination|positive regulation of glial cell proliferation|negative regulation of NF-kappaB transcrip…
NONRATT023158.2	Inf	Inf	0.0150403	Up	Chr5	57901001	57947425	-	XM_006238100.3	0	sense	genic	exonic	nested	Fam219a	GeneID:691024,Genbank:XM_006238100.3,RGD:1588668	family with sequence similarity 219, member A, transcript variant X1
NONRATT023161.2	2.54871	1.34977	0.00316729	Up	Chr5	58122344	58124577	-	NM_030996.1	0	sense	genic	exonic	nested	Sigmar1	GeneID:29336,Genbank:NM_030996.1,RGD:68364	sigma non-opioid intracellular receptor 1	GO:0030426,GO:0005637,GO:0031410,GO:0005640,GO:0038003,GO:0005783,GO:0005789,GO:0005811,GO:0038023,GO:0006869,GO:0042802,GO:0007399,GO:0043523,GO:0014069,GO:0016021,GO:0004985,GO:0045211,GO:0005515,GO:0070207,GO:0030054,GO:0005635	growth cone|nuclear inner membrane|cytoplasmic vesicle|nuclear outer membrane|opioid receptor signaling pathway|endoplasmic reticulum|endoplasmic reticulum membrane|lipid droplet|signaling receptor activity|lipid transport|identical protein binding|nervous system development|regulation of neuron apoptotic process|postsynaptic density|integral component of membrane|opioid receptor activity|postsyn…
NONRATT023220.2	23.0657	4.52768	0.0207369	Up	Chr5	61692859	61693528	-	XM_006238089.2	0	sense	genic	exonic	overlapping	Tstd2	GeneID:362514,Genbank:XM_006238089.2,RGD:1310893	thiosulfate sulfurtransferase like domain containing 2, transcript variant X6	GO:0003674,GO:0005575,GO:0008150	molecular_function|cellular_component|biological_process
NONRATT023277.2	0.213512	-2.22761	0.00911604	Down	Chr5	75857676	75857948	-	NM_001000582.1	51503	sense	intergenic	downstream	same_strand	Olr854	GeneID:366377,Genbank:NM_001000582.1,RGD:1332920	olfactory receptor 854	GO:0005886,GO:0007186,GO:0007608,GO:0016021,GO:0050911,GO:0004930,GO:0004984	plasma membrane|G-protein coupled receptor signaling pathway|sensory perception of smell|integral component of membrane|detection of chemical stimulus involved in sensory perception of smell|G-protein coupled receptor activity|olfactory receptor activity	rno04740	Olfactory transduction
NONRATT023332.2	3.32232	1.73219	0.025424	Up	Chr5	92038215	92039002	-	NM_001206675.1	0	sense	genic	exonic	nested	Tmem261	GeneID:298147,Genbank:NM_001206675.1,RGD:1309148	transmembrane protein 261	GO:0032981,GO:0005743,GO:0005747,GO:0016021	mitochondrial respiratory chain complex I assembly|mitochondrial inner membrane|mitochondrial respiratory chain complex I|integral component of membrane
NONRATT023404.2	0.285675	-1.80755	0.0330715	Down	Chr5	116996926	117038684	-	XM_006238418.3	0	sense	genic	exonic	overlapping	Tm2d1	GeneID:362545,Genbank:XM_006238418.3,RGD:1305442	TM2 domain containing 1, transcript variant X2	GO:0004930,GO:0005634,GO:0005654,GO:0005887,GO:0007186,GO:0097190,GO:0001540	G-protein coupled receptor activity|nucleus|nucleoplasm|integral component of plasma membrane|G-protein coupled receptor signaling pathway|apoptotic signaling pathway|amyloid-beta binding
NONRATT023442.2	0.157689	-2.66484	0.000428028	Down	Chr5	126343875	126344781	-	NM_001005558.1	0	antisense	genic	intronic	nested	Fam151a	GeneID:313430,Genbank:NM_001005558.1,RGD:1359194	family with sequence similarity 151, member A	GO:0016021	integral component of membrane
NONRATT023508.2	2.50294	1.32362	0.037787	Up	Chr5	136022523	136023498	-	NM_031706.1	0	sense	genic	exonic	nested	Rps8	GeneID:65136,Genbank:NM_031706.1,RGD:61910	ribosomal protein S8	GO:0005783,GO:0005829,GO:0006412,GO:0008150,GO:0022627,GO:0000462,GO:0003674,GO:0003735	endoplasmic reticulum|cytosol|translation|biological_process|cytosolic small ribosomal subunit|maturation of SSU-rRNA from tricistronic rRNA transcript (SSU-rRNA, 5.8S rRNA, LSU-rRNA)|molecular_function|structural constituent of ribosome	rno03010	Ribosome
NONRATT023577.2	0.19042	-2.39274	0.0226548	Down	Chr5	140931860	140934067	-	NM_001107977.1	0	antisense	genic	exonic	nested	Heyl	GeneID:313575,Genbank:NM_001107977.1,RGD:1305022	hes-related family bHLH transcription factor with YRPW motif-like	GO:0072014,GO:0045666,GO:0006366,GO:0000989,GO:2000824,GO:0045892,GO:0007219,GO:0001077,GO:0045944,GO:0010629,GO:0001106,GO:0046982,GO:0003151,GO:0003181,GO:0003184,GO:0003198,GO:0014031,GO:0003203,GO:0050683,GO:0032835,GO:0003208,GO:0060317,GO:0035914,GO:0003700,GO:0060412,GO:0035939,GO:0003714,GO:0000122,GO:0060766,GO:0042803,GO:0005634,GO:0000979,GO:0071773,GO:0043565,GO:0005737,GO:0000983	proximal tubule development|positive regulation of neuron differentiation|transcription by RNA polymerase II|transcription factor activity, transcription factor binding|negative regulation of androgen receptor activity|negative regulation of transcription, DNA-templated|Notch signaling pathway|transcriptional activator activity, RNA polymerase II proximal promoter sequence-specific DNA binding|po…	rno05200,rno05224,rno05165	Pathways in cancer|Breast cancer|Human papillomavirus infection
NONRATT023615.2	0	#NAME?	0.0224069	Down	Chr5	144939721	144942516	-	XM_017593402.1	0	sense	genic	exonic	nested	Zmym4	GeneID:313598,Genbank:XM_017593402.1,RGD:1309545	zinc finger MYM-type containing 4, transcript variant X1	GO:0005737,GO:0006357,GO:0007010,GO:0007275,GO:0008270,GO:0022604,GO:0000981,GO:0003677,GO:0005654	cytoplasm|regulation of transcription by RNA polymerase II|cytoskeleton organization|multicellular organism development|zinc ion binding|regulation of cell morphogenesis|RNA polymerase II transcription factor activity, sequence-specific DNA binding|DNA binding|nucleoplasm
NONRATT023679.2	306.658	8.26049	2.42435e-12	Up	Chr5	151394505	151395424	-	XM_006239006.3	0	sense	genic	exonic	nested	Gpr3	GeneID:266769,Genbank:XM_006239006.3,RGD:628686	G protein-coupled receptor 3, transcript variant X1	GO:0007204,GO:0016021,GO:0030816,GO:0040020,GO:0004930,GO:0005886,GO:0007186	positive regulation of cytosolic calcium ion concentration|integral component of membrane|positive regulation of cAMP metabolic process|regulation of meiotic nuclear division|G-protein coupled receptor activity|plasma membrane|G-protein coupled receptor signaling pathway
NONRATT023686.2	2.09194	1.06484	0.0394334	Up	Chr5	151829793	151831374	-	NM_001039339.1	0	sense	genic	exonic	overlapping	Zdhhc18	GeneID:362613,Genbank:NM_001039339.1,RGD:1309334	zinc finger, DHHC-type containing 18	GO:0005794,GO:0006612,GO:0016021,GO:0016409,GO:0018230,GO:0018345,GO:0019706,GO:0034613,GO:0005783	Golgi apparatus|protein targeting to membrane|integral component of membrane|palmitoyltransferase activity|peptidyl-L-cysteine S-palmitoylation|protein palmitoylation|protein-cysteine S-palmitoyltransferase activity|cellular protein localization|endoplasmic reticulum
NONRATT023688.2	3.57327	1.83725	0.0133978	Up	Chr5	151832355	151835363	-	NM_001039339.1	0	sense	genic	exonic	nested	Zdhhc18	GeneID:362613,Genbank:NM_001039339.1,RGD:1309334	zinc finger, DHHC-type containing 18	GO:0005794,GO:0006612,GO:0016021,GO:0016409,GO:0018230,GO:0018345,GO:0019706,GO:0034613,GO:0005783	Golgi apparatus|protein targeting to membrane|integral component of membrane|palmitoyltransferase activity|peptidyl-L-cysteine S-palmitoylation|protein palmitoylation|protein-cysteine S-palmitoyltransferase activity|cellular protein localization|endoplasmic reticulum
NONRATT023806.2	2.01144	1.00823	0.0372282	Up	Chr5	160407583	160409076	-	NM_001031648.1	0	sense	genic	exonic	overlapping	Efhd2	GeneID:298609,Genbank:NM_001031648.1,RGD:1307585	EF-hand domain family, member D2	GO:0005509,GO:0045121,GO:0045296	calcium ion binding|membrane raft|cadherin binding
NONRATT023820.2	0.174091	-2.52208	0.00198383	Down	Chr5	162891447	162892303	-	NM_001108006.1	0	sense	genic	exonic	overlapping	Vps13d	GeneID:313825,Genbank:NM_001108006.1,RGD:1308403	vacuolar protein sorting 13D	GO:0006623,GO:0019898,GO:0045053	protein targeting to vacuole|extrinsic component of membrane|protein retention in Golgi apparatus
NONRATT023871.2	0.0500168	-4.32144	0.0335179	Down	Chr5	166092246	166138605	-	NM_057200.2	0	sense	genic	exonic	overlapping	Kif1b	GeneID:117548,Genbank:NM_057200.2,RGD:621520	kinesin family member 1B	GO:0005871,GO:0005874,GO:0005875,GO:0006098,GO:0007018,GO:0010970,GO:0016020,GO:0016192,GO:0016887,GO:0043005,GO:0019521,GO:0046982,GO:0019900,GO:0047497,GO:0030424,GO:0055114,GO:0071821,GO:0097110,GO:1904115,GO:0003777,GO:1904647,GO:1990090,GO:1990778,GO:0004616,GO:0005515,GO:0005524,GO:0005739,GO:0007270,GO:0007274,GO:0008017,GO:0008089,GO:0030425,GO:0030659,GO:0008574,GO:0010628,GO:0030705,GO:…	kinesin complex|microtubule|microtubule associated complex|pentose-phosphate shunt|microtubule-based movement|transport along microtubule|membrane|vesicle-mediated transport|ATPase activity|neuron projection|D-gluconate metabolic process|protein heterodimerization activity|kinase binding|mitochondrion transport along microtubule|axon|oxidation-reduction process|FANCM-MHF complex|scaffold protein …
NONRATT023903.2	Inf	Inf	0.0189509	Up	Chr5	169155241	169155988	-	NM_001108695.1	0	sense	genic	exonic	nested	Thap3	GeneID:362667,Genbank:NM_001108695.1,RGD:1308109	THAP domain containing 3	GO:0003677	DNA binding
NONRATT023947.2	2.93684	1.55426	0.00113868	Up	Chr5	173216736	173217672	-	NM_001013938.1	0	sense	genic	exonic	nested	Vwa1	GeneID:298683,Genbank:NM_001013938.1,RGD:1311476	von Willebrand factor A domain containing 1	GO:0005614,GO:0030198,GO:0031012,GO:0042802,GO:0048266,GO:0005576,GO:0005578,GO:0005604	interstitial matrix|extracellular matrix organization|extracellular matrix|identical protein binding|behavioral response to pain|extracellular region|proteinaceous extracellular matrix|basement membrane
NONRATT024042.2	Inf	Inf	0.00756379	Up	Chr6	19026731	19034292	+	NM_001135003.1	0	sense	genic	exonic	nested	Cwf19l2	GeneID:362804,Genbank:NM_001135003.1,RGD:1310083	CWF19-like 2, cell cycle control (S. pombe)
NONRATT024278.2	2.80196	1.48644	0.0314591	Up	Chr6	73658988	73679523	+	XM_017594342.1	0	sense	genic	exonic	nested	Akap6	GeneID:64553,Genbank:XM_017594342.1,RGD:69412	A-kinase anchoring protein 6, transcript variant X1	GO:0007194,GO:0008179,GO:0010738,GO:0010880,GO:0014701,GO:0031965,GO:0032516,GO:0014704,GO:0032947,GO:0016301,GO:0032991,GO:0034237,GO:0048471,GO:0034629,GO:0034704,GO:0051018,GO:0051281,GO:0051721,GO:0060306,GO:0001934,GO:2000481,GO:0005515,GO:0060316,GO:0005634,GO:0061051,GO:0005635,GO:0005640,GO:0005737,GO:0005901,GO:0016310,GO:0016529,GO:0019899,GO:0030307,GO:0030315,GO:0042383,GO:0043495,GO:…	negative regulation of adenylate cyclase activity|adenylate cyclase binding|regulation of protein kinase A signaling|regulation of release of sequestered calcium ion into cytosol by sarcoplasmic reticulum|junctional sarcoplasmic reticulum membrane|nuclear membrane|positive regulation of phosphoprotein phosphatase activity|intercalated disc|protein-containing complex scaffold activity|kinase activ…
NONRATT024287.2	2.27326	1.18477	0.0140136	Up	Chr6	75887834	75888825	+	NM_001170568.1	13981	antisense	intergenic	upstream	divergent	Baz1a	GeneID:314126,Genbank:NM_001170568.1,RGD:1306199	bromodomain adjacent to zinc finger domain, 1A	GO:0006261,GO:0006338,GO:0008150,GO:0008623,GO:0046872,GO:0000228,GO:0003674,GO:0005575	DNA-dependent DNA replication|chromatin remodeling|biological_process|CHRAC|metal ion binding|nuclear chromosome|molecular_function|cellular_component
NONRATT024313.2	0.247417	-2.01498	0.0267539	Down
NONRATT024426.2	Inf	Inf	0.00010102	Up	Chr6	100075352	100075787	+	XM_006240248.3	63899	antisense	intergenic	upstream	divergent	Max	GeneID:60661,Genbank:XM_006240248.3,RGD:621101	MYC associated factor X, transcript variant X1	GO:0003700,GO:0005515,GO:0005634,GO:0005737,GO:0006351,GO:0006355,GO:0045944,GO:0046982,GO:0006357,GO:0009267,GO:0048678,GO:0051402,GO:0060041,GO:0065003,GO:0070888,GO:0071339,GO:0000122,GO:0000790,GO:0000977,GO:0000978,GO:0000983,GO:0001078,GO:0001227,GO:0003677,GO:0010243,GO:0010629,GO:0016605,GO:0030425,GO:0032868,GO:0032993,GO:0042803,GO:0071375,GO:0090575,GO:0043565,GO:0044877	DNA binding transcription factor activity|protein binding|nucleus|cytoplasm|transcription, DNA-templated|regulation of transcription, DNA-templated|positive regulation of transcription by RNA polymerase II|protein heterodimerization activity|regulation of transcription by RNA polymerase II|cellular response to starvation|response to axon injury|neuron apoptotic process|retina development in camer…	rno04010,rno05200,rno05202,rno05222	MAPK signaling pathway|Pathways in cancer|Transcriptional misregulation in cancers|Small cell lung cancer
NONRATT024456.2	3.09784	1.63126	0.0164773	Up	Chr6	104614522	104615274	+	NM_001195505.1	0	sense	genic	exonic	nested	Srsf5	GeneID:29667,Genbank:NM_001195505.1,RGD:3664	serine and arginine rich splicing factor 5, transcript variant 1	GO:0032868,GO:0005634,GO:0032869,GO:0005730,GO:0005829,GO:0006351,GO:0033120,GO:0006355,GO:0043422,GO:0006397,GO:0050733,GO:0008380,GO:0051726,GO:0009611,GO:0001889,GO:0097421,GO:0016607,GO:0003723,GO:0005515	response to insulin|nucleus|cellular response to insulin stimulus|nucleolus|cytosol|transcription, DNA-templated|positive regulation of RNA splicing|regulation of transcription, DNA-templated|protein kinase B binding|mRNA processing|RS domain binding|RNA splicing|regulation of cell cycle|response to wounding|liver development|liver regeneration|nuclear speck|RNA binding|protein binding	rno03040,rno05168	Spliceosome|Herpes simplex infection
NONRATT024482.2	40.5991	5.34338	0.0186698	Up	Chr6	103469744	103471748	+	NM_031005.3	0	antisense	genic	exonic	overlapping	Actn1	GeneID:81634,Genbank:NM_031005.3,RGD:70907	actinin, alpha 1	GO:0005178,GO:0005509,GO:0005515,GO:0005622,GO:0005634,GO:0005737,GO:0007015,GO:0005829,GO:0016328,GO:0005884,GO:0017166,GO:0019904,GO:0030017,GO:0030018,GO:0042803,GO:0042995,GO:0030027,GO:0043197,GO:0030168,GO:0044325,GO:0045214,GO:0048041,GO:0001725,GO:0090636,GO:0090637,GO:0048741,GO:0097433,GO:0051015,GO:1903506,GO:0001726,GO:1990357,GO:0003725,GO:0005886,GO:0005903,GO:0005911,GO:0005915,GO:…	integrin binding|calcium ion binding|protein binding|intracellular|nucleus|cytoplasm|actin filament organization|cytosol|lateral plasma membrane|actin filament|vinculin binding|protein domain specific binding|sarcomere|Z disc|protein homodimerization activity|cell projection|lamellipodium|dendritic spine|platelet activation|ion channel binding|sarcomere organization|focal adhesion assembly|stress…	rno04510,rno04520,rno04530,rno04810,rno04670,rno05203,rno05322,rno05146	Focal adhesion|Adherens junction|Tight junction|Regulation of actin cytoskeleton|Leukocyte transendothelial migration|Viral carcinogenesis|Systemic lupus erythematosus|Amoebiasis
NONRATT024526.2	38.8933	5.28145	0.00253993	Up	Chr6	110638633	110640942	+	XM_578575.7	0	sense	genic	exonic	nested	Vash1	GeneID:503052,Genbank:XM_578575.7,RGD:1564082	vasohibin 1	GO:0005737,GO:0005783,GO:0009611,GO:0010596,GO:0016525,GO:0043537,GO:0045177,GO:0045765,GO:0060674,GO:0060716,GO:0001525,GO:1901491,GO:0001937,GO:2000772,GO:0005615	cytoplasm|endoplasmic reticulum|response to wounding|negative regulation of endothelial cell migration|negative regulation of angiogenesis|negative regulation of blood vessel endothelial cell migration|apical part of cell|regulation of angiogenesis|placenta blood vessel development|labyrinthine layer blood vessel development|angiogenesis|negative regulation of lymphangiogenesis|negative regulatio…
NONRATT024593.2	2.06824	1.0484	0.0199689	Up	Chr6	129325231	129325831	+	XM_017594545.1	3119	sense	intergenic	downstream	same_strand	LOC100909954	GeneID:100909954,Genbank:XM_017594545.1,RGD:6501064	uncharacterized LOC100909954
NONRATT024738.2	0.0197496	-5.66203	0.027386	Down	Chr6	145622809	145625236	+	XM_017594239.1	0	sense	genic	exonic	nested	Rapgef5	GeneID:362799,Genbank:XM_017594239.1,RGD:1561668	Rap guanine nucleotide exchange factor 5, transcript variant X1	GO:0007264,GO:0016604,GO:0017034,GO:0030742,GO:0005085,GO:0005634,GO:0005654	small GTPase mediated signal transduction|nuclear body|Rap guanyl-nucleotide exchange factor activity|GTP-dependent protein binding|guanyl-nucleotide exchange factor activity|nucleus|nucleoplasm	rno04014,rno04015	Ras signaling pathway|Rap1 signaling pathway
NONRATT024818.2	0.478003	-1.06491	0.0275681	Down	Chr6	14350761	14351162	-	NM_021767.2	0	sense	genic	intronic	nested	Nrxn1	GeneID:60391,Genbank:NM_021767.2,RGD:628659	neurexin 1	GO:0097105,GO:0097109,GO:0005730,GO:0097112,GO:0005783,GO:0099560,GO:0097114,GO:0005886,GO:1900020,GO:1903078,GO:0097116,GO:0007416,GO:1905520,GO:0006904,GO:2000310,GO:0007612,GO:0007157,GO:2000311,GO:0007623,GO:0009986,GO:2000463,GO:0030534,GO:0031175,GO:0031965,GO:0010628,GO:0031982,GO:0032991,GO:0001525,GO:0043025,GO:0033130,GO:0004888,GO:0044295,GO:0033138,GO:0005102,GO:0005105,GO:0045184,GO:…	presynaptic membrane assembly|neuroligin family protein binding|nucleolus|gamma-aminobutyric acid receptor clustering|endoplasmic reticulum|synaptic membrane adhesion|NMDA glutamate receptor clustering|plasma membrane|positive regulation of protein kinase C activity|positive regulation of protein localization to plasma membrane|gephyrin clustering involved in postsynaptic density assembly|synapse…	rno04514	Cell adhesion molecules (CAMs)
NONRATT024941.2	0.403992	-1.3076	0.00484905	Down	Chr6	45509894	45513227	-	XM_017594293.1	0	sense	genic	exonic	nested	Rnf144a	GeneID:500636,Genbank:XM_017594293.1,RGD:1561737	ring finger protein 144A, transcript variant X2	GO:0005794,GO:0016021,GO:0031624,GO:0032436,GO:0043231,GO:0046872,GO:0061630,GO:0000151,GO:0000209,GO:0005737	Golgi apparatus|integral component of membrane|ubiquitin conjugating enzyme binding|positive regulation of proteasomal ubiquitin-dependent protein catabolic process|intracellular membrane-bounded organelle|metal ion binding|ubiquitin protein ligase activity|ubiquitin ligase complex|protein polyubiquitination|cytoplasm
NONRATT024958.2	Inf	Inf	0.00822601	Up	Chr6	43350569	43363617	-	XM_006239979.3	0	sense	genic	exonic	nested	Itgb1bp1	GeneID:298914,Genbank:XM_006239979.3,RGD:1307810	integrin subunit beta 1 binding protein 1, transcript variant X1	GO:0005829,GO:0005856,GO:0005886,GO:0005925,GO:0006469,GO:0006933,GO:0007160,GO:0032148,GO:0007229,GO:0033622,GO:0008284,GO:0033628,GO:0008285,GO:0035148,GO:0035924,GO:0043087,GO:0043113,GO:0090051,GO:0044344,GO:0090314,GO:0044877,GO:0090315,GO:0045747,GO:1900025,GO:2001044,GO:0001726,GO:0002043,GO:0005092,GO:0005178,GO:0005634,GO:0005654,GO:0005737,GO:0005815,GO:0008565,GO:0010595,GO:0010764,GO:…	cytosol|cytoskeleton|plasma membrane|focal adhesion|negative regulation of protein kinase activity|negative regulation of cell adhesion involved in substrate-bound cell migration|cell-matrix adhesion|activation of protein kinase B activity|integrin-mediated signaling pathway|integrin activation|positive regulation of cell proliferation|regulation of cell adhesion mediated by integrin|negative reg…
NONRATT025081.2	10.1528	3.34381	1.19187e-09	Up	Chr6	92136234	92136940	-	XM_006240179.3	0	sense	genic	exonic	overlapping	Map4k5	GeneID:503027,Genbank:XM_006240179.3,RGD:1562028	mitogen-activated protein kinase kinase kinase kinase 5, transcript variant X1	GO:0004674,GO:0005524,GO:0005737,GO:0006468,GO:0007346,GO:0008349,GO:0023014,GO:0031098,GO:0032147,GO:0000165,GO:0035556,GO:0042981,GO:0000185	protein serine/threonine kinase activity|ATP binding|cytoplasm|protein phosphorylation|regulation of mitotic cell cycle|MAP kinase kinase kinase kinase activity|signal transduction by protein phosphorylation|stress-activated protein kinase signaling cascade|activation of protein kinase activity|MAPK cascade|intracellular signal transduction|regulation of apoptotic process|activation of MAPKKK act…
NONRATT025093.2	Inf	Inf	0.0215535	Up	Chr6	93549483	93562314	-	NM_133604.1	0	sense	genic	exonic	containing	Timm9	GeneID:171139,Genbank:NM_133604.1,RGD:621656	translocase of inner mitochondrial membrane 9, transcript variant 1	GO:0072321,GO:0005739,GO:0005743,GO:0008150,GO:0008565,GO:0042719,GO:0042721,GO:0042803,GO:0045039,GO:0046872,GO:0003674,GO:0051087,GO:0005215,GO:0005575	chaperone-mediated protein transport|mitochondrion|mitochondrial inner membrane|biological_process|protein transporter activity|mitochondrial intermembrane space protein transporter complex|mitochondrial inner membrane protein insertion complex|protein homodimerization activity|protein import into mitochondrial inner membrane|metal ion binding|molecular_function|chaperone binding|transporter acti…
NONRATT025099.2	0.0249069	-5.32731	0.0074954	Down	Chr6	94951442	94951889	-	NM_053865.1	0	sense	genic	exonic	nested	Rtn1	GeneID:116644,Genbank:NM_053865.1,RGD:620986	reticulon 1	GO:0005790,GO:0012505,GO:0016021,GO:0030182,GO:0005783,GO:0005789	smooth endoplasmic reticulum|endomembrane system|integral component of membrane|neuron differentiation|endoplasmic reticulum|endoplasmic reticulum membrane
NONRATT025182.2	0	-Inf	0.0135432	Down	Chr6	102409184	102409869	-	XM_008764781.1	0	sense	genic	exonic	overlapping	Zfyve26	GeneID:314265,Genbank:XM_008764781.1,RGD:1307820	zinc finger FYVE-type containing 26, transcript variant X2	GO:0005813,GO:0030496,GO:0032266,GO:0032465,GO:0000724,GO:0046872,GO:0005765	centrosome|midbody|phosphatidylinositol-3-phosphate binding|regulation of cytokinesis|double-strand break repair via homologous recombination|metal ion binding|lysosomal membrane
NONRATT025187.2	0.0506866	-4.30225	0.000843879	Down
NONRATT025229.2	0.109557	-3.19025	4.00272e-09	Down	Chr6	107163825	107164858	+	NM_001108984.1	0	sense	genic	exonic	nested	Rbm25	GeneID:366693,Genbank:NM_001108984.1,RGD:1308755	RNA binding motif protein 25	GO:0003729,GO:0005681,GO:0016607,GO:0042981,GO:0000381	mRNA binding|spliceosomal complex|nuclear speck|regulation of apoptotic process|regulation of alternative mRNA splicing, via spliceosome	rno03040	Spliceosome
NONRATT025250.2	0.00153929	-9.34352	0.00203816	Down	Chr6	114475157	114476186	-	NM_031720.4	0	sense	genic	exonic	nested	Dio2	GeneID:65162,Genbank:NM_031720.4,RGD:68418	deiodinase, iodothyronine, type II	GO:0006590,GO:0009409,GO:0016021,GO:0031625,GO:0032496,GO:0042403,GO:0042404,GO:0042446,GO:0004800,GO:0055114	thyroid hormone generation|response to cold|integral component of membrane|ubiquitin protein ligase binding|response to lipopolysaccharide|thyroid hormone metabolic process|thyroid hormone catabolic process|hormone biosynthetic process|thyroxine 5'-deiodinase activity|oxidation-reduction process	rno04919	Thyroid hormone signaling pathway
NONRATT025256.2	0.461322	-1.11615	0.010604	Down	Chr6	115392777	115395180	-	XM_006240407.3	3406	sense	intergenic	downstream	same_strand	Ston2	GeneID:314349,Genbank:XM_006240407.3,RGD:1311502	stonin 2, transcript variant X1	GO:0005730,GO:0005829,GO:0008021,GO:0016020,GO:0030054,GO:0030100,GO:0030136,GO:0043005,GO:0048488,GO:0002244,GO:0005515	nucleolus|cytosol|synaptic vesicle|membrane|cell junction|regulation of endocytosis|clathrin-coated vesicle|neuron projection|synaptic vesicle endocytosis|hematopoietic progenitor cell differentiation|protein binding
NONRATT025257.2	0.416933	-1.26211	0.00556606	Down	Chr6	115395573	115397037	-	XM_006240406.3	1549	sense	intergenic	downstream	same_strand	Ston2	GeneID:314349,Genbank:XM_006240406.3,RGD:1311502	stonin 2, transcript variant X2	GO:0005730,GO:0005829,GO:0008021,GO:0016020,GO:0030054,GO:0030100,GO:0030136,GO:0043005,GO:0048488,GO:0002244,GO:0005515	nucleolus|cytosol|synaptic vesicle|membrane|cell junction|regulation of endocytosis|clathrin-coated vesicle|neuron projection|synaptic vesicle endocytosis|hematopoietic progenitor cell differentiation|protein binding
NONRATT025262.2	5.88108	2.55608	5.81975e-07	Up	Chr6	122414876	122415901	-	XM_008764847.2	1178	sense	intergenic	downstream	same_strand	Kcnk10	GeneID:65272,Genbank:XM_008764847.2,RGD:619732	potassium two pore domain channel subfamily K member 10, transcript variant X2	GO:0005887,GO:0007613,GO:0022841,GO:0030322,GO:0034765,GO:0071805,GO:0005244,GO:0005267,GO:0005886	integral component of plasma membrane|memory|potassium ion leak channel activity|stabilization of membrane potential|regulation of ion transmembrane transport|potassium ion transmembrane transport|voltage-gated ion channel activity|potassium channel activity|plasma membrane	rno04971	Gastric acid secretion
NONRATT025315.2	0.428832	-1.22151	0.0209732	Down	Chr6	128466610	128467381	-	XM_008764766.2	6211	sense	intergenic	downstream	same_strand	Clmn	GeneID:299285,Genbank:XM_008764766.2,RGD:1306741	calmin, transcript variant X2	GO:0016021,GO:0031175,GO:0003779,GO:0005737,GO:0008285	integral component of membrane|neuron projection development|actin binding|cytoplasm|negative regulation of cell proliferation
NONRATT025316.2	0.391057	-1.35455	0.0117304	Down	Chr6	128468511	128470164	-	XM_017594105.1	3428	sense	intergenic	downstream	same_strand	Clmn	GeneID:299285,Genbank:XM_017594105.1,RGD:1306741	calmin, transcript variant X4	GO:0016021,GO:0031175,GO:0003779,GO:0005737,GO:0008285	integral component of membrane|neuron projection development|actin binding|cytoplasm|negative regulation of cell proliferation
NONRATT025432.2	0	-Inf	0.0075274	Down	Chr6	147089279	147092168	-	XM_006240697.3	0	sense	genic	exonic	nested	Itgb8	GeneID:362800,Genbank:XM_006240697.3,RGD:1311374	integrin subunit beta 8, transcript variant X1	GO:0007229,GO:0009986,GO:0010628,GO:0010629,GO:0034686,GO:0038023,GO:0045766,GO:0051216,GO:1990430,GO:0001573,GO:0005102,GO:0007160	integrin-mediated signaling pathway|cell surface|positive regulation of gene expression|negative regulation of gene expression|integrin alphav-beta8 complex|signaling receptor activity|positive regulation of angiogenesis|cartilage development|extracellular matrix protein binding|ganglioside metabolic process|signaling receptor binding|cell-matrix adhesion	rno04151,rno04512,rno04514,rno04510,rno04810,rno05410,rno05412,rno05414,rno05165	PI3K-Akt signaling pathway|ECM-receptor interaction|Cell adhesion molecules (CAMs)|Focal adhesion|Regulation of actin cytoskeleton|Hypertrophic cardiomyopathy (HCM)|Arrhythmogenic right ventricular cardiomyopathy (ARVC)|Dilated cardiomyopathy (DCM)|Human papillomavirus infection
NONRATT025487.2	0.40764	-1.29463	0.0320915	Down	Chr7	9884106	9899317	+	XM_006240826.3	0	sense	genic	exonic	nested	LOC100910577	GeneID:100910577,Genbank:XM_006240826.3,RGD:6497573	zinc finger protein 709-like, transcript variant X1	GO:0046872,GO:0003676,GO:0005634,GO:0006355	metal ion binding|nucleic acid binding|nucleus|regulation of transcription, DNA-templated
NONRATT025678.2	Inf	Inf	0.0343472	Up	Chr7	26375798	26384357	+	NM_001191778.1	0	sense	genic	exonic	overlapping	Aldh1l2	GeneID:299699,Genbank:NM_001191778.1,RGD:1309458	aldehyde dehydrogenase 1 family, member L2	GO:0005634,GO:0005739,GO:0006730,GO:0009058,GO:0009258,GO:0016021,GO:0016155,GO:0016742,GO:0055114,GO:0004029	nucleus|mitochondrion|one-carbon metabolic process|biosynthetic process|10-formyltetrahydrofolate catabolic process|integral component of membrane|formyltetrahydrofolate dehydrogenase activity|hydroxymethyl-, formyl- and related transferase activity|oxidation-reduction process|aldehyde dehydrogenase (NAD) activity	rno00670	One carbon pool by folate
NONRATT025680.2	23.7008	4.56686	1.36053e-05	Up	Chr7	26422616	26425968	+	NM_001191778.1	0	sense	genic	exonic	overlapping	Aldh1l2	GeneID:299699,Genbank:NM_001191778.1,RGD:1309458	aldehyde dehydrogenase 1 family, member L2	GO:0005634,GO:0005739,GO:0006730,GO:0009058,GO:0009258,GO:0016021,GO:0016155,GO:0016742,GO:0055114,GO:0004029	nucleus|mitochondrion|one-carbon metabolic process|biosynthetic process|10-formyltetrahydrofolate catabolic process|integral component of membrane|formyltetrahydrofolate dehydrogenase activity|hydroxymethyl-, formyl- and related transferase activity|oxidation-reduction process|aldehyde dehydrogenase (NAD) activity	rno00670	One carbon pool by folate
NONRATT025941.2	2.62531	1.39249	0.0292726	Up	Chr7	83348702	83356086	+	XM_006241615.2	0	sense	genic	exonic	nested	Eny2	GeneID:685258,Genbank:XM_006241615.2,RGD:1596439	ENY2, transcription and export complex 2 subunit, transcript variant X1	GO:0030374,GO:0003682,GO:0045893,GO:0003713,GO:0061179,GO:0005575,GO:0005643,GO:0005654,GO:0005739,GO:0070390,GO:0071819,GO:0006357,GO:0006368,GO:0016578,GO:0000124,GO:0016973,GO:0003674	ligand-dependent nuclear receptor transcription coactivator activity|chromatin binding|positive regulation of transcription, DNA-templated|transcription coactivator activity|negative regulation of insulin secretion involved in cellular response to glucose stimulus|cellular_component|nuclear pore|nucleoplasm|mitochondrion|transcription export complex 2|DUBm complex|regulation of transcription by R…
NONRATT025943.2	3.31742	1.73006	0.01054	Up	Chr7	83348747	83356086	+	NM_001130580.1	0	sense	genic	exonic	nested	Eny2	GeneID:685258,Genbank:NM_001130580.1,RGD:1596439	ENY2, transcription and export complex 2 subunit	GO:0030374,GO:0003682,GO:0045893,GO:0003713,GO:0061179,GO:0005575,GO:0005643,GO:0005654,GO:0005739,GO:0070390,GO:0071819,GO:0006357,GO:0006368,GO:0016578,GO:0000124,GO:0016973,GO:0003674	ligand-dependent nuclear receptor transcription coactivator activity|chromatin binding|positive regulation of transcription, DNA-templated|transcription coactivator activity|negative regulation of insulin secretion involved in cellular response to glucose stimulus|cellular_component|nuclear pore|nucleoplasm|mitochondrion|transcription export complex 2|DUBm complex|regulation of transcription by R…
NONRATT025964.2	0	-Inf	5.01472e-10	Down	Chr7	94997320	94999720	+	XM_017595234.1	0	sense	genic	exonic	nested	Deptor	GeneID:314979,Genbank:XM_017595234.1,RGD:1561030	DEP domain containing MTOR-interacting protein, transcript variant X2	GO:0006469,GO:0032007,GO:0035556,GO:0045792,GO:2001236,GO:0005622,GO:0005737	negative regulation of protein kinase activity|negative regulation of TOR signaling|intracellular signal transduction|negative regulation of cell size|regulation of extrinsic apoptotic signaling pathway|intracellular|cytoplasm	rno04150,rno04140	mTOR signaling pathway|Autophagy - animal
NONRATT025981.2	2.49312	1.31795	0.00297541	Up	Chr7	99961633	99962613	+	NM_023985.1	608	sense	intergenic	downstream	same_strand	Trib1	GeneID:78969,Genbank:NM_023985.1,RGD:621596	tribbles pseudokinase 1	GO:0055106,GO:0032496,GO:0005634,GO:0043405,GO:0005737,GO:0006469,GO:0007254,GO:0008134,GO:0014912,GO:0043433,GO:0031434,GO:0045645,GO:0045651,GO:0031625,GO:0045659,GO:0031665,GO:0004672,GO:0048662,GO:0032436,GO:0004860,GO:0050790,GO:0005524	ubiquitin-protein transferase regulator activity|response to lipopolysaccharide|nucleus|regulation of MAP kinase activity|cytoplasm|negative regulation of protein kinase activity|JNK cascade|transcription factor binding|negative regulation of smooth muscle cell migration|negative regulation of DNA binding transcription factor activity|mitogen-activated protein kinase kinase binding|positive regul…
NONRATT025985.2	3.46424	1.79254	0.0276303	Up	Chr7	102648928	102724348	+	NM_012603.2	57689	sense	intergenic	downstream	same_strand	Myc	GeneID:24577,Genbank:NM_012603.2,RGD:3130	myelocytomatosis oncogene	GO:0043066,GO:0043085,GO:0043279,GO:0043280,GO:0000987,GO:0001077,GO:0043388,GO:0001541,GO:0043473,GO:0001658,GO:0045787,GO:0043565,GO:0045821,GO:0044195,GO:0001701,GO:0045893,GO:0044330,GO:0001783,GO:0005634,GO:0002053,GO:0045944,GO:0002082,GO:0050910,GO:0046325,GO:0005635,GO:0051276,GO:0046722,GO:0005654,GO:0046982,GO:0051782,GO:0006352,GO:0006355,GO:0005719,GO:0051973,GO:0005730,GO:0060070,GO:…	negative regulation of apoptotic process|positive regulation of catalytic activity|response to alkaloid|positive regulation of cysteine-type endopeptidase activity involved in apoptotic process|proximal promoter sequence-specific DNA binding|transcriptional activator activity, RNA polymerase II proximal promoter sequence-specific DNA binding|positive regulation of DNA binding|ovarian follicle dev…	rno04010,rno04012,rno04310,rno04350,rno04390,rno04630,rno04151,rno04110,rno04218,rno04550,rno04919,rno05200,rno05230,rno05202,rno05206,rno05205,rno05210,rno05225,rno05226,rno05216,rno05221,rno05220,rno05219,rno05213,rno05224,rno05222,rno05166,rno05161,rno05167,rno05169	MAPK signaling pathway|ErbB signaling pathway|Wnt signaling pathway|TGF-beta signaling pathway|Hippo signaling pathway|Jak-STAT signaling pathway|PI3K-Akt signaling pathway|Cell cycle|Cellular senescence|Signaling pathways regulating pluripotency of stem cells|Thyroid hormone signaling pathway|Pathways in cancer|Central carbon metabolism in cancer|Transcriptional misregulation in cancers|MicroRNA…
NONRATT026176.2	0.0716625	-3.80264	0.0204657	Down	Chr7	124791605	124794585	+	XM_006242144.3	0	antisense	genic	exonic	nested	Efcab6	GeneID:315179,Genbank:XM_006242144.3,RGD:1309065	EF-hand calcium binding domain 6, transcript variant X6	GO:0005509,GO:0005654	calcium ion binding|nucleoplasm
NONRATT026181.2	0.400874	-1.31878	0.0265184	Down	Chr7	125609985	125612291	+	XM_008765725.2	646	sense	intergenic	downstream	same_strand	Prr5	GeneID:315189,Genbank:XM_008765725.2,RGD:1307954	proline rich 5, transcript variant X4	GO:0014068,GO:0031932,GO:0038203,GO:0001934	positive regulation of phosphatidylinositol 3-kinase signaling|TORC2 complex|TORC2 signaling|positive regulation of protein phosphorylation	rno04150	mTOR signaling pathway
[truncated: 350 more rows]
